# Supplementary material for: A Multiplexed, Next Generation Sequencing Platform for High-Throughput Detection of SARS-CoV-2
Source: medRxiv preprint, doi:10.1101/2020.10.15.20212712, version 1 (2020-10-20)
Supplement: Supplementary Table 1 to 9 [file 212712_file02.xlsx]

## Sheet: Supplementary Table 1
Supplementary Table 1: List of SARS-CoV-2 and human primers
sequence	Name	Gene specific amplicon Size (bp)	Adaptators size (bp)	Multiplex amplicon Size (bp)	Barcode primers size (bp)	Barcode Amplicon size (bp)	Group 1: PoC cohort (Figure 1)	Group 2,3: Test/Pilot cohort (Figure 2,3,4)	Group 4: Extended cohort (Figure 5)
acactctttccctacacgacgctcttccgatctTGCTGCTGCCGGGACCTTC	005-PPIB-For	127	67	194	69	263	Yes	Yes	No
gtgactggagttcagacgtgtgctcttccgatctTTTCCGAAGAGACCAAAGATCACC	005-PPIB-Rev						Yes	Yes	No
acactctttccctacacgacgctcttccgatctATCAGGCCGGTAGCACACCT	013-S-RBD-For	112	67	179	69	248	Yes	Yes	Yes
gtgactggagttcagacgtgtgctcttccgatctACTCTGTATGGTTGGTAACCAACAC	013-S-RBD-Rev						Yes	Yes	Yes
acactctttccctacacgacgctcttccgatctTATGCGCTAGTTATCAGACTCAGAC	014-S-PBS-For	113	67	180	69	249	Yes	Yes	Yes
gtgactggagttcagacgtgtgctcttccgatctGTAAGCAACTGAATTTTCTGCACCA	014-S-PBS-Rev						Yes	Yes	Yes
acactctttccctacacgacgctcttccgatctCCAGGCAGCARTAGGGGAAC	006-N-For-v	123	67	190	69	259	Yes	Yes	No
gtgactggagttcagacgtgtgctcttccgatctTTGGCCTTTACCAGACATTTTGCTC	006-N-Rev						Yes	Yes	No
acactctttccctacacgacgctcttccgatctAGACAGGTACGTTAATAGTTAATAGCG	008-E-For	125	67	192	69	261	Yes	Yes	No
gtgactggagttcagacgtgtgctcttccgatctCACGTTAACAATATTGCAGCAGTAC	008-E-Rev						Yes	Yes	No
acactctttccctacacgacgctcttccgatctTGAGTGARATGGTCATGTGTGGC	010-RdRP-For-v	116	69	185	69	254	Yes	No	No
gtgactggagttcagacgtgtgctcttccgatctGTGACAGCTTGACAAATGTTAAAAACAC	010-RdRP-Rev						Yes	No	No
acactctttccctacacgacgctcttccgatctACCGTTTCTATAGATTAGCTAATGAGT	011-RdRP-For	173	67	240	69	309	No	Yes	No
gtgactggagttcagacgtgtgctcttccgatctAAGTGCATTAACATTGGCCGTGAC	011-RdRP-Rev						No	Yes	No
acactctttccctacacgacgctcttccgatctGATGCCACAACTGCTTATGC	023-RdRP-For	116	67	183	69	252	No	No	Yes
gtgactggagttcagacgtgtgctcttccgatctTTGCGGACATACTTATCGGC	023-RdRP-Rev						No	No	Yes
acactctttccctacacgacgctcttccgatctTCACCATTGGCAATGAGCGGTTC	019-ACTB/G-For	120	67	187	69	256	No	No	Yes
gtgactggagttcagacgtgtgctcttccgatctCCACGTCACACTTCATGATGGAG	019-ACTB/G-Rev						No	No	Yes
For-v: codon optimized primer

## Sheet: Supplementary Table 2
Table 2: Itemized cost of C19-SPAR-seq per sample
Reagents	Supplier	Catalogue#	Unit	Price (CAD $)	Price per sample (CAD)	Price per sample (USD)
RNAclean XP beads	Beckman Coulter	A66514	450 mL	11000	3.5445	2.65837
Proteinase K (20mg/mL)	ThermoFisher	4333793	5mL	167	0.242029	0.181522
SuperScript™ III Reverse Transcriptase	Invitrogen	18080044	10000	656	1.312	0.984
RNase Inhibitor	ThermoFisher	EO0382	4*2,500	308	0.385	0.28875
100mM dNTP SET,	Genedirex	DN001025K	2 x (4 x 0.25ml)	254	0.01	0.0075
Phusion™ High-Fidelity DNA Polymerase & dNTP Mix (10 mM each)	ThermoFisher	F530N	2000 rxns	2520	1.26	0.945
Primers	Integrated DNA Technology				0.04	0.03
Sequencing Cost (based on MiSeq PE75 - V3)	Illumina		500 samples		4.15	3.1125
Sequencing Cost (based on NextSeq PE75 - High throughput)	Illumina		10,000 samples		0.85	0.6375
Total cost per sample (Miseq PE75 - 500 samples)					10.9435	8.20765
Total cost per sample (NextSeq PE75 - 10,000 samples)					7.64353	5.73265

## Sheet: Supplementary Table 3
Supplementary Table 3: Description of PoC cohort
						'BGI'qRT-PCR assay (Ct)
Barcodes	ID	Date of Retreival	Collection time	Collection method	Diagnostic laboratory status	RdRP	ACTB	Patient status (BGI)	Cohort Group
W633	LTRI-20	2020-03-30	post-COVID-19	NASOP	Negative	Un	18.8025	Negative	1
W645	LTRI-13	2020-03-26	post-COVID-19	NASOP	Negative	Un	24.5544	Negative	1
W657	LTRI-35	2020-03-30	post-COVID-19	NASOP	Positive	19.1098	23.3579	Postive (High)	1
W669	LTRI-36	2020-03-30	post-COVID-19	NASOP	Positive	20.3586	17.9386	Positive (Medium)	1
W586	LTRI-32	2020-03-30	post-COVID-19	NASOP	Positive	28.8543	17.4597	Positive (Low)	1
W598	LTRI-28	2020-03-30	post-COVID-19	NASOP	Positive	29.0153	20.417	Postive (Low)	1
W610	LTRI-27	2020-03-30	post-COVID-19	NASOP	Positive	32.8547	26.9445	Postive (Low)	1
W622	LTRI-33	2020-03-30	post-COVID-19	NASOP	Positive	29.1398	28.3537	Postive (Low)	1,2
W634	LTRI-21	2020-03-30	post-COVID-19	NASOP	Positive	30.5913	23.7928	Postive (Low)	1
W646	LTRI-22	2020-03-30	post-COVID-19	NASOP	Positive	23.0718	22.8479	Positive (Medium)	1
W658	LTRI-34	2020-03-30	post-COVID-19	NASOP	Positive	24.0351	24.2312	Positive (Medium)	1
W670	LTRI-24	2020-03-30	post-COVID-19	NASOP	Positive	21.8463	23.7216	Positive (Medium)	1
W587	LTRI-26	2020-03-30	post-COVID-19	NASOP	Positive	20.6454	21.9087	Positive (Medium)	1
W599	LTRI-29	2020-03-30	post-COVID-19	NASOP	Positive	21.4364	23.7986	Positive (Medium)	1
W611	LTRI-30	2020-03-30	post-COVID-19	NASOP	Positive	20.146	21.3424	Positive (Medium)	1
W623	LTRI-23	2020-03-30	post-COVID-19	NASOP	Positive	19.0545	20.3683	Postive (High)	1
W635	LTRI-31	2020-03-30	post-COVID-19	NASOP	Positive	17.6657	21.6764	Postive (High)	1
W647	LTRI-25	2020-03-30	post-COVID-19	NASOP	Positive	15.6824	20.2802	Postive (High)	1
W659	LTRI-18	2020-03-26	post-COVID-19	NASOP	Positive	15.3252	21.6181	Postive (High)	1

## Sheet: Supplementary Table 4
Supplementary Table 4: Description of testing cohort
					'Seegene' qRT-PCR assay (Seegene Allplex™ qRT)
Barcode ID	LTRI #	Date of Retreival	Collection time	Collection method	Diagnostic laboratory status	E	RdRP	N	Cohort Group
W481	LTRI-040	2020-04-21	post-COVID-19	NASOP	Positive	20.86	22.4	22.6	2
W482	LTRI-041	2020-04-21	post-COVID-19	NASOP	Positive	22	23.5	22.64	2
W483	LTRI-042	2020-04-21	post-COVID-19	NASOP	Positive	Un	Un	39.78	2
W484	LTRI-043	2020-04-21	post-COVID-19	NASOP	Positive	15.35	17.78	16.67	2
W485	LTRI-044	2020-04-21	post-COVID-19	NASOP	Positive	23.42	25.6	26.51	2
W486	LTRI-045	2020-04-21	post-COVID-19	NASOP	Positive	22.92	23.96	24.99	2
W487	LTRI-046	2020-04-21	post-COVID-19	NASOP	Positive	19.46	20.92	21.39	2
W488	LTRI-047	2020-04-21	post-COVID-19	NASOP	Positive	30.41	31.15	31.21	2
W489	LTRI-048	2020-04-21	post-COVID-19	NASOP	Positive	16.2	17.93	15.86	2
W490	LTRI-049	2020-04-21	post-COVID-19	NASOP	Positive	26.1	27.37	27.25	2
W491	LTRI-050	2020-04-21	post-COVID-19	NASOP	Positive	Un	Un	38.29	2
W492	LTRI-051	2020-04-21	post-COVID-19	NASOP	Positive	26.1	27.37	27.25	2
W493	LTRI-052	2020-04-21	post-COVID-19	NASOP	Positive	25.89	27.07	28.17	2
W494	LTRI-053	2020-04-21	post-COVID-19	NASOP	Positive	18.75	20.71	19.17	2
W495	LTRI-054	2020-04-21	post-COVID-19	NASOP	Positive	21.4	22.14	23.28	2
W577	LTRI-055	2020-04-21	post-COVID-19	NASOP	Positive	10.7	12.89	11.69	2
W578	LTRI-056	2020-04-21	post-COVID-19	NASOP	Positive	24.02	24.54	25.47	2
W579	LTRI-057	2020-04-21	post-COVID-19	NASOP	Positive	12.63	14.97	14.33	2
W580	LTRI-058	2020-04-21	post-COVID-19	NASOP	Positive	16.83	19.02	17.18	2
W581	LTRI-059	2020-04-21	post-COVID-19	NASOP	Positive	19.74	20.72	21.61	2
W582	LTRI-060	2020-04-21	post-COVID-19	NASOP	Positive	10.72	12.99	12.39	2
W583	LTRI-061	2020-04-21	post-COVID-19	NASOP	Positive	25.24	26.61	27.5	2
W584	LTRI-062	2020-04-21	post-COVID-19	NASOP	Positive	23.27	26.11	24.95	2
W585	LTRI-063	2020-04-21	post-COVID-19	NASOP	Negative	Un	Un	Un	2
W586	LTRI-064	2020-04-21	post-COVID-19	NASOP	Negative	Un	Un	Un	2
W587	LTRI-065	2020-04-21	post-COVID-19	NASOP	Negative	Un	Un	Un	2
W496	LTRI-066	2020-04-21	post-COVID-19	NASOP	Negative	Un	Un	Un	2
W497	LTRI-067	2020-04-21	post-COVID-19	NASOP	Negative	Un	Un	Un	2
W498	LTRI-068	2020-04-21	post-COVID-19	NASOP	Negative	Un	Un	Un	2
W499	LTRI-069	2020-04-21	post-COVID-19	NASOP	Negative	Un	Un	Un	2
W500	LTRI-070	2020-04-21	post-COVID-19	NASOP	Negative	Un	Un	Un	2
W501	LTRI-071	2020-04-21	post-COVID-19	NASOP	Negative	Un	Un	Un	2
W502	LTRI-072	2020-04-21	post-COVID-19	NASOP	Negative	Un	Un	Un	2
W503	LTRI-073	2020-04-21	post-COVID-19	NASOP	Negative	Un	Un	Un	2
W504	LTRI-074	2020-04-21	post-COVID-19	NASOP	Negative	Un	Un	Un	2
W505	LTRI-075	2020-04-21	post-COVID-19	NASOP	Negative	Un	Un	Un	2
W506	LTRI-076	2020-04-21	post-COVID-19	NASOP	Negative	Un	Un	Un	2
W507	LTRI-077	2020-04-21	post-COVID-19	NASOP	Negative	Un	Un	Un	2
W508	LTRI-078	2020-04-21	post-COVID-19	NASOP	Negative	Un	Un	Un	2
W509	LTRI-079	2020-04-21	post-COVID-19	NASOP	Negative	Un	Un	Un	2
W510	LTRI-080	2020-04-21	post-COVID-19	NASOP	Negative	Un	Un	Un	2
W511	LTRI-081	2020-04-21	post-COVID-19	NASOP	Negative	Un	Un	Un	2
W512	LTRI-082	2020-04-21	post-COVID-19	NASOP	Negative	Un	Un	Un	2
W513	LTRI-083	2020-04-21	post-COVID-19	NASOP	Negative	Un	Un	Un	2
W514	LTRI-084	2020-04-21	post-COVID-19	NASOP	Negative	Un	Un	Un	2
W515	LTRI-085	2020-04-21	post-COVID-19	NASOP	Negative	Un	Un	Un	2
W516	LTRI-086	2020-04-21	post-COVID-19	NASOP	Negative	Un	Un	Un	2
W588	LTRI-087	2020-04-21	post-COVID-19	NASOP	Negative	Un	Un	Un	2
W589	LTRI-088	2020-04-21	post-COVID-19	NASOP	Negative	Un	Un	Un	2
W590	LTRI-089	2020-04-21	post-COVID-19	NASOP	Negative	Un	Un	Un	2
W591	LTRI-090	2020-04-21	post-COVID-19	NASOP	Negative	Un	Un	Un	2
W594	LTRI-091	2020-04-21	post-COVID-19	NASOP	Negative	Un	Un	Un	2
W593	LTRI-092	2020-04-21	post-COVID-19	NASOP	Negative	Un	Un	Un	2
W592	LTRI-093	2020-04-21	post-COVID-19	NASOP	Negative	Un	Un	Un	2
W595	LTRI-094	2020-04-21	post-COVID-19	NASOP	Negative	Un	Un	Un	2
W596	LTRI-095	2020-04-21	post-COVID-19	NASOP	Negative	Un	Un	Un	2
W597	LTRI-096	2020-04-21	post-COVID-19	NASOP	Negative	Un	Un	Un	2
W598	LTRI-097	2020-04-21	post-COVID-19	NASOP	Negative	Un	Un	Un	2
W599	LTRI-098	2020-04-21	post-COVID-19	NASOP	Negative	Un	Un	Un	2
W600	LTRI-099	2020-04-21	post-COVID-19	NASOP	Negative	Un	Un	Un	2
W601	LTRI-100	2020-04-21	post-COVID-19	NASOP	Negative	Un	Un	Un	2
W602	LTRI-101	2020-04-21	post-COVID-19	NASOP	Negative	Un	Un	Un	2
W603	LTRI-102	2020-04-21	post-COVID-19	NASOP	Negative	Un	Un	Un	2
W517	LTRI-103	2020-04-21	post-COVID-19	NASOP	Negative	Un	Un	Un	2
W518	LTRI-104	2020-04-21	post-COVID-19	NASOP	Negative	Un	Un	Un	2
W519	LTRI-105	2020-04-21	post-COVID-19	NASOP	Negative	Un	Un	Un	2
W520	LTRI-106	2020-04-21	post-COVID-19	NASOP	Negative	Un	Un	Un	2
W521	LTRI-107	2020-04-21	post-COVID-19	NASOP	Negative	Un	Un	Un	2
W522	LTRI-108	2020-04-21	post-COVID-19	NASOP	Negative	Un	Un	Un	2
W523	LTRI-109	2020-04-21	post-COVID-19	NASOP	Negative	Un	Un	Un	2
W524	LTRI-110	2020-04-21	post-COVID-19	NASOP	Negative	Un	Un	Un	2
W525	LTRI-111	2020-04-21	post-COVID-19	NASOP	Negative	Un	Un	Un	2
W526	LTRI-112	2020-04-21	post-COVID-19	NASOP	Negative	Un	Un	Un	2
W527	LTRI-113	2020-04-21	post-COVID-19	NASOP	Negative	Un	Un	Un	2
W604	LTRI-114	2020-04-21	post-COVID-19	NASOP	Negative	Un	Un	Un	2
W605	LTRI-115	2020-04-21	post-COVID-19	NASOP	Negative	Un	Un	Un	2
W606	LTRI-116	2020-04-21	post-COVID-19	NASOP	Negative	Un	Un	Un	2
W607	LTRI-117	2020-04-21	post-COVID-19	NASOP	Negative	Un	Un	Un	2
W608	LTRI-118	2020-04-21	post-COVID-19	NASOP	Negative	Un	Un	Un	2
W609	LTRI-119	2020-04-21	post-COVID-19	NASOP	Negative	Un	Un	Un	2
W610	LTRI-120	2020-04-21	post-COVID-19	NASOP	Negative	Un	Un	Un	2
W611	LTRI-121	2020-04-21	post-COVID-19	NASOP	Negative	Un	Un	Un	2
W612	LTRI-122	2020-04-21	post-COVID-19	NASOP	Negative	Un	Un	Un	2
W613	LTRI-123	2020-04-21	post-COVID-19	NASOP	Negative	Un	Un	Un	2
W614	LTRI-124	2020-04-21	post-COVID-19	NASOP	Negative	Un	Un	Un	2
W615	LTRI-125	2020-04-21	post-COVID-19	NASOP	Negative	Un	Un	Un	2
W528	LTRI-126	2020-04-21	post-COVID-19	NASOP	Negative	Un	Un	Un	2
W529	LTRI-127	2020-04-21	post-COVID-19	NASOP	Negative	Un	Un	Un	2
W530	LTRI-128	2020-04-21	post-COVID-19	NASOP	Negative	Un	Un	Un	2
W531	LTRI-129	2020-04-21	post-COVID-19	NASOP	Negative	Un	Un	Un	2
W532	LTRI-130	2020-04-21	post-COVID-19	NASOP	Negative	Un	Un	Un	2
W533	LTRI-131	2020-04-21	post-COVID-19	NASOP	Negative	Un	Un	Un	2
W534	LTRI-132	2020-04-21	post-COVID-19	NASOP	Negative	Un	Un	Un	2
W535	LTRI-033	2020-03-30	post-COVID-19	NASOP	Positive	27.2	27.9	28.1	1,2
W536	LTRI-134	2020-04-21	post-COVID-19	NASOP	Negative	Un	Un	Un	2
W629	LTRI-135	2020-04-21	post-COVID-19	NASOP	Negative	Un	Un	Un	2
W630	LTRI-136	2020-04-21	post-COVID-19	NASOP	Negative	Un	Un	Un	2
W537	LTRI-137	2020-04-21	post-COVID-19	NASOP	Negative	Un	Un	Un	2
W538	LTRI-138	2020-04-21	post-COVID-19	NASOP	Negative	Un	Un	Un	2
W616	LTRI-139	2020-04-21	post-COVID-19	NASOP	Negative	Un	Un	Un	2
W617	LTRI-140	2020-04-21	post-COVID-19	NASOP	Negative	Un	Un	Un	2
W618	LTRI-141	2020-04-21	post-COVID-19	NASOP	Negative	Un	Un	Un	2
W619	LTRI-142	2020-04-21	post-COVID-19	NASOP	Negative	Un	Un	Un	2
W620	LTRI-143	2020-04-21	post-COVID-19	NASOP	Negative	Un	Un	Un	2
W621	LTRI-144	2020-04-21	post-COVID-19	NASOP	Negative	Un	Un	Un	2
W622	LTRI-145	2020-04-21	post-COVID-19	NASOP	Negative	Un	Un	Un	2
W623	LTRI-146	2020-04-21	post-COVID-19	NASOP	Negative	Un	Un	Un	2
W624	LTRI-147	2020-04-21	post-COVID-19	NASOP	Negative	Un	Un	Un	2
W625	LTRI-148	2020-04-21	post-COVID-19	NASOP	Negative	Un	Un	Un	2
W626	LTRI-149	2020-04-21	post-COVID-19	NASOP	Negative	Un	Un	Un	2
W627	LTRI-150	2020-04-21	post-COVID-19	NASOP	Negative	Un	Un	Un	2
W628	LTRI-151	2020-04-21	post-COVID-19	NASOP	Negative	Un	Un	Un	2

## Sheet: Supplementary Table 5
Supplementary Table 5: Confusion matrix of test cohort
'Seegene' : Ct <40		Actual
		Positive (24)	Negative (73)
Predicted	Positive (22)	22	0
	Negative (75)	2	73
		Values
	Sensitivity	0.917
	Specificity	1
	PPV	1
	NPV	0.973
	Accuracy	0.979381

## Sheet: Supplementary Table 6
Supplementary Table 6: Description of pilot cohort
						'Seegene' qRT-PCR assay (Seegene Allplex™)			'BGI' qRT-PCR assay (Ct)
Barcodes	LTRI #	Date of Retreival	Collection time	Collection method	Diagnostic laboratory status	E	RdRp	N	RdRP	ACTB	Neg > 37, Pos < 37 (BGI)	Neg > 35, Pos < 35 (BGI)	Starting Quantity BGI output (copies/uL)	Sample Viral Load (copies/uL)	Filtered Archival Samples: Clinical diagnosis Positive and 'BGI' negative (Ct > 37)	Cohort Group
W001	LTRI-200	JAN (9) 2019	pre-COVID-19	NASOP	Negative for A B RSV	NA	NA	NA	NA	NA	Not tested	Not tested	NA	NA	NA	3,4
W002	LTRI-201	JAN (9) 2019	pre-COVID-19	NASOP	Negative for A B RSV	NA	NA	NA	NA	NA	Not tested	Not tested	NA	NA	NA	3,4
W003	LTRI-202	JAN (9) 2019	pre-COVID-19	NASOP	Negative for A B RSV	NA	NA	NA	NA	NA	Not tested	Not tested	NA	NA	NA	3,4
W004	LTRI-203	JAN (9) 2019	pre-COVID-19	NASOP	Negative for A B RSV	NA	NA	NA	NA	NA	Not tested	Not tested	NA	NA	NA	3,4
W005	LTRI-204	JAN (9) 2019	pre-COVID-19	NASOP	Negative for A B RSV	NA	NA	NA	NA	NA	Not tested	Not tested	NA	NA	NA	3,4
W006	LTRI-205	JAN (9) 2019	pre-COVID-19	NASOP	Negative for A B RSV	NA	NA	NA	NA	NA	Not tested	Not tested	NA	NA	NA	3,4
W007	LTRI-206	JAN (9) 2019	pre-COVID-19	NASOP	Negative for A B RSV	NA	NA	NA	NA	NA	Not tested	Not tested	NA	NA	NA	3,4
W008	LTRI-207	JAN (9) 2019	pre-COVID-19	NASOP	Negative for A B RSV	NA	NA	NA	NA	NA	Not tested	Not tested	NA	NA	NA	3,4
W009	LTRI-208	JAN (9) 2019	pre-COVID-19	NASOP	Negative for A B RSV	NA	NA	NA	NA	NA	Not tested	Not tested	NA	NA	NA	3,4
W010	LTRI-209	JAN (9) 2019	pre-COVID-19	NASOP	Negative for A B RSV	NA	NA	NA	NA	NA	Not tested	Not tested	NA	NA	NA	3,4
W011	LTRI-210	JAN (9) 2019	pre-COVID-19	NASOP	Negative for A B RSV	NA	NA	NA	NA	NA	Not tested	Not tested	NA	NA	NA	3,4
W012	LTRI-211	JAN (9) 2019	pre-COVID-19	NASOP	Negative for A B RSV	NA	NA	NA	NA	NA	Not tested	Not tested	NA	NA	NA	3,4
W013	LTRI-212	JAN (9) 2019	pre-COVID-19	NASOP	Negative for A B RSV	NA	NA	NA	NA	NA	Not tested	Not tested	NA	NA	NA	3,4
W014	LTRI-213	JAN (9) 2019	pre-COVID-19	NASOP	Negative for A B RSV	NA	NA	NA	NA	NA	Not tested	Not tested	NA	NA	NA	3,4
W015	LTRI-214	JAN (9) 2019	pre-COVID-19	NASOP	Negative for A B RSV	NA	NA	NA	NA	NA	Not tested	Not tested	NA	NA	NA	3,4
W016	LTRI-215	JAN (9) 2019	pre-COVID-19	NASOP	Negative for A B RSV	NA	NA	NA	NA	NA	Not tested	Not tested	NA	NA	NA	3,4
W017	LTRI-216	JAN (9) 2019	pre-COVID-19	NASOP	Negative for A B RSV	NA	NA	NA	NA	NA	Not tested	Not tested	NA	NA	NA	3,4
W018	LTRI-217	JAN (9) 2019	pre-COVID-19	NASOP	Negative for A B RSV	NA	NA	NA	NA	NA	Not tested	Not tested	NA	NA	NA	3,4
W019	LTRI-218	JAN (9) 2019	pre-COVID-19	NASOP	Negative for A B RSV	NA	NA	NA	NA	NA	Not tested	Not tested	NA	NA	NA	3,4
W020	LTRI-219	JAN (9) 2019	pre-COVID-19	NASOP	Negative for A B RSV	NA	NA	NA	NA	NA	Not tested	Not tested	NA	NA	NA	3,4
W021	LTRI-220	JAN (9) 2019	pre-COVID-19	NASOP	Negative for A B RSV	NA	NA	NA	NA	NA	Not tested	Not tested	NA	NA	NA	3,4
W022	LTRI-221	JAN (9) 2019	pre-COVID-19	NASOP	Negative for A B RSV	NA	NA	NA	NA	NA	Not tested	Not tested	NA	NA	NA	3,4
W023	LTRI-222	JAN (9) 2019	pre-COVID-19	NASOP	Negative for A B RSV	NA	NA	NA	NA	NA	Not tested	Not tested	NA	NA	NA	3,4
W024	LTRI-223	JAN (9) 2019	pre-COVID-19	NASOP	Negative for A B RSV	NA	NA	NA	NA	NA	Not tested	Not tested	NA	NA	NA	3,4
W025	LTRI-224	JAN (9) 2019	pre-COVID-19	NASOP	Negative for A B RSV	NA	NA	NA	NA	NA	Not tested	Not tested	NA	NA	NA	3,4
W026	LTRI-225	JAN (9) 2019	pre-COVID-19	NASOP	Negative for A B RSV	NA	NA	NA	NA	NA	Not tested	Not tested	NA	NA	NA	3,4
W027	LTRI-226	JAN (9) 2019	pre-COVID-19	NASOP	Negative for A B RSV	NA	NA	NA	NA	NA	Not tested	Not tested	NA	NA	NA	3,4
W028	LTRI-227	JAN (9) 2019	pre-COVID-19	BAL	Influenza A virus	NA	NA	NA	NA	NA	Not tested	Not tested	NA	NA	NA	3,4
W029	LTRI-228	JAN (9) 2019	pre-COVID-19	NASOP	Negative for A B RSV	NA	NA	NA	NA	NA	Not tested	Not tested	NA	NA	NA	3,4
W030	LTRI-229	JAN (9) 2019	pre-COVID-19	NASOP	Negative for A B RSV	NA	NA	NA	NA	NA	Not tested	Not tested	NA	NA	NA	3,4
W031	LTRI-230	JAN (9) 2019	pre-COVID-19	NASOP	Negative for A B RSV	NA	NA	NA	NA	NA	Not tested	Not tested	NA	NA	NA	3,4
W032	LTRI-231	JAN (9) 2019	pre-COVID-19	NASOP	Negative for A B RSV	NA	NA	NA	NA	NA	Not tested	Not tested	NA	NA	NA	3,4
W033	LTRI-232	JAN (9) 2019	pre-COVID-19	NASOP	Negative for A B RSV	NA	NA	NA	NA	NA	Not tested	Not tested	NA	NA	NA	3,4
W034	LTRI-233	JAN (9) 2019	pre-COVID-19	NASOP	Negative for A B RSV	NA	NA	NA	NA	NA	Not tested	Not tested	NA	NA	NA	3,4
W035	LTRI-234	JAN (9) 2019	pre-COVID-19	BAL	Negative for A B RSV	NA	NA	NA	NA	NA	Not tested	Not tested	NA	NA	NA	3,4
W036	LTRI-235	JAN (9) 2019	pre-COVID-19	NASOP	Negative for A B RSV	NA	NA	NA	NA	NA	Not tested	Not tested	NA	NA	NA	3,4
W037	LTRI-236	JAN (9) 2019	pre-COVID-19	NASOP	Negative for A B RSV	NA	NA	NA	NA	NA	Not tested	Not tested	NA	NA	NA	3,4
W038	LTRI-237	JAN (9) 2019	pre-COVID-19	NASOP	Negative for A B RSV	NA	NA	NA	NA	NA	Not tested	Not tested	NA	NA	NA	3,4
W039	LTRI-238	JAN (9) 2019	pre-COVID-19	NASOP	Negative for A B RSV	NA	NA	NA	NA	NA	Not tested	Not tested	NA	NA	NA	3,4
W040	LTRI-239	JAN (9) 2019	pre-COVID-19	NASOP	Respiratory syncytial virus	NA	NA	NA	NA	NA	Not tested	Not tested	NA	NA	NA	3,4
W041	LTRI-240	JAN (9) 2019	pre-COVID-19	NASOP	Negative for A B RSV	NA	NA	NA	NA	NA	Not tested	Not tested	NA	NA	NA	3,4
W042	LTRI-241	JAN (9) 2019	pre-COVID-19	BAL	Negative for A B RSV	NA	NA	NA	NA	NA	Not tested	Not tested	NA	NA	NA	3,4
W043	LTRI-242	JAN (9) 2019	pre-COVID-19	BAL	Respiratory syncytial virus	NA	NA	NA	NA	NA	Not tested	Not tested	NA	NA	NA	3,4
W044	LTRI-243	JAN (9) 2019	pre-COVID-19	BAL	Negative for A B RSV	NA	NA	NA	NA	NA	Not tested	Not tested	NA	NA	NA	3,4
W045	LTRI-244	JAN (9) 2019	pre-COVID-19	NASOP	Negative for A B RSV	NA	NA	NA	NA	NA	Not tested	Not tested	NA	NA	NA	3,4
W046	LTRI-245	JAN (9) 2019	pre-COVID-19	NASOP	Negative for A B RSV	NA	NA	NA	NA	NA	Not tested	Not tested	NA	NA	NA	3,4
W047	LTRI-246	JAN (9) 2019	pre-COVID-19	NASOP	Negative for A B RSV	NA	NA	NA	NA	NA	Not tested	Not tested	NA	NA	NA	3,4
W048	LTRI-247	JAN (9) 2019	pre-COVID-19	BAL	Negative for A B RSV	NA	NA	NA	NA	NA	Not tested	Not tested	NA	NA	NA	3,4
W049	LTRI-248	JAN (9) 2019	pre-COVID-19	NASOP	Negative for A B RSV	NA	NA	NA	NA	NA	Not tested	Not tested	NA	NA	NA	3,4
W050	LTRI-249	JAN (9) 2019	pre-COVID-19	NASOP	Negative for A B RSV	NA	NA	NA	NA	NA	Not tested	Not tested	NA	NA	NA	3,4
W051	LTRI-250	JAN (9) 2019	pre-COVID-19	NASOP	Negative for A B RSV	NA	NA	NA	NA	NA	Not tested	Not tested	NA	NA	NA	3,4
W052	LTRI-251	JAN (9) 2019	pre-COVID-19	NASOP	Negative for A B RSV	NA	NA	NA	NA	NA	Not tested	Not tested	NA	NA	NA	3,4
W053	LTRI-252	JAN (9) 2019	pre-COVID-19	NASOP	Negative for A B RSV	NA	NA	NA	NA	NA	Not tested	Not tested	NA	NA	NA	3,4
W054	LTRI-253	JAN (9) 2019	pre-COVID-19	NASOP	Negative for A B RSV	NA	NA	NA	NA	NA	Not tested	Not tested	NA	NA	NA	3,4
W055	LTRI-254	JAN (9) 2019	pre-COVID-19	NASOP	Negative for A B RSV	NA	NA	NA	NA	NA	Not tested	Not tested	NA	NA	NA	3,4
W056	LTRI-255	JAN (9) 2019	pre-COVID-19	BAL	Negative for A B RSV	NA	NA	NA	NA	NA	Not tested	Not tested	NA	NA	NA	3,4
W057	LTRI-256	JAN (9) 2019	pre-COVID-19	NASOP	Negative for A B RSV	NA	NA	NA	NA	NA	Not tested	Not tested	NA	NA	NA	3,4
W058	LTRI-257	JAN (9) 2019	pre-COVID-19	NASOP	Negative for A B RSV	NA	NA	NA	NA	NA	Not tested	Not tested	NA	NA	NA	3,4
W059	LTRI-258	JAN (9) 2019	pre-COVID-19	NASOP	Negative for A B RSV	NA	NA	NA	NA	NA	Not tested	Not tested	NA	NA	NA	3,4
W060	LTRI-259	JAN (9) 2019	pre-COVID-19	NASOP	Negative for A B RSV	NA	NA	NA	NA	NA	Not tested	Not tested	NA	NA	NA	3,4
W061	LTRI-260	JAN (9) 2019	pre-COVID-19	NASOP	Negative for A B RSV	NA	NA	NA	NA	NA	Not tested	Not tested	NA	NA	NA	3,4
W062	LTRI-261	JAN (9) 2019	pre-COVID-19	NASOP	Negative for A B RSV	NA	NA	NA	NA	NA	Not tested	Not tested	NA	NA	NA	3,4
W063	LTRI-262	JAN (9) 2019	pre-COVID-19	NASOP	Negative for A B RSV	NA	NA	NA	NA	NA	Not tested	Not tested	NA	NA	NA	3,4
W064	LTRI-263	JAN (9) 2019	pre-COVID-19	BAL	Negative for A B RSV	NA	NA	NA	NA	NA	Not tested	Not tested	NA	NA	NA	3,4
W065	LTRI-264	JAN (9) 2019	pre-COVID-19	BAL	Negative for A B RSV	NA	NA	NA	NA	NA	Not tested	Not tested	NA	NA	NA	3,4
W066	LTRI-265	JAN (9) 2019	pre-COVID-19	NASOP	Negative for A B RSV	NA	NA	NA	NA	NA	Not tested	Not tested	NA	NA	NA	3,4
W067	LTRI-266	JAN (9) 2019	pre-COVID-19	NNP	Negative for A B RSV	NA	NA	NA	NA	NA	Not tested	Not tested	NA	NA	NA	3,4
W068	LTRI-267	JAN (9) 2019	pre-COVID-19	NASOP	Negative for A B RSV	NA	NA	NA	NA	NA	Not tested	Not tested	NA	NA	NA	3,4
W069	LTRI-268	JAN (9) 2019	pre-COVID-19	NASOP	Negative for A B RSV	NA	NA	NA	NA	NA	Not tested	Not tested	NA	NA	NA	3,4
W070	LTRI-269	JAN (9) 2019	pre-COVID-19	BAL	Negative for A B RSV	NA	NA	NA	NA	NA	Not tested	Not tested	NA	NA	NA	3,4
W071	LTRI-270	JAN (9) 2019	pre-COVID-19	NASOP	Negative for A B RSV	NA	NA	NA	NA	NA	Not tested	Not tested	NA	NA	NA	3,4
W072	LTRI-271	JAN (9) 2019	pre-COVID-19	BAL	Negative for A B RSV	NA	NA	NA	NA	NA	Not tested	Not tested	NA	NA	NA	3,4
W097	LTRI-272	JAN (9) 2019	pre-COVID-19	BAL	Negative for A B RSV	NA	NA	NA	NA	NA	Not tested	Not tested	NA	NA	NA	3,4
W098	LTRI-273	JAN (9) 2019	pre-COVID-19	BAL	Negative for A B RSV	NA	NA	NA	NA	NA	Not tested	Not tested	NA	NA	NA	3,4
W099	LTRI-274	JAN (9) 2019	pre-COVID-19	BAL	Negative for A B RSV	NA	NA	NA	NA	NA	Not tested	Not tested	NA	NA	NA	3,4
W100	LTRI-275	JAN (9) 2019	pre-COVID-19	NASOP	Negative for A B RSV	NA	NA	NA	NA	NA	Not tested	Not tested	NA	NA	NA	3,4
W101	LTRI-276	JAN (9) 2019	pre-COVID-19	BAL	PJP detected by PCR	NA	NA	NA	NA	NA	Not tested	Not tested	NA	NA	NA	3,4
W102	LTRI-277	JAN (9) 2019	pre-COVID-19	NASOP	Negative for A B RSV	NA	NA	NA	NA	NA	Not tested	Not tested	NA	NA	NA	3,4
W103	LTRI-278	JAN (7) 2019	pre-COVID-19	NASOP	Negative for A B RSV	NA	NA	NA	NA	NA	Not tested	Not tested	NA	NA	NA	3,4
W104	LTRI-279	JAN (7) 2019	pre-COVID-19	NASOP	Negative for A B RSV	NA	NA	NA	NA	NA	Not tested	Not tested	NA	NA	NA	3,4
W105	LTRI-280	JAN (7) 2019	pre-COVID-19	NASOP	Negative for A B RSV	NA	NA	NA	NA	NA	Not tested	Not tested	NA	NA	NA	3,4
W106	LTRI-281	JAN (7) 2019	pre-COVID-19	NASOP	Negative for A B RSV	NA	NA	NA	NA	NA	Not tested	Not tested	NA	NA	NA	3,4
W107	LTRI-282	JAN (7) 2019	pre-COVID-19	NASOP	Negative for A B RSV	NA	NA	NA	NA	NA	Not tested	Not tested	NA	NA	NA	3,4
W108	LTRI-283	JAN (7) 2019	pre-COVID-19	NASOP	Negative for A B RSV	NA	NA	NA	NA	NA	Not tested	Not tested	NA	NA	NA	3,4
W109	LTRI-284	JAN (7) 2019	pre-COVID-19	NASOP	Negative for A B RSV	NA	NA	NA	NA	NA	Not tested	Not tested	NA	NA	NA	3,4
W110	LTRI-285	JAN (7) 2019	pre-COVID-19	NASOP	Negative for A B RSV	NA	NA	NA	NA	NA	Not tested	Not tested	NA	NA	NA	3,4
W111	LTRI-286	JAN (7) 2019	pre-COVID-19	NASOP	Negative for A B RSV	NA	NA	NA	NA	NA	Not tested	Not tested	NA	NA	NA	3,4
W112	LTRI-287	JAN (7) 2019	pre-COVID-19	NASOP	Negative for A B RSV	NA	NA	NA	NA	NA	Not tested	Not tested	NA	NA	NA	3,4
W113	LTRI-288	JAN (7) 2019	pre-COVID-19	NASOP	Negative for A B RSV	NA	NA	NA	NA	NA	Not tested	Not tested	NA	NA	NA	3,4
W114	LTRI-289	JAN (7) 2019	pre-COVID-19	NASOP	Negative for A B RSV	NA	NA	NA	NA	NA	Not tested	Not tested	NA	NA	NA	3,4
W115	LTRI-290	JAN (7) 2019	pre-COVID-19	NASOP	Negative for A B RSV	NA	NA	NA	NA	NA	Not tested	Not tested	NA	NA	NA	3,4
W116	LTRI-291	JAN (7) 2019	pre-COVID-19	NASOP	Negative for A B RSV	NA	NA	NA	NA	NA	Not tested	Not tested	NA	NA	NA	3,4
W117	LTRI-292	JAN (7) 2019	pre-COVID-19	NASOP	Negative for A B RSV	NA	NA	NA	NA	NA	Not tested	Not tested	NA	NA	NA	3,4
W118	LTRI-293	JAN (7) 2019	pre-COVID-19	NASOP	Negative for A B RSV	NA	NA	NA	NA	NA	Not tested	Not tested	NA	NA	NA	3,4
W119	LTRI-294	JAN (7) 2019	pre-COVID-19	NASOP	Negative for A B RSV	NA	NA	NA	NA	NA	Not tested	Not tested	NA	NA	NA	3,4
W120	LTRI-295	JAN (7) 2019	pre-COVID-19	BAL	Negative for A B RSV	NA	NA	NA	NA	NA	Not tested	Not tested	NA	NA	NA	3,4
W121	LTRI-296	JAN (7) 2019	pre-COVID-19	NASOP	Negative for A B RSV	NA	NA	NA	NA	NA	Not tested	Not tested	NA	NA	NA	3,4
W122	LTRI-297	JAN (7) 2019	pre-COVID-19	NASOP	Negative for A B RSV	NA	NA	NA	NA	NA	Not tested	Not tested	NA	NA	NA	3,4
W123	LTRI-298	JAN (7) 2019	pre-COVID-19	BAL	Negative for A B RSV	NA	NA	NA	NA	NA	Not tested	Not tested	NA	NA	NA	3,4
W124	LTRI-299	JAN (7) 2019	pre-COVID-19	NASOP	Negative for A B RSV	NA	NA	NA	NA	NA	Not tested	Not tested	NA	NA	NA	3,4
W125	LTRI-300	JAN (7) 2019	pre-COVID-19	NASOP	Negative for A B RSV	NA	NA	NA	NA	NA	Not tested	Not tested	NA	NA	NA	3,4
W126	LTRI-301	JAN (7) 2019	pre-COVID-19	NASOP	Negative for A B RSV	NA	NA	NA	NA	NA	Not tested	Not tested	NA	NA	NA	3,4
W127	LTRI-302	JAN (7) 2019	pre-COVID-19	NASOP	Negative for A B RSV	NA	NA	NA	NA	NA	Not tested	Not tested	NA	NA	NA	3,4
W128	LTRI-303	JAN (7) 2019	pre-COVID-19	NASOP	Negative for A B RSV	NA	NA	NA	NA	NA	Not tested	Not tested	NA	NA	NA	3,4
W129	LTRI-304	JAN (7) 2019	pre-COVID-19	BAL	Negative for A B RSV	NA	NA	NA	NA	NA	Not tested	Not tested	NA	NA	NA	3,4
W130	LTRI-305	JAN (7) 2019	pre-COVID-19	NASOP	Negative for A B RSV	NA	NA	NA	NA	NA	Not tested	Not tested	NA	NA	NA	3,4
W131	LTRI-306	JAN (7) 2019	pre-COVID-19	NASOP	Negative for A B RSV	NA	NA	NA	NA	NA	Not tested	Not tested	NA	NA	NA	3,4
W132	LTRI-307	JAN (7) 2019	pre-COVID-19	NASOP	Negative for A B RSV	NA	NA	NA	NA	NA	Not tested	Not tested	NA	NA	NA	3,4
W133	LTRI-308	JAN (7) 2019	pre-COVID-19	NASOP	Negative for A B RSV	NA	NA	NA	NA	NA	Not tested	Not tested	NA	NA	NA	3,4
W134	LTRI-309	JAN (7) 2019	pre-COVID-19	NASOP	Negative for A B RSV	NA	NA	NA	NA	NA	Not tested	Not tested	NA	NA	NA	3,4
W135	LTRI-310	JAN (7) 2019	pre-COVID-19	NASOP	Negative for A B RSV	NA	NA	NA	NA	NA	Not tested	Not tested	NA	NA	NA	3,4
W136	LTRI-311	JAN (7) 2019	pre-COVID-19	NASOP	Negative for A B RSV	NA	NA	NA	NA	NA	Not tested	Not tested	NA	NA	NA	3,4
W137	LTRI-312	JAN (7) 2019	pre-COVID-19	NASOP	Negative for A B RSV	NA	NA	NA	NA	NA	Not tested	Not tested	NA	NA	NA	3,4
W138	LTRI-313	JAN (7) 2019	pre-COVID-19	NASOP	Negative for A B RSV	NA	NA	NA	NA	NA	Not tested	Not tested	NA	NA	NA	3,4
W139	LTRI-314	JAN (7) 2019	pre-COVID-19	BAL	Negative for A B RSV	NA	NA	NA	NA	NA	Not tested	Not tested	NA	NA	NA	3,4
W140	LTRI-315	JAN (7) 2019	pre-COVID-19	NASOP	Negative for A B RSV	NA	NA	NA	NA	NA	Not tested	Not tested	NA	NA	NA	3,4
W141	LTRI-316	JAN (7) 2019	pre-COVID-19	NASOP	Negative for A B RSV	NA	NA	NA	NA	NA	Not tested	Not tested	NA	NA	NA	3,4
W142	LTRI-317	JAN (7) 2019	pre-COVID-19	NASOP	Negative for A B RSV	NA	NA	NA	NA	NA	Not tested	Not tested	NA	NA	NA	3,4
W143	LTRI-318	JAN (7) 2019	pre-COVID-19	NASOP	Negative for A B RSV	NA	NA	NA	NA	NA	Not tested	Not tested	NA	NA	NA	3,4
W144	LTRI-319	JAN (7) 2019	pre-COVID-19	NASOP	Negative for A B RSV	NA	NA	NA	NA	NA	Not tested	Not tested	NA	NA	NA	3,4
W145	LTRI-320	JAN (7) 2019	pre-COVID-19	NASOP	Negative for A B RSV	NA	NA	NA	NA	NA	Not tested	Not tested	NA	NA	NA	3,4
W146	LTRI-321	JAN (7) 2019	pre-COVID-19	NASOP	Negative for A B RSV	NA	NA	NA	NA	NA	Not tested	Not tested	NA	NA	NA	3,4
W147	LTRI-322	JAN (7) 2019	pre-COVID-19	BAL	Negative for A B RSV	NA	NA	NA	NA	NA	Not tested	Not tested	NA	NA	NA	3,4
W148	LTRI-323	JAN (7) 2019	pre-COVID-19	NASOP	Negative for A B RSV	NA	NA	NA	NA	NA	Not tested	Not tested	NA	NA	NA	3,4
W149	LTRI-324	JAN (7) 2019	pre-COVID-19	NASOP	Negative for A B RSV	NA	NA	NA	NA	NA	Not tested	Not tested	NA	NA	NA	3,4
W150	LTRI-325	JAN (7) 2019	pre-COVID-19	BAL	Negative for A B RSV	NA	NA	NA	NA	NA	Not tested	Not tested	NA	NA	NA	3,4
W151	LTRI-326	JAN (7) 2019	pre-COVID-19	NASOP	Negative for A B RSV	NA	NA	NA	NA	NA	Not tested	Not tested	NA	NA	NA	3,4
W152	LTRI-327	JAN (7) 2019	pre-COVID-19	NASOP	Negative for A B RSV	NA	NA	NA	NA	NA	Not tested	Not tested	NA	NA	NA	3,4
W153	LTRI-328	JAN (7) 2019	pre-COVID-19	BAL	Negative for A B RSV	NA	NA	NA	NA	NA	Not tested	Not tested	NA	NA	NA	3,4
W154	LTRI-329	JAN (7) 2019	pre-COVID-19	BAL	Negative for A B RSV	NA	NA	NA	NA	NA	Not tested	Not tested	NA	NA	NA	3,4
W155	LTRI-330	JAN (7) 2019	pre-COVID-19	NASOP	Negative for A B RSV	NA	NA	NA	NA	NA	Not tested	Not tested	NA	NA	NA	3,4
W156	LTRI-331	JAN (7) 2019	pre-COVID-19	NASOP	Negative for A B RSV	NA	NA	NA	NA	NA	Not tested	Not tested	NA	NA	NA	3,4
W157	LTRI-332	JAN (7) 2019	pre-COVID-19	NASOP	Negative for A B RSV	NA	NA	NA	NA	NA	Not tested	Not tested	NA	NA	NA	3,4
W158	LTRI-333	JAN (7) 2019	pre-COVID-19	NASOP	Negative for A B RSV	NA	NA	NA	NA	NA	Not tested	Not tested	NA	NA	NA	3,4
W159	LTRI-334	JAN (7) 2019	pre-COVID-19	NASOP	Negative for A B RSV	NA	NA	NA	NA	NA	Not tested	Not tested	NA	NA	NA	3,4
W160	LTRI-335	JAN (7) 2019	pre-COVID-19	NASOP	Negative for A B RSV	NA	NA	NA	NA	NA	Not tested	Not tested	NA	NA	NA	3,4
W161	LTRI-336	JAN (7) 2019	pre-COVID-19	NASOP	Negative for A B RSV	NA	NA	NA	NA	NA	Not tested	Not tested	NA	NA	NA	3,4
W162	LTRI-337	JAN (7) 2019	pre-COVID-19	NASOP	Negative for A B RSV	NA	NA	NA	NA	NA	Not tested	Not tested	NA	NA	NA	3,4
W163	LTRI-338	JAN (7) 2019	pre-COVID-19	NASOP	Negative for A B RSV	NA	NA	NA	NA	NA	Not tested	Not tested	NA	NA	NA	3,4
W164	LTRI-339	JAN (7) 2019	pre-COVID-19	NASOP	Negative for A B RSV	NA	NA	NA	NA	NA	Not tested	Not tested	NA	NA	NA	3,4
W165	LTRI-340	JAN (7) 2019	pre-COVID-19	NASOP	Negative for A B RSV	NA	NA	NA	NA	NA	Not tested	Not tested	NA	NA	NA	3,4
W166	LTRI-341	JAN (7) 2019	pre-COVID-19	NASOP	Negative for A B RSV	NA	NA	NA	NA	NA	Not tested	Not tested	NA	NA	NA	3,4
W167	LTRI-342	JAN (7) 2019	pre-COVID-19	NASOP	Negative for A B RSV	NA	NA	NA	NA	NA	Not tested	Not tested	NA	NA	NA	3,4
W168	LTRI-343	JAN (7) 2019	pre-COVID-19	BAL	Negative for A B RSV	NA	NA	NA	NA	NA	Not tested	Not tested	NA	NA	NA	3,4
W193	LTRI-344	JAN (7) 2019	pre-COVID-19	NASOP	Negative for A B RSV	NA	NA	NA	NA	NA	Not tested	Not tested	NA	NA	NA	3,4
W194	LTRI-345	JAN (7) 2019	pre-COVID-19	NASOP	Negative for A B RSV	NA	NA	NA	NA	NA	Not tested	Not tested	NA	NA	NA	3,4
W195	LTRI-346	JAN (7) 2019	pre-COVID-19	NASOP	Negative for A B RSV	NA	NA	NA	NA	NA	Not tested	Not tested	NA	NA	NA	3,4
W196	LTRI-347	JAN (7) 2019	pre-COVID-19	NASOP	Negative for A B RSV	NA	NA	NA	NA	NA	Not tested	Not tested	NA	NA	NA	3,4
W197	LTRI-348	JAN (7) 2019	pre-COVID-19	NASOP	Negative for A B RSV	NA	NA	NA	NA	NA	Not tested	Not tested	NA	NA	NA	3,4
W198	LTRI-349	JAN (7) 2019	pre-COVID-19	NASOP	Negative for A B RSV	NA	NA	NA	NA	NA	Not tested	Not tested	NA	NA	NA	3,4
W199	LTRI-350	JAN (7) 2019	pre-COVID-19	NASOP	Negative for A B RSV	NA	NA	NA	NA	NA	Not tested	Not tested	NA	NA	NA	3,4
W200	LTRI-351	JAN (7) 2019	pre-COVID-19	NASOP	Negative for A B RSV	NA	NA	NA	NA	NA	Not tested	Not tested	NA	NA	NA	3,4
W201	LTRI-352	JAN (7) 2019	pre-COVID-19	NASOP	Negative for A B RSV	NA	NA	NA	NA	NA	Not tested	Not tested	NA	NA	NA	3,4
W202	LTRI-353	JAN (7) 2019	pre-COVID-19	BAL	Negative for A B RSV	NA	NA	NA	NA	NA	Not tested	Not tested	NA	NA	NA	3,4
W203	LTRI-354	JAN (7) 2019	pre-COVID-19	NASOP	Negative for A B RSV	NA	NA	NA	NA	NA	Not tested	Not tested	NA	NA	NA	3,4
W204	LTRI-355	JAN (7) 2019	pre-COVID-19	NASOP	Negative for A B RSV	NA	NA	NA	NA	NA	Not tested	Not tested	NA	NA	NA	3,4
W205	LTRI-356	JAN (7) 2019	pre-COVID-19	NASOP	Negative for A B RSV	NA	NA	NA	NA	NA	Not tested	Not tested	NA	NA	NA	3,4
W206	LTRI-357	JAN (7) 2019	pre-COVID-19	NASOP	Negative for A B RSV	NA	NA	NA	NA	NA	Not tested	Not tested	NA	NA	NA	3,4
W207	LTRI-358	JAN (7) 2019	pre-COVID-19	NASOP	Negative for A B RSV	NA	NA	NA	NA	NA	Not tested	Not tested	NA	NA	NA	3,4
W208	LTRI-359	JAN (7) 2019	pre-COVID-19	BAL	Negative for A B RSV	NA	NA	NA	NA	NA	Not tested	Not tested	NA	NA	NA	3,4
W209	LTRI-360	JAN (7) 2019	pre-COVID-19	NASOP	Negative for A B RSV	NA	NA	NA	NA	NA	Not tested	Not tested	NA	NA	NA	3,4
W210	LTRI-361	JAN (7) 2019	pre-COVID-19	NASOP	Negative for A B RSV	NA	NA	NA	NA	NA	Not tested	Not tested	NA	NA	NA	3,4
W211	LTRI-362	JAN (7) 2019	pre-COVID-19	NASOP	Negative for A B RSV	NA	NA	NA	NA	NA	Not tested	Not tested	NA	NA	NA	3,4
W212	LTRI-363	JAN (7) 2019	pre-COVID-19	NASOP	Negative for A B RSV	NA	NA	NA	NA	NA	Not tested	Not tested	NA	NA	NA	3,4
W213	LTRI-364	JAN (7) 2019	pre-COVID-19	NASOP	Negative for A B RSV	NA	NA	NA	NA	NA	Not tested	Not tested	NA	NA	NA	3,4
W214	LTRI-365	JAN (7) 2019	pre-COVID-19	NASOP	Negative for A B RSV	NA	NA	NA	NA	NA	Not tested	Not tested	NA	NA	NA	3,4
W215	LTRI-366	JAN (7) 2019	pre-COVID-19	NASOP	Negative for A B RSV	NA	NA	NA	NA	NA	Not tested	Not tested	NA	NA	NA	3,4
W216	LTRI-367	JAN (7) 2019	pre-COVID-19	NASOP	Negative for A B RSV	NA	NA	NA	NA	NA	Not tested	Not tested	NA	NA	NA	3,4
W217	LTRI-368	JAN (7) 2019	pre-COVID-19	NASOP	Negative for A B RSV	NA	NA	NA	NA	NA	Not tested	Not tested	NA	NA	NA	3,4
W218	LTRI-369	JAN (7) 2019	pre-COVID-19	NASOP	Negative for A B RSV	NA	NA	NA	NA	NA	Not tested	Not tested	NA	NA	NA	3,4
W219	LTRI-370	JAN (7) 2019	pre-COVID-19	NASOP	Negative for A B RSV	NA	NA	NA	NA	NA	Not tested	Not tested	NA	NA	NA	3,4
W220	LTRI-371	JAN (7) 2019	pre-COVID-19	NASOP	Negative for A B RSV	NA	NA	NA	NA	NA	Not tested	Not tested	NA	NA	NA	3,4
W221	LTRI-372	JAN (7) 2019	pre-COVID-19	NASOP	Negative for A B RSV	NA	NA	NA	NA	NA	Not tested	Not tested	NA	NA	NA	3,4
W222	LTRI-373	JAN (7) 2019	pre-COVID-19	NASOP	Negative for A B RSV	NA	NA	NA	NA	NA	Not tested	Not tested	NA	NA	NA	3,4
W223	LTRI-374	JAN (7) 2019	pre-COVID-19	NASOP	Negative for A B RSV	NA	NA	NA	NA	NA	Not tested	Not tested	NA	NA	NA	3,4
W224	LTRI-375	JAN (7) 2019	pre-COVID-19	NASOP	Negative for A B RSV	NA	NA	NA	NA	NA	Not tested	Not tested	NA	NA	NA	3,4
W225	LTRI-376	JAN (7) 2019	pre-COVID-19	NASOP	Negative for A B RSV	NA	NA	NA	NA	NA	Not tested	Not tested	NA	NA	NA	3,4
W226	LTRI-377	JAN (7) 2019	pre-COVID-19	NASOP	Negative for A B RSV	NA	NA	NA	NA	NA	Not tested	Not tested	NA	NA	NA	3,4
W227	LTRI-378	JAN (7) 2019	pre-COVID-19	NASOP	Negative for A B RSV	NA	NA	NA	NA	NA	Not tested	Not tested	NA	NA	NA	3,4
W228	LTRI-379	JAN (7) 2019	pre-COVID-19	NASOP	Negative for A B RSV	NA	NA	NA	NA	NA	Not tested	Not tested	NA	NA	NA	3,4
W229	LTRI-380	JAN (7) 2019	pre-COVID-19	NASOP	Negative for A B RSV	NA	NA	NA	NA	NA	Not tested	Not tested	NA	NA	NA	3,4
W230	LTRI-381	JAN (7) 2019	pre-COVID-19	NASOP	Negative for A B RSV	NA	NA	NA	NA	NA	Not tested	Not tested	NA	NA	NA	3,4
W231	LTRI-382	JAN (7) 2019	pre-COVID-19	NASOP	Negative for A B RSV	NA	NA	NA	NA	NA	Not tested	Not tested	NA	NA	NA	3,4
W232	LTRI-383	JAN (7) 2019	pre-COVID-19	NASOP	Negative for A B RSV	NA	NA	NA	NA	NA	Not tested	Not tested	NA	NA	NA	3,4
W233	LTRI-384	JAN (7) 2019	pre-COVID-19	NASOP	Negative for A B RSV	NA	NA	NA	NA	NA	Not tested	Not tested	NA	NA	NA	3,4
W234	LTRI-385	JAN (7) 2019	pre-COVID-19	NASOP	Negative for A B RSV	NA	NA	NA	NA	NA	Not tested	Not tested	NA	NA	NA	3,4
W235	LTRI-386	JAN (7) 2019	pre-COVID-19	NASOP	Negative for A B RSV	NA	NA	NA	NA	NA	Not tested	Not tested	NA	NA	NA	3,4
W236	LTRI-387	JAN (7) 2019	pre-COVID-19	NASOP	Negative for A B RSV	NA	NA	NA	NA	NA	Not tested	Not tested	NA	NA	NA	3,4
W237	LTRI-388	JAN (7) 2019	pre-COVID-19	NASOP	Negative for A B RSV	NA	NA	NA	NA	NA	Not tested	Not tested	NA	NA	NA	3,4
W238	LTRI-389	JAN (7) 2019	pre-COVID-19	NASOP	Negative for A B RSV	NA	NA	NA	NA	NA	Not tested	Not tested	NA	NA	NA	3,4
W239	LTRI-390	JAN (7) 2019	pre-COVID-19	NASOP	Negative for A B RSV	NA	NA	NA	NA	NA	Not tested	Not tested	NA	NA	NA	3,4
W240	LTRI-391	JAN (7) 2019	pre-COVID-19	NASOP	Negative for A B RSV	NA	NA	NA	NA	NA	Not tested	Not tested	NA	NA	NA	3,4
W241	LTRI-392	NOV (29) 2019	pre-COVID-19	NASOP	Negative for A B RSV	NA	NA	NA	NA	NA	Not tested	Not tested	NA	NA	NA	3,4
W242	LTRI-393	NOV (29) 2019	pre-COVID-19	BAL	Negative for A B RSV	NA	NA	NA	NA	NA	Not tested	Not tested	NA	NA	NA	3,4
W243	LTRI-394	NOV (29) 2019	pre-COVID-19	BAL	Negative for A B RSV	NA	NA	NA	NA	NA	Not tested	Not tested	NA	NA	NA	3,4
W244	LTRI-395	NOV (29) 2019	pre-COVID-19	BAL	Negative for A B RSV	NA	NA	NA	NA	NA	Not tested	Not tested	NA	NA	NA	3,4
W245	LTRI-396	NOV (29) 2019	pre-COVID-19	BAL	Negative for A B RSV	NA	NA	NA	NA	NA	Not tested	Not tested	NA	NA	NA	3,4
W246	LTRI-397	NOV (29) 2019	pre-COVID-19	BAL	Negative for A B RSV	NA	NA	NA	NA	NA	Not tested	Not tested	NA	NA	NA	3,4
W247	LTRI-398	NOV (29) 2019	pre-COVID-19	BAL	Negative for A B RSV	NA	NA	NA	NA	NA	Not tested	Not tested	NA	NA	NA	3,4
W248	LTRI-399	NOV (29) 2019	pre-COVID-19	BAL	Negative for A B RSV	NA	NA	NA	NA	NA	Not tested	Not tested	NA	NA	NA	3,4
W249	LTRI-400	NOV (29) 2019	pre-COVID-19	BAL	Negative for A B RSV	NA	NA	NA	NA	NA	Not tested	Not tested	NA	NA	NA	3,4
W250	LTRI-401	NOV (29) 2019	pre-COVID-19	BAL	Negative for A B RSV	NA	NA	NA	NA	NA	Not tested	Not tested	NA	NA	NA	3,4
W251	LTRI-402	NOV (29) 2019	pre-COVID-19	BAL	Negative for A B RSV	NA	NA	NA	NA	NA	Not tested	Not tested	NA	NA	NA	3,4
W252	LTRI-403	NOV (29) 2019	pre-COVID-19	BAL	Influenza B virus	NA	NA	NA	NA	NA	Not tested	Not tested	NA	NA	NA	3,4
W253	LTRI-404	NOV (29) 2019	pre-COVID-19	BAL	Negative for A B RSV	NA	NA	NA	NA	NA	Not tested	Not tested	NA	NA	NA	3,4
W254	LTRI-405	NOV (29) 2019	pre-COVID-19	BAL	Negative for A B RSV	NA	NA	NA	NA	NA	Not tested	Not tested	NA	NA	NA	3,4
W255	LTRI-406	NOV (29) 2019	pre-COVID-19	BAL	Negative for A B RSV	NA	NA	NA	NA	NA	Not tested	Not tested	NA	NA	NA	3,4
W256	LTRI-407	NOV (29) 2019	pre-COVID-19	BAL	Negative for A B RSV	NA	NA	NA	NA	NA	Not tested	Not tested	NA	NA	NA	3,4
W257	LTRI-408	NOV (29) 2019	pre-COVID-19	NASOP	Negative for A B RSV	NA	NA	NA	NA	NA	Not tested	Not tested	NA	NA	NA	3,4
W258	LTRI-409	NOV (29) 2019	pre-COVID-19	BAL	Negative for A B RSV	NA	NA	NA	NA	NA	Not tested	Not tested	NA	NA	NA	3,4
W259	LTRI-410	NOV (29) 2019	pre-COVID-19	BAL	Negative for A B RSV	NA	NA	NA	NA	NA	Not tested	Not tested	NA	NA	NA	3,4
W260	LTRI-411	NOV (29) 2019	pre-COVID-19	BAL	Negative for A B RSV	NA	NA	NA	NA	NA	Not tested	Not tested	NA	NA	NA	3,4
W261	LTRI-412	NOV (29) 2019	pre-COVID-19	BAL	Negative for A B RSV	NA	NA	NA	NA	NA	Not tested	Not tested	NA	NA	NA	3,4
W262	LTRI-413	NOV (29) 2019	pre-COVID-19	NASOP	Respiratory syncytial virus	NA	NA	NA	NA	NA	Not tested	Not tested	NA	NA	NA	3,4
W263	LTRI-414	NOV (29) 2019	pre-COVID-19	BAL	Negative for A B RSV	NA	NA	NA	NA	NA	Not tested	Not tested	NA	NA	NA	3,4
W264	LTRI-415	NOV (29) 2019	pre-COVID-19	BAL	Negative for A B RSV	NA	NA	NA	NA	NA	Not tested	Not tested	NA	NA	NA	3,4
W289	LTRI-416	NOV (29) 2019	pre-COVID-19	BAL	Negative for A B RSV	NA	NA	NA	NA	NA	Not tested	Not tested	NA	NA	NA	3,4
W290	LTRI-417	NOV (29) 2019	pre-COVID-19	NASOP	Negative for A B RSV	NA	NA	NA	NA	NA	Not tested	Not tested	NA	NA	NA	3,4
W291	LTRI-418	NOV (29) 2019	pre-COVID-19	NASOP	Respiratory syncytial virus	NA	NA	NA	NA	NA	Not tested	Not tested	NA	NA	NA	3,4
W292	LTRI-419	NOV (29) 2019	pre-COVID-19	BAL	Negative for A B RSV	NA	NA	NA	NA	NA	Not tested	Not tested	NA	NA	NA	3,4
W293	LTRI-420	NOV (29) 2019	pre-COVID-19	BAL	Negative for A B RSV	NA	NA	NA	NA	NA	Not tested	Not tested	NA	NA	NA	3,4
W294	LTRI-421	NOV (29) 2019	pre-COVID-19	BAL	Negative for A B RSV	NA	NA	NA	NA	NA	Not tested	Not tested	NA	NA	NA	3,4
W295	LTRI-422	NOV (29) 2019	pre-COVID-19	BAL	Negative for A B RSV	NA	NA	NA	NA	NA	Not tested	Not tested	NA	NA	NA	3,4
W296	LTRI-423	NOV (29) 2019	pre-COVID-19	BALCF	Negative for A B RSV	NA	NA	NA	NA	NA	Not tested	Not tested	NA	NA	NA	3,4
W297	LTRI-424	NOV (29) 2019	pre-COVID-19	BAL	Negative for A B RSV	NA	NA	NA	NA	NA	Not tested	Not tested	NA	NA	NA	3,4
W298	LTRI-425	NOV (29) 2019	pre-COVID-19	NASOP	Negative for A B RSV	NA	NA	NA	NA	NA	Not tested	Not tested	NA	NA	NA	3,4
W299	LTRI-426	NOV (29) 2019	pre-COVID-19	BAL	Negative for A B RSV	NA	NA	NA	NA	NA	Not tested	Not tested	NA	NA	NA	3,4
W300	LTRI-427	NOV (29) 2019	pre-COVID-19	BAL	Negative for A B RSV	NA	NA	NA	NA	NA	Not tested	Not tested	NA	NA	NA	3,4
W301	LTRI-428	NOV (29) 2019	pre-COVID-19	BAL	Negative for A B RSV	NA	NA	NA	NA	NA	Not tested	Not tested	NA	NA	NA	3,4
W302	LTRI-429	NOV (29) 2019	pre-COVID-19	BAL	Negative for A B RSV	NA	NA	NA	NA	NA	Not tested	Not tested	NA	NA	NA	3,4
W303	LTRI-430	NOV (29) 2019	pre-COVID-19	BAL	Negative for A B RSV	NA	NA	NA	NA	NA	Not tested	Not tested	NA	NA	NA	3,4
W304	LTRI-431	NOV (29) 2019	pre-COVID-19	NASOP	Negative for A B RSV	NA	NA	NA	NA	NA	Not tested	Not tested	NA	NA	NA	3,4
W305	LTRI-432	NOV (29) 2019	pre-COVID-19	BAL	Negative for A B RSV	NA	NA	NA	NA	NA	Not tested	Not tested	NA	NA	NA	3,4
W306	LTRI-433	NOV (29) 2019	pre-COVID-19	NASOP	Respiratory syncytial virus	NA	NA	NA	NA	NA	Not tested	Not tested	NA	NA	NA	3,4
W307	LTRI-434	NOV (29) 2019	pre-COVID-19	NASOP	Negative for A B RSV	NA	NA	NA	NA	NA	Not tested	Not tested	NA	NA	NA	3,4
W308	LTRI-435	NOV (29) 2019	pre-COVID-19	NASOP	Negative for A B RSV	NA	NA	NA	NA	NA	Not tested	Not tested	NA	NA	NA	3,4
W309	LTRI-436	NOV (29) 2019	pre-COVID-19	BAL	Negative for A B RSV	NA	NA	NA	NA	NA	Not tested	Not tested	NA	NA	NA	3,4
W310	LTRI-437	NOV (29) 2019	pre-COVID-19	BAL	Negative for A B RSV	NA	NA	NA	NA	NA	Not tested	Not tested	NA	NA	NA	3,4
W311	LTRI-438	NOV (29) 2019	pre-COVID-19	BMSH	Negative for A B RSV	NA	NA	NA	NA	NA	Not tested	Not tested	NA	NA	NA	3,4
W312	LTRI-439	NOV (29) 2019	pre-COVID-19	BAL	Negative for A B RSV	NA	NA	NA	NA	NA	Not tested	Not tested	NA	NA	NA	3,4
W313	LTRI-440	NOV (29) 2019	pre-COVID-19	BAL	Negative for A B RSV	NA	NA	NA	NA	NA	Not tested	Not tested	NA	NA	NA	3,4
W314	LTRI-441	NOV (29) 2019	pre-COVID-19	BAL	Negative for A B RSV	NA	NA	NA	NA	NA	Not tested	Not tested	NA	NA	NA	3,4
W315	LTRI-442	NOV (29) 2019	pre-COVID-19	BAL	Negative for A B RSV	NA	NA	NA	NA	NA	Not tested	Not tested	NA	NA	NA	3,4
W316	LTRI-443	NOV (29) 2019	pre-COVID-19	BAL	Negative for A B RSV	NA	NA	NA	NA	NA	Not tested	Not tested	NA	NA	NA	3,4
W317	LTRI-444	NOV (29) 2019	pre-COVID-19	BAL	Negative for A B RSV	NA	NA	NA	NA	NA	Not tested	Not tested	NA	NA	NA	3,4
W318	LTRI-445	NOV (29) 2019	pre-COVID-19	BAL	Negative for A B RSV	NA	NA	NA	NA	NA	Not tested	Not tested	NA	NA	NA	3,4
W319	LTRI-446	NOV (29) 2019	pre-COVID-19	BAL	Negative for A B RSV	NA	NA	NA	NA	NA	Not tested	Not tested	NA	NA	NA	3,4
W320	LTRI-447	NOV (29) 2019	pre-COVID-19	NASOP	Negative for A B RSV	NA	NA	NA	NA	NA	Not tested	Not tested	NA	NA	NA	3,4
W321	LTRI-448	NOV (29) 2019	pre-COVID-19	BAL	Negative for A B RSV	NA	NA	NA	NA	NA	Not tested	Not tested	NA	NA	NA	3,4
W322	LTRI-449	NOV (29) 2019	pre-COVID-19	NASOP	Negative for A B RSV	NA	NA	NA	NA	NA	Not tested	Not tested	NA	NA	NA	3,4
W323	LTRI-450	NOV (29) 2019	pre-COVID-19	BAL	Negative for A B RSV	NA	NA	NA	NA	NA	Not tested	Not tested	NA	NA	NA	3,4
W324	LTRI-451	NOV (29) 2019	pre-COVID-19	NASOP	Negative for A B RSV	NA	NA	NA	NA	NA	Not tested	Not tested	NA	NA	NA	3,4
W325	LTRI-452	NOV (29) 2019	pre-COVID-19	BAL	Negative for A B RSV	NA	NA	NA	NA	NA	Not tested	Not tested	NA	NA	NA	3,4
W326	LTRI-453	NOV (29) 2019	pre-COVID-19	BAL	Negative for A B RSV	NA	NA	NA	NA	NA	Not tested	Not tested	NA	NA	NA	3,4
W327	LTRI-454	NOV (29) 2019	pre-COVID-19	BAL	Negative for A B RSV	NA	NA	NA	NA	NA	Not tested	Not tested	NA	NA	NA	3,4
W328	LTRI-455	NOV (29) 2019	pre-COVID-19	BAL	Negative for A B RSV	NA	NA	NA	NA	NA	Not tested	Not tested	NA	NA	NA	3,4
W329	LTRI-456	NOV (29) 2019	pre-COVID-19	NASOP	Negative for A B RSV	NA	NA	NA	NA	NA	Not tested	Not tested	NA	NA	NA	3,4
W330	LTRI-457	NOV (29) 2019	pre-COVID-19	BAL	Negative for A B RSV	NA	NA	NA	NA	NA	Not tested	Not tested	NA	NA	NA	3,4
W331	LTRI-458	NOV (29) 2019	pre-COVID-19	BAL	Negative for A B RSV	NA	NA	NA	NA	NA	Not tested	Not tested	NA	NA	NA	3,4
W332	LTRI-459	NOV (29) 2019	pre-COVID-19	BAL	Negative for A B RSV	NA	NA	NA	NA	NA	Not tested	Not tested	NA	NA	NA	3,4
W333	LTRI-460	NOV (29) 2019	pre-COVID-19	BAL	Negative for A B RSV	NA	NA	NA	NA	NA	Not tested	Not tested	NA	NA	NA	3,4
W334	LTRI-461	NOV (29) 2019	pre-COVID-19	BAL	Negative for A B RSV	NA	NA	NA	NA	NA	Not tested	Not tested	NA	NA	NA	3,4
W335	LTRI-462	NOV (29) 2019	pre-COVID-19	BAL	Negative for A B RSV	NA	NA	NA	NA	NA	Not tested	Not tested	NA	NA	NA	3,4
W336	LTRI-463	NOV (29) 2019	pre-COVID-19	BAL	Negative for A B RSV	NA	NA	NA	NA	NA	Not tested	Not tested	NA	NA	NA	3,4
W337	LTRI-464	NOV (29) 2019	pre-COVID-19	BAL	Negative for A B RSV	NA	NA	NA	NA	NA	Not tested	Not tested	NA	NA	NA	3,4
W338	LTRI-465	DEC (6) 2019	pre-COVID-19	BAL	Negative for A B RSV	NA	NA	NA	NA	NA	Not tested	Not tested	NA	NA	NA	3,4
W339	LTRI-466	DEC (6) 2019	pre-COVID-19	BAL	Negative for A B RSV	NA	NA	NA	NA	NA	Not tested	Not tested	NA	NA	NA	3,4
W340	LTRI-467	DEC (6) 2019	pre-COVID-19	BAL	Negative for A B RSV	NA	NA	NA	NA	NA	Not tested	Not tested	NA	NA	NA	3,4
W341	LTRI-468	DEC (6) 2019	pre-COVID-19	NASOP	Negative for A B RSV	NA	NA	NA	NA	NA	Not tested	Not tested	NA	NA	NA	3,4
W342	LTRI-469	DEC (6) 2019	pre-COVID-19	NASOP	Negative for A B RSV	NA	NA	NA	NA	NA	Not tested	Not tested	NA	NA	NA	3,4
W343	LTRI-470	DEC (6) 2019	pre-COVID-19	NASOP	Negative for A B RSV	NA	NA	NA	NA	NA	Not tested	Not tested	NA	NA	NA	3,4
W344	LTRI-471	DEC (6) 2019	pre-COVID-19	NASOP	Negative for A B RSV	NA	NA	NA	NA	NA	Not tested	Not tested	NA	NA	NA	3,4
W345	LTRI-472	DEC (6) 2019	pre-COVID-19	NASOP	Negative for A B RSV	NA	NA	NA	NA	NA	Not tested	Not tested	NA	NA	NA	3,4
W346	LTRI-473	DEC (6) 2019	pre-COVID-19	NASOP	Negative for A B RSV	NA	NA	NA	NA	NA	Not tested	Not tested	NA	NA	NA	3,4
W347	LTRI-474	DEC (6) 2019	pre-COVID-19	NASOP	Negative for A B RSV	NA	NA	NA	NA	NA	Not tested	Not tested	NA	NA	NA	3,4
W348	LTRI-475	DEC (6) 2019	pre-COVID-19	NASOP	Negative for A B RSV	NA	NA	NA	NA	NA	Not tested	Not tested	NA	NA	NA	3,4
W349	LTRI-476	DEC (6) 2019	pre-COVID-19	NNP	Negative for A B RSV	NA	NA	NA	NA	NA	Not tested	Not tested	NA	NA	NA	3,4
W350	LTRI-477	DEC (6) 2019	pre-COVID-19	NASOP	Negative for A B RSV	NA	NA	NA	NA	NA	Not tested	Not tested	NA	NA	NA	3,4
W351	LTRI-478	DEC (6) 2019	pre-COVID-19	BAL	Negative for A B RSV	NA	NA	NA	NA	NA	Not tested	Not tested	NA	NA	NA	3,4
W352	LTRI-479	DEC (6) 2019	pre-COVID-19	BAL	Negative for A B RSV	NA	NA	NA	NA	NA	Not tested	Not tested	NA	NA	NA	3,4
W353	LTRI-480	DEC (6) 2019	pre-COVID-19	BAL	Negative for A B RSV	NA	NA	NA	NA	NA	Not tested	Not tested	NA	NA	NA	3,4
W354	LTRI-481	DEC (6) 2019	pre-COVID-19	BAL	Negative for A B RSV	NA	NA	NA	NA	NA	Not tested	Not tested	NA	NA	NA	3,4
W355	LTRI-482	DEC (6) 2019	pre-COVID-19	NASOP	Negative for A B RSV	NA	NA	NA	NA	NA	Not tested	Not tested	NA	NA	NA	3,4
W356	LTRI-483	DEC (6) 2019	pre-COVID-19	BAL	Negative for A B RSV	NA	NA	NA	NA	NA	Not tested	Not tested	NA	NA	NA	3,4
W357	LTRI-484	DEC (6) 2019	pre-COVID-19	BAL	Negative for A B RSV	NA	NA	NA	NA	NA	Not tested	Not tested	NA	NA	NA	3,4
W358	LTRI-485	DEC (6) 2019	pre-COVID-19	BAL	Negative for A B RSV	NA	NA	NA	NA	NA	Not tested	Not tested	NA	NA	NA	3,4
W359	LTRI-486	DEC (6) 2019	pre-COVID-19	BAL	Negative for A B RSV	NA	NA	NA	NA	NA	Not tested	Not tested	NA	NA	NA	3,4
W360	LTRI-487	DEC (6) 2019	pre-COVID-19	BAL	Respiratory syncytial virus	NA	NA	NA	NA	NA	Not tested	Not tested	NA	NA	NA	3,4
W385	LTRI-776	May (12) 2020	post-COVID-19	NASOP	COVID-19 postive (not tested by 'Seegene assay')				22.53	21.91	Positive	Positive	62627.8	53264.9	Yes	3,4
W386	LTRI-777	May (12) 2020	post-COVID-19	NASOP	COVID-19 postive	22.23	24.12	22.92	25.72	21.85	Positive	Positive	7684.46	6535.62	Yes	3,4
W387	LTRI-778	May (12) 2020	post-COVID-19	NASOP	COVID-19 postive	26.91	28.27	29.85	30.51	26.1	Positive	Positive	329.81	280.503	Yes	3,4
W388	LTRI-779	May (12) 2020	post-COVID-19	NASOP	COVID-19 postive	21.22	23.07	23.74	24.03	24.35	Positive	Positive	23234.5	19760.9	Yes	3,4
W389	LTRI-780	May (12) 2020	post-COVID-19	NASOP	COVID-19 postive	ND	ND	39.23	33.19	22.63	Negative (Irregular CoV-2 curve)	Negative (Irregular CoV-2 curve)	NA	NA	No	3,4
W390	LTRI-781	May (12) 2020	post-COVID-19	NASOP	COVID-19 postive	25.98	27.19	26.17	26.57	26.11	Positive	Positive	4393.9	3737	Yes	3,4
W397	LTRI-788	May (12) 2020	post-COVID-19	NASOP	COVID-19 postive	ND	35.67	35.5	Un	24.26	Negative	Negative	0	0	No	3,4
W398	LTRI-789	May (12) 2020	post-COVID-19	NASOP	COVID-19 postive	19.45	20.44	19.97	24.84	21.74	Positive	Positive	13688.1	11641.7	Yes	3,4
W399	LTRI-790	May (12) 2020	post-COVID-19	NASOP	COVID-19 negative	ND	ND	38.97	Un	23.39	Negative	Negative	0	0	Yes	3,4
W400	LTRI-791	May (12) 2020	post-COVID-19	NASOP	COVID-19 postive	14.04	16.43	16.15	19.37	19.19	Positive	Positive	498565	424029	Yes	3,4
W401	LTRI-792	May (12) 2020	post-COVID-19	NASOP	COVID-19 postive	25.73	27.26	27.46	31.05	21	Positive	Positive	231.15	196.593	Yes	3,4
W402	LTRI-793	May (12) 2020	post-COVID-19	NASOP	COVID-19 postive	28.97	30.41	30.78	33.53	23.35	Positive	Positive	45.45	38.6551	Yes	3,4
W409	LTRI-800	May (12) 2020	post-COVID-19	NASOP	COVID-19 postive	25.03	25.64	27.04	32.59	21.62	Positive	Positive	84.01	71.4504	Yes	3,4
W410	LTRI-801	May (12) 2020	post-COVID-19	NASOP	COVID-19 postive	ND	ND	35.31	41.31	22.37	Negative (Irregular CoV-2 curve)	Negative (Irregular CoV-2 curve)	NA	NA	No	3,4
W411	LTRI-802	May (12) 2020	post-COVID-19	NASOP	COVID-19 postive	30.98	30.51	30.92	34.18	20.62	Positive	Positive	29.52	25.1067	Yes	3,4
W412	LTRI-803	May (12) 2020	post-COVID-19	NASOP	COVID-19 postive	30.98	30.51	30.92	33.64	20.78	Positive	Positive	42.08	35.789	Yes	3,4
W413	LTRI-804	May (12) 2020	post-COVID-19	NASOP	COVID-19 postive (not tested by 'Seegene assay')				28.13	27.01	Positive	Positive	1570.97	1336.11	Yes	3,4
W414	LTRI-805	May (12) 2020	post-COVID-19	NASOP	COVID-19 postive (not tested by 'Seegene assay')				31.74	21.3	Positive	Positive	146.82	124.87	Yes	3,4
W421	LTRI-812	May (12) 2020	post-COVID-19	NASOP	COVID-19 postive	ND	ND	37.84	Un	21.33	Negative	Negative	0	0	No	3,4
W422	LTRI-813	May (12) 2020	post-COVID-19	NASOP	COVID-19 postive	ND	35.53	35.04	Un	19.26	Negative	Negative	0	0	No	3,4
W423	LTRI-814	May (12) 2020	post-COVID-19	NASOP	COVID-19 postive	16.15	17.66	17.16	22.57	23.01	Positive	Positive	60664.8	51595.3	Yes	3,4
W424	LTRI-815	May (12) 2020	post-COVID-19	NASOP	COVID-19 postive	11.66	13.22	14.28	36.28	22.4	Positive	Negative	7.47	6.35322	Yes	3,4
W425	LTRI-816	May (12) 2020	post-COVID-19	NASOP	COVID-19 postive	31.92	33.3	35.42	24.86	24.59	Negative (Irregular CoV-2 curve)	Negative (Irregular CoV-2 curve)	NA	NA	No	3,4
W426	LTRI-817	May (12) 2020	post-COVID-19	NASOP	COVID-19 postive	14.04	16.13	16.44	22.78	20.62	Positive	Positive	52992.5	45070	Yes	3,4
W433	LTRI-824	May (12) 2020	post-COVID-19	NASOP	COVID-19 postive	29.11	30.76	32.44	33.21	26.31	Positive	Positive	56.1	47.713	Yes	3,4
W434	LTRI-825	May (12) 2020	post-COVID-19	NASOP	COVID-19 postive	ND	35.02	38.35	Un	23.65	Negative	Negative	0	0	No	3,4
W435	LTRI-826	May (12) 2020	post-COVID-19	NASOP	COVID-19 postive	21.95	23.44	24.83	26.1	21.9	Positive	Positive	5961.4	5070.16	Yes	3,4
W436	LTRI-827	May (12) 2020	post-COVID-19	NASOP	COVID-19 postive	ND	ND	39.38	Un	22.24	Negative	Negative	0	0	No	3,4
W437	LTRI-828	May (12) 2020	post-COVID-19	NASOP	COVID-19 postive	24.04	24.75	25.58	29.72	19.94	Positive	Positive	554.17	471.321	Yes	3,4
W438	LTRI-829	May (12) 2020	post-COVID-19	NASOP	COVID-19 postive	ND	36.38	36.55	Un	21.67	Negative	Negative	0	0	No	3,4
W445	LTRI-836	May (12) 2020	post-COVID-19	NASOP	COVID-19 postive	13.61	15.47	15.81	25.71	25.28	Positive	Positive	7744.67	6586.83	Yes	3,4
W446	LTRI-837	May (12) 2020	post-COVID-19	NASOP	COVID-19 postive	ND	ND	35.96	36.01	19.53	Negative (Irregular CoV-2 curve)	Negative (Irregular CoV-2 curve)	NA	NA	No	3,4
W447	LTRI-838	May (12) 2020	post-COVID-19	NASOP	COVID-19 postive	ND	ND	35.22	26.22	21.58	Negative (Irregular CoV-2 curve)	Negative (Irregular CoV-2 curve)	NA	NA	No	3,4
W448	LTRI-839	May (12) 2020	post-COVID-19	NASOP	COVID-19 postive	19.47	20.93	21.55	27.16	21.48	Positive	Positive	2982.86	2536.92	Yes	3,4
W449	LTRI-840	May (12) 2020	post-COVID-19	NASOP	COVID-19 postive	ND	ND	38.86	Un	23.4	Negative	Negative	0	0	No	3,4
W450	LTRI-841	May (12) 2020	post-COVID-19	NASOP	COVID-19 postive	ND	ND	37.02	17.11	23.36	Negative (Irregular CoV-2 curve)	Negative (Irregular CoV-2 curve)	NA	NA	No	3,4
W481	LTRI-848	May (12) 2020	post-COVID-19	NASOP	COVID-19 postive	ND	30.96	31.24	Un	25.38	Negative	Negative	0	0	No	3,4
W482	LTRI-849	May (12) 2020	post-COVID-19	NASOP	COVID-19 postive	ND	36.87	37.7	37.91	23.05	Negative	Negative	2.55	2.16877	No	3,4
W483	LTRI-850	May (12) 2020	post-COVID-19	NASOP	COVID-19 postive	18.55	20.15	21.21	23.69	21.37	Positive	Positive	29169.5	24808.6	Yes	3,4
W484	LTRI-851	May (12) 2020	post-COVID-19	NASOP	COVID-19 postive	ND	35.14	36.78	Un	24.44	Negative	Negative	0	0	No	3,4
W485	LTRI-852	May (12) 2020	post-COVID-19	NASOP	COVID-19 postive	33.37	34.14	35.15	37.94	23.45	Negative	Negative	2.51	2.13475	No	3,4
W486	LTRI-853	May (12) 2020	post-COVID-19	NASOP	COVID-19 postive	ND	ND	35.68	37.84	21.17	Negative	Negative	2.66	2.26233	No	3,4
W493	LTRI-860	May (12) 2020	post-COVID-19	NASOP	COVID-19 postive	27.19	28.12	29.31	33.61	27.49	Positive	Positive	42.93	36.5119	Yes	3,4
W494	LTRI-861	May (12) 2020	post-COVID-19	NASOP	COVID-19 postive	ND	ND	36.64	Un	21.91	Negative	Negative	0	0	No	3,4
W495	LTRI-862	May (12) 2020	post-COVID-19	NASOP	COVID-19 postive	ND	ND	36.15	32.97	21.53	Positive	Positive	65.67	55.8522	Yes	3,4
W496	LTRI-863	May (12) 2020	post-COVID-19	NASOP	COVID-19 postive	ND	33.61	33.46	37.93	21.19	Negative	Negative	2.52	2.14326	No	3,4
W497	LTRI-864	May (12) 2020	post-COVID-19	NASOP	COVID-19 postive	ND	ND	39.45	Un	22.4	Negative	Negative	0	0	No	3,4
W498	LTRI-865	May (12) 2020	post-COVID-19	NASOP	COVID-19 postive (not tested by 'Seegene assay')				23.17	19.9	Positive	Positive	41032.1	34897.7	Yes	3,4
W505	LTRI-872	May (12) 2020	post-COVID-19	NASOP	COVID-19 postive (not tested by 'Seegene assay')				30.24	21.37	Positive	Positive	393.94	335.045	Yes	3,4
W506	LTRI-873	May (12) 2020	post-COVID-19	NASOP	COVID-19 postive (not tested by 'Seegene assay')				30.03	21.66	Positive	Positive	452.04	384.459	Yes	3,4
W507	LTRI-874	May (12) 2020	post-COVID-19	NASOP	COVID-19 postive	14.63	16.26	15.79	22.3	22.36	Positive	Positive	72550.1	61703.7	Yes	3,4
W508	LTRI-875	May (12) 2020	post-COVID-19	NASOP	COVID-19 postive (not tested by 'Seegene assay')				31.17	22.97	Positive	Positive	213.08	181.224	Yes	3,4
W509	LTRI-876	May (12) 2020	post-COVID-19	NASOP	COVID-19 positive/Influenza testing not performed. Testing currently suspended.	30.57	32.39	32.94	34.72	22.88	Positive	Positive	20.81	17.6989	Yes	3,4
W510	LTRI-877	May (12) 2020	post-COVID-19	NASOP	COVID-19 postive	ND	31.98	32.71	33.8	22.56	Positive	Positive	38.08	32.387	Yes	3,4
W517	LTRI-884	May (12) 2020	post-COVID-19	NASOP	COVID-19 postive	ND	ND	36.44	Un	22.87	Negative	Negative	0	0	No	3,4
W518	LTRI-885	May (12) 2020	post-COVID-19	NASOP	COVID-19 postive	14.89	17.3	15.86	24.62	23.08	Positive	Positive	15841.2	13472.9	Yes	3,4
W519	LTRI-886	May (12) 2020	post-COVID-19	NASOP	COVID-19 postive	19.57	20.83	20.74	27.28	21.58	Positive	Positive	2756.72	2344.59	Yes	3,4
W520	LTRI-887	May (12) 2020	post-COVID-19	NASOP	COVID-19 postive	ND	ND	37.26	Un	23.24	Negative	Negative	0	0	No	3,4
W521	LTRI-888	May (12) 2020	post-COVID-19	NASOP	COVID-19 postive	27.86	29.14	29.85	36.03	23.28	Positive	Negative	8.79	7.47588	Yes	3,4
W522	LTRI-889	May (12) 2020	post-COVID-19	NASOP	COVID-19 postive	29.85	31.71	33.86	35.78	23.88	Positive	Negative	10.31	8.76864	Yes	3,4
W529	LTRI-896	May (12) 2020	post-COVID-19	NASOP	COVID-19 postive	ND	35.99	36.57	42.8	23.82	Negative	Negative	0.1	0.0850498	No	3,4
W530	LTRI-897	May (12) 2020	post-COVID-19	NASOP	COVID-19 postive	15.23	17.1	18.13	20.45	21.06	Positive	Positive	245632	208909	Yes	3,4
W531	LTRI-898	May (12) 2020	post-COVID-19	NASOP	COVID-19 postive	27.26	29.33	29.37	34.43	21.19	Positive	Positive	25.17	21.407	Yes	3,4
W532	LTRI-899	May (12) 2020	post-COVID-19	NASOP	COVID-19 postive	31.04	32.89	34.08	38.02	22.94	Negative	Negative	2.38	2.02419	No	3,4
W533	LTRI-900	May (12) 2020	post-COVID-19	NASOP	COVID-19 postive	ND	34.8	33.88	43.05	26.21	Negative	Negative	0.09	0.0765449	No	3,4
W534	LTRI-901	May (12) 2020	post-COVID-19	NASOP	COVID-19 postive	31.35	31.67	32.56	Un	24.95	Negative	Negative	0	0	No	3,4
W541	LTRI-908	May (12) 2020	post-COVID-19	NASOP	COVID-19 postive	21.27	22.28	22.76	26.61	21.49	Positive	Positive	4288.83	3647.64	Yes	3,4
W542	LTRI-909	May (12) 2020	post-COVID-19	NASOP	COVID-19 postive	ND	38.07	36.41	Un	21.88	Negative	Negative	0	0	No	3,4
W543	LTRI-910	May (12) 2020	post-COVID-19	NASOP	COVID-19 postive	ND	31.44	33.06	36.81	23.57	Positive	Negative	5.24	4.45661	Yes	3,4
W544	LTRI-911	May (12) 2020	post-COVID-19	NASOP	COVID-19 postive	26.34	27.93	27.07	32.44	21.21	Positive	Positive	92.88	78.9943	Yes	3,4
W545	LTRI-912	May (12) 2020	post-COVID-19	NASOP	COVID-19 postive (not tested by 'Seegene assay')				24.69	23.64	Positive	Positive	15073.3	12819.8	Yes	3,4
W546	LTRI-913	May (12) 2020	post-COVID-19	NASOP	COVID-19 postive (not tested by 'Seegene assay')				31.13	23.15	Positive	Positive	218.77	186.064	Yes	3,4
W601	LTRI-920	May (12) 2020	post-COVID-19	NASOP	COVID-19 postive	ND	34.64	36.2	40.46	23.31	Negative	Negative	0.48	0.408239	No	3,4
W602	LTRI-921	May (12) 2020	post-COVID-19	NASOP	COVID-19 postive	ND	34.64	36.2	Un	23.75	Negative	Negative	0	0	No	3,4
W603	LTRI-922	May (12) 2020	post-COVID-19	NASOP	COVID-19 postive	27.5	28.86	29.58	34.04	20.72	Positive	Positive	32.48	27.6242	Yes	3,4
W604	LTRI-923	May (12) 2020	post-COVID-19	NASOP	COVID-19 postive	22.93	25.41	26.21	33.95	22.98	Positive	Positive	34.51	29.3507	Yes	3,4
W605	LTRI-924	May (12) 2020	post-COVID-19	NASOP	COVID-19 postive	31.6	31.36	32.28	41.87	21.56	Negative	Negative	0.19	0.161595	No	3,4
W606	LTRI-925	May (12) 2020	post-COVID-19	NASOP	COVID-19 postive	ND	ND	37.98	Un	22.72	Negative	Negative	0	0	No	3,4
W613	LTRI-932	May (12) 2020	post-COVID-19	NASOP	COVID-19 postive (not tested by 'Seegene assay')				Un	22.94	Negative	Negative	0	0	No	3,4
W614	LTRI-933	May (12) 2020	post-COVID-19	NASOP	COVID-19 postive	ND	ND	38.72	Un	23.31	Negative	Negative	0	0	No	3,4
W615	LTRI-934	May (12) 2020	post-COVID-19	NASOP	COVID-19 postive	ND	33.97	33.12	37.93	19.55	Negative	Negative	2.52	2.14326	No	3,4
W616	LTRI-935	May (12) 2020	post-COVID-19	NASOP	COVID-19 postive	ND	36.11	36.82	37.84	20.28	Negative	Negative	2.67	2.27083	No	3,4
W617	LTRI-936	May (12) 2020	post-COVID-19	NASOP	COVID-19 postive	ND	ND	34.09	36.59	28.77	Positive	Negative	6.07	5.16252	Yes	3,4
W618	LTRI-937	May (12) 2020	post-COVID-19	NASOP	COVID-19 postive	24.08	25.87	25.99	31.57	22.29	Positive	Positive	164.03	139.507	Yes	3,4
W625	LTRI-944	May (12) 2020	post-COVID-19	NASOP	COVID-19 postive (not tested by 'Seegene assay')				23.44	24.17	Positive	Positive	34408.8	29264.6	Yes	3,4
W626	LTRI-945	May (12) 2020	post-COVID-19	NASOP	COVID-19 postive	14.74	16.75	15.96	20.22	19.76	Positive	Positive	285396	242729	Yes	3,4
W627	LTRI-946	May (12) 2020	post-COVID-19	NASOP	COVID-19 postive	28.3	28.72	29.63	34.05	20.63	Positive	Positive	32.22	27.4031	Yes	3,4
W628	LTRI-947	May (12) 2020	post-COVID-19	NASOP	COVID-19 postive	ND	32.96	32.8	36.04	22.53	Positive	Negative	8.71	7.40784	Yes	3,4
W629	LTRI-948	May (12) 2020	post-COVID-19	NASOP	COVID-19 postive	ND	31.99	32.3	37.71	23.58	Negative	Negative	2.9	2.46645	No	3,4
W630	LTRI-949	May (12) 2020	post-COVID-19	NASOP	COVID-19 postive	ND	ND	37.86	36.97	23.45	Positive	Negative	4.72	4.01435	Yes	3,4

## Sheet: Supplementary Table 7
Supplementary Table 7: Description of extended cohort
						'Seegene' qRT-PCR assay (Seegene Allplex™)			'BGI' qRT-PCR assay (Ct)
Barcodes	LTRI #	Date of Retreival	Collection time	Collection method	Diagnostic laboratory status	E	RdRp	N	RdRP	ACTB	Neg > 37, Pos < 37 (BGI)	Neg > 35, Pos < 35 (BGI)	Starting Quantity BGI output (copies/uL)	Sample Viral Load (copies/uL)	Cohort Group
W097	LTRI-200	JAN (9) 2019	pre-COVID-19	NASOP	Negative for A B RSV	NA	NA	NA	NA	NA	Not tested	Not tested	NA	NA	3,4
W098	LTRI-201	JAN (9) 2019	pre-COVID-19	NASOP	Negative for A B RSV	NA	NA	NA	NA	NA	Not tested	Not tested	NA	NA	3,4
W099	LTRI-202	JAN (9) 2019	pre-COVID-19	NASOP	Negative for A B RSV	NA	NA	NA	NA	NA	Not tested	Not tested	NA	NA	3,4
W100	LTRI-203	JAN (9) 2019	pre-COVID-19	NASOP	Negative for A B RSV	NA	NA	NA	NA	NA	Not tested	Not tested	NA	NA	3,4
W101	LTRI-204	JAN (9) 2019	pre-COVID-19	NASOP	Negative for A B RSV	NA	NA	NA	NA	NA	Not tested	Not tested	NA	NA	3,4
W102	LTRI-205	JAN (9) 2019	pre-COVID-19	NASOP	Negative for A B RSV	NA	NA	NA	NA	NA	Not tested	Not tested	NA	NA	3,4
W103	LTRI-206	JAN (9) 2019	pre-COVID-19	NASOP	Negative for A B RSV	NA	NA	NA	NA	NA	Not tested	Not tested	NA	NA	3,4
W104	LTRI-207	JAN (9) 2019	pre-COVID-19	NASOP	Negative for A B RSV	NA	NA	NA	NA	NA	Not tested	Not tested	NA	NA	3,4
W105	LTRI-208	JAN (9) 2019	pre-COVID-19	NASOP	Negative for A B RSV	NA	NA	NA	NA	NA	Not tested	Not tested	NA	NA	3,4
W106	LTRI-209	JAN (9) 2019	pre-COVID-19	NASOP	Negative for A B RSV	NA	NA	NA	NA	NA	Not tested	Not tested	NA	NA	3,4
W107	LTRI-210	JAN (9) 2019	pre-COVID-19	NASOP	Negative for A B RSV	NA	NA	NA	NA	NA	Not tested	Not tested	NA	NA	3,4
W108	LTRI-211	JAN (9) 2019	pre-COVID-19	NASOP	Negative for A B RSV	NA	NA	NA	NA	NA	Not tested	Not tested	NA	NA	3,4
W109	LTRI-212	JAN (9) 2019	pre-COVID-19	NASOP	Negative for A B RSV	NA	NA	NA	NA	NA	Not tested	Not tested	NA	NA	3,4
W110	LTRI-213	JAN (9) 2019	pre-COVID-19	NASOP	Negative for A B RSV	NA	NA	NA	NA	NA	Not tested	Not tested	NA	NA	3,4
W111	LTRI-214	JAN (9) 2019	pre-COVID-19	NASOP	Negative for A B RSV	NA	NA	NA	NA	NA	Not tested	Not tested	NA	NA	3,4
W112	LTRI-215	JAN (9) 2019	pre-COVID-19	NASOP	Negative for A B RSV	NA	NA	NA	NA	NA	Not tested	Not tested	NA	NA	3,4
W113	LTRI-216	JAN (9) 2019	pre-COVID-19	NASOP	Negative for A B RSV	NA	NA	NA	NA	NA	Not tested	Not tested	NA	NA	3,4
W114	LTRI-217	JAN (9) 2019	pre-COVID-19	NASOP	Negative for A B RSV	NA	NA	NA	NA	NA	Not tested	Not tested	NA	NA	3,4
W115	LTRI-218	JAN (9) 2019	pre-COVID-19	NASOP	Negative for A B RSV	NA	NA	NA	NA	NA	Not tested	Not tested	NA	NA	3,4
W116	LTRI-219	JAN (9) 2019	pre-COVID-19	NASOP	Negative for A B RSV	NA	NA	NA	NA	NA	Not tested	Not tested	NA	NA	3,4
W117	LTRI-220	JAN (9) 2019	pre-COVID-19	NASOP	Negative for A B RSV	NA	NA	NA	NA	NA	Not tested	Not tested	NA	NA	3,4
W118	LTRI-221	JAN (9) 2019	pre-COVID-19	NASOP	Negative for A B RSV	NA	NA	NA	NA	NA	Not tested	Not tested	NA	NA	3,4
W119	LTRI-222	JAN (9) 2019	pre-COVID-19	NASOP	Negative for A B RSV	NA	NA	NA	NA	NA	Not tested	Not tested	NA	NA	3,4
W120	LTRI-223	JAN (9) 2019	pre-COVID-19	NASOP	Negative for A B RSV	NA	NA	NA	NA	NA	Not tested	Not tested	NA	NA	3,4
W121	LTRI-224	JAN (9) 2019	pre-COVID-19	NASOP	Negative for A B RSV	NA	NA	NA	NA	NA	Not tested	Not tested	NA	NA	3,4
W122	LTRI-225	JAN (9) 2019	pre-COVID-19	NASOP	Negative for A B RSV	NA	NA	NA	NA	NA	Not tested	Not tested	NA	NA	3,4
W123	LTRI-226	JAN (9) 2019	pre-COVID-19	NASOP	Negative for A B RSV	NA	NA	NA	NA	NA	Not tested	Not tested	NA	NA	3,4
W124	LTRI-227	JAN (9) 2019	pre-COVID-19	BAL	Influenza A virus	NA	NA	NA	NA	NA	Not tested	Not tested	NA	NA	3,4
W125	LTRI-228	JAN (9) 2019	pre-COVID-19	NASOP	Negative for A B RSV	NA	NA	NA	NA	NA	Not tested	Not tested	NA	NA	3,4
W126	LTRI-229	JAN (9) 2019	pre-COVID-19	NASOP	Negative for A B RSV	NA	NA	NA	NA	NA	Not tested	Not tested	NA	NA	3,4
W127	LTRI-230	JAN (9) 2019	pre-COVID-19	NASOP	Negative for A B RSV	NA	NA	NA	NA	NA	Not tested	Not tested	NA	NA	3,4
W128	LTRI-231	JAN (9) 2019	pre-COVID-19	NASOP	Negative for A B RSV	NA	NA	NA	NA	NA	Not tested	Not tested	NA	NA	3,4
W129	LTRI-232	JAN (9) 2019	pre-COVID-19	NASOP	Negative for A B RSV	NA	NA	NA	NA	NA	Not tested	Not tested	NA	NA	3,4
W130	LTRI-233	JAN (9) 2019	pre-COVID-19	NASOP	Negative for A B RSV	NA	NA	NA	NA	NA	Not tested	Not tested	NA	NA	3,4
W131	LTRI-234	JAN (9) 2019	pre-COVID-19	BAL	Negative for A B RSV	NA	NA	NA	NA	NA	Not tested	Not tested	NA	NA	3,4
W132	LTRI-235	JAN (9) 2019	pre-COVID-19	NASOP	Negative for A B RSV	NA	NA	NA	NA	NA	Not tested	Not tested	NA	NA	3,4
W133	LTRI-236	JAN (9) 2019	pre-COVID-19	NASOP	Negative for A B RSV	NA	NA	NA	NA	NA	Not tested	Not tested	NA	NA	3,4
W134	LTRI-237	JAN (9) 2019	pre-COVID-19	NASOP	Negative for A B RSV	NA	NA	NA	NA	NA	Not tested	Not tested	NA	NA	3,4
W135	LTRI-238	JAN (9) 2019	pre-COVID-19	NASOP	Negative for A B RSV	NA	NA	NA	NA	NA	Not tested	Not tested	NA	NA	3,4
W136	LTRI-239	JAN (9) 2019	pre-COVID-19	NASOP	Respiratory syncytial virus	NA	NA	NA	NA	NA	Not tested	Not tested	NA	NA	3,4
W137	LTRI-240	JAN (9) 2019	pre-COVID-19	NASOP	Negative for A B RSV	NA	NA	NA	NA	NA	Not tested	Not tested	NA	NA	3,4
W138	LTRI-241	JAN (9) 2019	pre-COVID-19	BAL	Negative for A B RSV	NA	NA	NA	NA	NA	Not tested	Not tested	NA	NA	3,4
W139	LTRI-242	JAN (9) 2019	pre-COVID-19	BAL	Respiratory syncytial virus	NA	NA	NA	NA	NA	Not tested	Not tested	NA	NA	3,4
W140	LTRI-243	JAN (9) 2019	pre-COVID-19	BAL	Negative for A B RSV	NA	NA	NA	NA	NA	Not tested	Not tested	NA	NA	3,4
W141	LTRI-244	JAN (9) 2019	pre-COVID-19	NASOP	Negative for A B RSV	NA	NA	NA	NA	NA	Not tested	Not tested	NA	NA	3,4
W142	LTRI-245	JAN (9) 2019	pre-COVID-19	NASOP	Negative for A B RSV	NA	NA	NA	NA	NA	Not tested	Not tested	NA	NA	3,4
W143	LTRI-246	JAN (9) 2019	pre-COVID-19	NASOP	Negative for A B RSV	NA	NA	NA	NA	NA	Not tested	Not tested	NA	NA	3,4
W144	LTRI-247	JAN (9) 2019	pre-COVID-19	BAL	Negative for A B RSV	NA	NA	NA	NA	NA	Not tested	Not tested	NA	NA	3,4
W145	LTRI-248	JAN (9) 2019	pre-COVID-19	NASOP	Negative for A B RSV	NA	NA	NA	NA	NA	Not tested	Not tested	NA	NA	3,4
W146	LTRI-249	JAN (9) 2019	pre-COVID-19	NASOP	Negative for A B RSV	NA	NA	NA	NA	NA	Not tested	Not tested	NA	NA	3,4
W147	LTRI-250	JAN (9) 2019	pre-COVID-19	NASOP	Negative for A B RSV	NA	NA	NA	NA	NA	Not tested	Not tested	NA	NA	3,4
W148	LTRI-251	JAN (9) 2019	pre-COVID-19	NASOP	Negative for A B RSV	NA	NA	NA	NA	NA	Not tested	Not tested	NA	NA	3,4
W149	LTRI-252	JAN (9) 2019	pre-COVID-19	NASOP	Negative for A B RSV	NA	NA	NA	NA	NA	Not tested	Not tested	NA	NA	3,4
W150	LTRI-253	JAN (9) 2019	pre-COVID-19	NASOP	Negative for A B RSV	NA	NA	NA	NA	NA	Not tested	Not tested	NA	NA	3,4
W151	LTRI-254	JAN (9) 2019	pre-COVID-19	NASOP	Negative for A B RSV	NA	NA	NA	NA	NA	Not tested	Not tested	NA	NA	3,4
W152	LTRI-255	JAN (9) 2019	pre-COVID-19	BAL	Negative for A B RSV	NA	NA	NA	NA	NA	Not tested	Not tested	NA	NA	3,4
W153	LTRI-256	JAN (9) 2019	pre-COVID-19	NASOP	Negative for A B RSV	NA	NA	NA	NA	NA	Not tested	Not tested	NA	NA	3,4
W154	LTRI-257	JAN (9) 2019	pre-COVID-19	NASOP	Negative for A B RSV	NA	NA	NA	NA	NA	Not tested	Not tested	NA	NA	3,4
W155	LTRI-258	JAN (9) 2019	pre-COVID-19	NASOP	Negative for A B RSV	NA	NA	NA	NA	NA	Not tested	Not tested	NA	NA	3,4
W156	LTRI-259	JAN (9) 2019	pre-COVID-19	NASOP	Negative for A B RSV	NA	NA	NA	NA	NA	Not tested	Not tested	NA	NA	3,4
W157	LTRI-260	JAN (9) 2019	pre-COVID-19	NASOP	Negative for A B RSV	NA	NA	NA	NA	NA	Not tested	Not tested	NA	NA	3,4
W158	LTRI-261	JAN (9) 2019	pre-COVID-19	NASOP	Negative for A B RSV	NA	NA	NA	NA	NA	Not tested	Not tested	NA	NA	3,4
W159	LTRI-262	JAN (9) 2019	pre-COVID-19	NASOP	Negative for A B RSV	NA	NA	NA	NA	NA	Not tested	Not tested	NA	NA	3,4
W160	LTRI-263	JAN (9) 2019	pre-COVID-19	BAL	Negative for A B RSV	NA	NA	NA	NA	NA	Not tested	Not tested	NA	NA	3,4
W161	LTRI-264	JAN (9) 2019	pre-COVID-19	BAL	Negative for A B RSV	NA	NA	NA	NA	NA	Not tested	Not tested	NA	NA	3,4
W162	LTRI-265	JAN (9) 2019	pre-COVID-19	NASOP	Negative for A B RSV	NA	NA	NA	NA	NA	Not tested	Not tested	NA	NA	3,4
W163	LTRI-266	JAN (9) 2019	pre-COVID-19	NNP	Negative for A B RSV	NA	NA	NA	NA	NA	Not tested	Not tested	NA	NA	3,4
W164	LTRI-267	JAN (9) 2019	pre-COVID-19	NASOP	Negative for A B RSV	NA	NA	NA	NA	NA	Not tested	Not tested	NA	NA	3,4
W165	LTRI-268	JAN (9) 2019	pre-COVID-19	NASOP	Negative for A B RSV	NA	NA	NA	NA	NA	Not tested	Not tested	NA	NA	3,4
W166	LTRI-269	JAN (9) 2019	pre-COVID-19	BAL	Negative for A B RSV	NA	NA	NA	NA	NA	Not tested	Not tested	NA	NA	3,4
W167	LTRI-270	JAN (9) 2019	pre-COVID-19	NASOP	Negative for A B RSV	NA	NA	NA	NA	NA	Not tested	Not tested	NA	NA	3,4
W168	LTRI-271	JAN (9) 2019	pre-COVID-19	BAL	Negative for A B RSV	NA	NA	NA	NA	NA	Not tested	Not tested	NA	NA	3,4
W661	LTRI-272	JAN (9) 2019	pre-COVID-19	BAL	Negative for A B RSV	NA	NA	NA	NA	NA	Not tested	Not tested	NA	NA	3,4
W578	LTRI-273	JAN (9) 2019	pre-COVID-19	BAL	Negative for A B RSV	NA	NA	NA	NA	NA	Not tested	Not tested	NA	NA	3,4
W579	LTRI-274	JAN (9) 2019	pre-COVID-19	BAL	Negative for A B RSV	NA	NA	NA	NA	NA	Not tested	Not tested	NA	NA	3,4
W580	LTRI-275	JAN (9) 2019	pre-COVID-19	NASOP	Negative for A B RSV	NA	NA	NA	NA	NA	Not tested	Not tested	NA	NA	3,4
W581	LTRI-276	JAN (9) 2019	pre-COVID-19	BAL	PJP detected by PCR	NA	NA	NA	NA	NA	Not tested	Not tested	NA	NA	3,4
W582	LTRI-277	JAN (9) 2019	pre-COVID-19	NASOP	Negative for A B RSV	NA	NA	NA	NA	NA	Not tested	Not tested	NA	NA	3,4
W583	LTRI-278	JAN (7) 2019	pre-COVID-19	NASOP	Negative for A B RSV	NA	NA	NA	NA	NA	Not tested	Not tested	NA	NA	3,4
W584	LTRI-279	JAN (7) 2019	pre-COVID-19	NASOP	Negative for A B RSV	NA	NA	NA	NA	NA	Not tested	Not tested	NA	NA	3,4
W585	LTRI-280	JAN (7) 2019	pre-COVID-19	NASOP	Negative for A B RSV	NA	NA	NA	NA	NA	Not tested	Not tested	NA	NA	3,4
W586	LTRI-281	JAN (7) 2019	pre-COVID-19	NASOP	Negative for A B RSV	NA	NA	NA	NA	NA	Not tested	Not tested	NA	NA	3,4
W587	LTRI-282	JAN (7) 2019	pre-COVID-19	NASOP	Negative for A B RSV	NA	NA	NA	NA	NA	Not tested	Not tested	NA	NA	3,4
W588	LTRI-283	JAN (7) 2019	pre-COVID-19	NASOP	Negative for A B RSV	NA	NA	NA	NA	NA	Not tested	Not tested	NA	NA	3,4
W397	LTRI-284	JAN (7) 2019	pre-COVID-19	NASOP	Negative for A B RSV	NA	NA	NA	NA	NA	Not tested	Not tested	NA	NA	3,4
W398	LTRI-285	JAN (7) 2019	pre-COVID-19	NASOP	Negative for A B RSV	NA	NA	NA	NA	NA	Not tested	Not tested	NA	NA	3,4
W399	LTRI-286	JAN (7) 2019	pre-COVID-19	NASOP	Negative for A B RSV	NA	NA	NA	NA	NA	Not tested	Not tested	NA	NA	3,4
W400	LTRI-287	JAN (7) 2019	pre-COVID-19	NASOP	Negative for A B RSV	NA	NA	NA	NA	NA	Not tested	Not tested	NA	NA	3,4
W401	LTRI-288	JAN (7) 2019	pre-COVID-19	NASOP	Negative for A B RSV	NA	NA	NA	NA	NA	Not tested	Not tested	NA	NA	3,4
W402	LTRI-289	JAN (7) 2019	pre-COVID-19	NASOP	Negative for A B RSV	NA	NA	NA	NA	NA	Not tested	Not tested	NA	NA	3,4
W403	LTRI-290	JAN (7) 2019	pre-COVID-19	NASOP	Negative for A B RSV	NA	NA	NA	NA	NA	Not tested	Not tested	NA	NA	3,4
W404	LTRI-291	JAN (7) 2019	pre-COVID-19	NASOP	Negative for A B RSV	NA	NA	NA	NA	NA	Not tested	Not tested	NA	NA	3,4
W405	LTRI-292	JAN (7) 2019	pre-COVID-19	NASOP	Negative for A B RSV	NA	NA	NA	NA	NA	Not tested	Not tested	NA	NA	3,4
W406	LTRI-293	JAN (7) 2019	pre-COVID-19	NASOP	Negative for A B RSV	NA	NA	NA	NA	NA	Not tested	Not tested	NA	NA	3,4
W407	LTRI-294	JAN (7) 2019	pre-COVID-19	NASOP	Negative for A B RSV	NA	NA	NA	NA	NA	Not tested	Not tested	NA	NA	3,4
W408	LTRI-295	JAN (7) 2019	pre-COVID-19	BAL	Negative for A B RSV	NA	NA	NA	NA	NA	Not tested	Not tested	NA	NA	3,4
W409	LTRI-296	JAN (7) 2019	pre-COVID-19	NASOP	Negative for A B RSV	NA	NA	NA	NA	NA	Not tested	Not tested	NA	NA	3,4
W410	LTRI-297	JAN (7) 2019	pre-COVID-19	NASOP	Negative for A B RSV	NA	NA	NA	NA	NA	Not tested	Not tested	NA	NA	3,4
W411	LTRI-298	JAN (7) 2019	pre-COVID-19	BAL	Negative for A B RSV	NA	NA	NA	NA	NA	Not tested	Not tested	NA	NA	3,4
W412	LTRI-299	JAN (7) 2019	pre-COVID-19	NASOP	Negative for A B RSV	NA	NA	NA	NA	NA	Not tested	Not tested	NA	NA	3,4
W413	LTRI-300	JAN (7) 2019	pre-COVID-19	NASOP	Negative for A B RSV	NA	NA	NA	NA	NA	Not tested	Not tested	NA	NA	3,4
W414	LTRI-301	JAN (7) 2019	pre-COVID-19	NASOP	Negative for A B RSV	NA	NA	NA	NA	NA	Not tested	Not tested	NA	NA	3,4
W415	LTRI-302	JAN (7) 2019	pre-COVID-19	NASOP	Negative for A B RSV	NA	NA	NA	NA	NA	Not tested	Not tested	NA	NA	3,4
W416	LTRI-303	JAN (7) 2019	pre-COVID-19	NASOP	Negative for A B RSV	NA	NA	NA	NA	NA	Not tested	Not tested	NA	NA	3,4
W417	LTRI-304	JAN (7) 2019	pre-COVID-19	BAL	Negative for A B RSV	NA	NA	NA	NA	NA	Not tested	Not tested	NA	NA	3,4
W418	LTRI-305	JAN (7) 2019	pre-COVID-19	NASOP	Negative for A B RSV	NA	NA	NA	NA	NA	Not tested	Not tested	NA	NA	3,4
W419	LTRI-306	JAN (7) 2019	pre-COVID-19	NASOP	Negative for A B RSV	NA	NA	NA	NA	NA	Not tested	Not tested	NA	NA	3,4
W420	LTRI-307	JAN (7) 2019	pre-COVID-19	NASOP	Negative for A B RSV	NA	NA	NA	NA	NA	Not tested	Not tested	NA	NA	3,4
W421	LTRI-308	JAN (7) 2019	pre-COVID-19	NASOP	Negative for A B RSV	NA	NA	NA	NA	NA	Not tested	Not tested	NA	NA	3,4
W422	LTRI-309	JAN (7) 2019	pre-COVID-19	NASOP	Negative for A B RSV	NA	NA	NA	NA	NA	Not tested	Not tested	NA	NA	3,4
W423	LTRI-310	JAN (7) 2019	pre-COVID-19	NASOP	Negative for A B RSV	NA	NA	NA	NA	NA	Not tested	Not tested	NA	NA	3,4
W424	LTRI-311	JAN (7) 2019	pre-COVID-19	NASOP	Negative for A B RSV	NA	NA	NA	NA	NA	Not tested	Not tested	NA	NA	3,4
W425	LTRI-312	JAN (7) 2019	pre-COVID-19	NASOP	Negative for A B RSV	NA	NA	NA	NA	NA	Not tested	Not tested	NA	NA	3,4
W426	LTRI-313	JAN (7) 2019	pre-COVID-19	NASOP	Negative for A B RSV	NA	NA	NA	NA	NA	Not tested	Not tested	NA	NA	3,4
W427	LTRI-314	JAN (7) 2019	pre-COVID-19	BAL	Negative for A B RSV	NA	NA	NA	NA	NA	Not tested	Not tested	NA	NA	3,4
W428	LTRI-315	JAN (7) 2019	pre-COVID-19	NASOP	Negative for A B RSV	NA	NA	NA	NA	NA	Not tested	Not tested	NA	NA	3,4
W429	LTRI-316	JAN (7) 2019	pre-COVID-19	NASOP	Negative for A B RSV	NA	NA	NA	NA	NA	Not tested	Not tested	NA	NA	3,4
W430	LTRI-317	JAN (7) 2019	pre-COVID-19	NASOP	Negative for A B RSV	NA	NA	NA	NA	NA	Not tested	Not tested	NA	NA	3,4
W431	LTRI-318	JAN (7) 2019	pre-COVID-19	NASOP	Negative for A B RSV	NA	NA	NA	NA	NA	Not tested	Not tested	NA	NA	3,4
W432	LTRI-319	JAN (7) 2019	pre-COVID-19	NASOP	Negative for A B RSV	NA	NA	NA	NA	NA	Not tested	Not tested	NA	NA	3,4
W433	LTRI-320	JAN (7) 2019	pre-COVID-19	NASOP	Negative for A B RSV	NA	NA	NA	NA	NA	Not tested	Not tested	NA	NA	3,4
W434	LTRI-321	JAN (7) 2019	pre-COVID-19	NASOP	Negative for A B RSV	NA	NA	NA	NA	NA	Not tested	Not tested	NA	NA	3,4
W435	LTRI-322	JAN (7) 2019	pre-COVID-19	BAL	Negative for A B RSV	NA	NA	NA	NA	NA	Not tested	Not tested	NA	NA	3,4
W436	LTRI-323	JAN (7) 2019	pre-COVID-19	NASOP	Negative for A B RSV	NA	NA	NA	NA	NA	Not tested	Not tested	NA	NA	3,4
W437	LTRI-324	JAN (7) 2019	pre-COVID-19	NASOP	Negative for A B RSV	NA	NA	NA	NA	NA	Not tested	Not tested	NA	NA	3,4
W438	LTRI-325	JAN (7) 2019	pre-COVID-19	BAL	Negative for A B RSV	NA	NA	NA	NA	NA	Not tested	Not tested	NA	NA	3,4
W439	LTRI-326	JAN (7) 2019	pre-COVID-19	NASOP	Negative for A B RSV	NA	NA	NA	NA	NA	Not tested	Not tested	NA	NA	3,4
W440	LTRI-327	JAN (7) 2019	pre-COVID-19	NASOP	Negative for A B RSV	NA	NA	NA	NA	NA	Not tested	Not tested	NA	NA	3,4
W441	LTRI-328	JAN (7) 2019	pre-COVID-19	BAL	Negative for A B RSV	NA	NA	NA	NA	NA	Not tested	Not tested	NA	NA	3,4
W442	LTRI-329	JAN (7) 2019	pre-COVID-19	BAL	Negative for A B RSV	NA	NA	NA	NA	NA	Not tested	Not tested	NA	NA	3,4
W443	LTRI-330	JAN (7) 2019	pre-COVID-19	NASOP	Negative for A B RSV	NA	NA	NA	NA	NA	Not tested	Not tested	NA	NA	3,4
W444	LTRI-331	JAN (7) 2019	pre-COVID-19	NASOP	Negative for A B RSV	NA	NA	NA	NA	NA	Not tested	Not tested	NA	NA	3,4
W445	LTRI-332	JAN (7) 2019	pre-COVID-19	NASOP	Negative for A B RSV	NA	NA	NA	NA	NA	Not tested	Not tested	NA	NA	3,4
W446	LTRI-333	JAN (7) 2019	pre-COVID-19	NASOP	Negative for A B RSV	NA	NA	NA	NA	NA	Not tested	Not tested	NA	NA	3,4
W447	LTRI-334	JAN (7) 2019	pre-COVID-19	NASOP	Negative for A B RSV	NA	NA	NA	NA	NA	Not tested	Not tested	NA	NA	3,4
W448	LTRI-335	JAN (7) 2019	pre-COVID-19	NASOP	Negative for A B RSV	NA	NA	NA	NA	NA	Not tested	Not tested	NA	NA	3,4
W449	LTRI-336	JAN (7) 2019	pre-COVID-19	NASOP	Negative for A B RSV	NA	NA	NA	NA	NA	Not tested	Not tested	NA	NA	3,4
W450	LTRI-337	JAN (7) 2019	pre-COVID-19	NASOP	Negative for A B RSV	NA	NA	NA	NA	NA	Not tested	Not tested	NA	NA	3,4
W451	LTRI-338	JAN (7) 2019	pre-COVID-19	NASOP	Negative for A B RSV	NA	NA	NA	NA	NA	Not tested	Not tested	NA	NA	3,4
W452	LTRI-339	JAN (7) 2019	pre-COVID-19	NASOP	Negative for A B RSV	NA	NA	NA	NA	NA	Not tested	Not tested	NA	NA	3,4
W453	LTRI-340	JAN (7) 2019	pre-COVID-19	NASOP	Negative for A B RSV	NA	NA	NA	NA	NA	Not tested	Not tested	NA	NA	3,4
W454	LTRI-341	JAN (7) 2019	pre-COVID-19	NASOP	Negative for A B RSV	NA	NA	NA	NA	NA	Not tested	Not tested	NA	NA	3,4
W455	LTRI-342	JAN (7) 2019	pre-COVID-19	NASOP	Negative for A B RSV	NA	NA	NA	NA	NA	Not tested	Not tested	NA	NA	3,4
W456	LTRI-343	JAN (7) 2019	pre-COVID-19	BAL	Negative for A B RSV	NA	NA	NA	NA	NA	Not tested	Not tested	NA	NA	3,4
W673	LTRI-344	JAN (7) 2019	pre-COVID-19	NASOP	Negative for A B RSV	NA	NA	NA	NA	NA	Not tested	Not tested	NA	NA	3,4
W674	LTRI-345	JAN (7) 2019	pre-COVID-19	NASOP	Negative for A B RSV	NA	NA	NA	NA	NA	Not tested	Not tested	NA	NA	3,4
W675	LTRI-346	JAN (7) 2019	pre-COVID-19	NASOP	Negative for A B RSV	NA	NA	NA	NA	NA	Not tested	Not tested	NA	NA	3,4
W676	LTRI-347	JAN (7) 2019	pre-COVID-19	NASOP	Negative for A B RSV	NA	NA	NA	NA	NA	Not tested	Not tested	NA	NA	3,4
W677	LTRI-348	JAN (7) 2019	pre-COVID-19	NASOP	Negative for A B RSV	NA	NA	NA	NA	NA	Not tested	Not tested	NA	NA	3,4
W678	LTRI-349	JAN (7) 2019	pre-COVID-19	NASOP	Negative for A B RSV	NA	NA	NA	NA	NA	Not tested	Not tested	NA	NA	3,4
W590	LTRI-350	JAN (7) 2019	pre-COVID-19	NASOP	Negative for A B RSV	NA	NA	NA	NA	NA	Not tested	Not tested	NA	NA	3,4
W680	LTRI-351	JAN (7) 2019	pre-COVID-19	NASOP	Negative for A B RSV	NA	NA	NA	NA	NA	Not tested	Not tested	NA	NA	3,4
W681	LTRI-352	JAN (7) 2019	pre-COVID-19	NASOP	Negative for A B RSV	NA	NA	NA	NA	NA	Not tested	Not tested	NA	NA	3,4
W591	LTRI-353	JAN (7) 2019	pre-COVID-19	BAL	Negative for A B RSV	NA	NA	NA	NA	NA	Not tested	Not tested	NA	NA	3,4
W592	LTRI-354	JAN (7) 2019	pre-COVID-19	NASOP	Negative for A B RSV	NA	NA	NA	NA	NA	Not tested	Not tested	NA	NA	3,4
W593	LTRI-355	JAN (7) 2019	pre-COVID-19	NASOP	Negative for A B RSV	NA	NA	NA	NA	NA	Not tested	Not tested	NA	NA	3,4
W685	LTRI-356	JAN (7) 2019	pre-COVID-19	NASOP	Negative for A B RSV	NA	NA	NA	NA	NA	Not tested	Not tested	NA	NA	3,4
W686	LTRI-357	JAN (7) 2019	pre-COVID-19	NASOP	Negative for A B RSV	NA	NA	NA	NA	NA	Not tested	Not tested	NA	NA	3,4
W687	LTRI-358	JAN (7) 2019	pre-COVID-19	NASOP	Negative for A B RSV	NA	NA	NA	NA	NA	Not tested	Not tested	NA	NA	3,4
W688	LTRI-359	JAN (7) 2019	pre-COVID-19	BAL	Negative for A B RSV	NA	NA	NA	NA	NA	Not tested	Not tested	NA	NA	3,4
W689	LTRI-360	JAN (7) 2019	pre-COVID-19	NASOP	Negative for A B RSV	NA	NA	NA	NA	NA	Not tested	Not tested	NA	NA	3,4
W690	LTRI-361	JAN (7) 2019	pre-COVID-19	NASOP	Negative for A B RSV	NA	NA	NA	NA	NA	Not tested	Not tested	NA	NA	3,4
W691	LTRI-362	JAN (7) 2019	pre-COVID-19	NASOP	Negative for A B RSV	NA	NA	NA	NA	NA	Not tested	Not tested	NA	NA	3,4
W692	LTRI-363	JAN (7) 2019	pre-COVID-19	NASOP	Negative for A B RSV	NA	NA	NA	NA	NA	Not tested	Not tested	NA	NA	3,4
W693	LTRI-364	JAN (7) 2019	pre-COVID-19	NASOP	Negative for A B RSV	NA	NA	NA	NA	NA	Not tested	Not tested	NA	NA	3,4
W694	LTRI-365	JAN (7) 2019	pre-COVID-19	NASOP	Negative for A B RSV	NA	NA	NA	NA	NA	Not tested	Not tested	NA	NA	3,4
W695	LTRI-366	JAN (7) 2019	pre-COVID-19	NASOP	Negative for A B RSV	NA	NA	NA	NA	NA	Not tested	Not tested	NA	NA	3,4
W696	LTRI-367	JAN (7) 2019	pre-COVID-19	NASOP	Negative for A B RSV	NA	NA	NA	NA	NA	Not tested	Not tested	NA	NA	3,4
W697	LTRI-368	JAN (7) 2019	pre-COVID-19	NASOP	Negative for A B RSV	NA	NA	NA	NA	NA	Not tested	Not tested	NA	NA	3,4
W698	LTRI-369	JAN (7) 2019	pre-COVID-19	NASOP	Negative for A B RSV	NA	NA	NA	NA	NA	Not tested	Not tested	NA	NA	3,4
W699	LTRI-370	JAN (7) 2019	pre-COVID-19	NASOP	Negative for A B RSV	NA	NA	NA	NA	NA	Not tested	Not tested	NA	NA	3,4
W700	LTRI-371	JAN (7) 2019	pre-COVID-19	NASOP	Negative for A B RSV	NA	NA	NA	NA	NA	Not tested	Not tested	NA	NA	3,4
W701	LTRI-372	JAN (7) 2019	pre-COVID-19	NASOP	Negative for A B RSV	NA	NA	NA	NA	NA	Not tested	Not tested	NA	NA	3,4
W702	LTRI-373	JAN (7) 2019	pre-COVID-19	NASOP	Negative for A B RSV	NA	NA	NA	NA	NA	Not tested	Not tested	NA	NA	3,4
W703	LTRI-374	JAN (7) 2019	pre-COVID-19	NASOP	Negative for A B RSV	NA	NA	NA	NA	NA	Not tested	Not tested	NA	NA	3,4
W704	LTRI-375	JAN (7) 2019	pre-COVID-19	NASOP	Negative for A B RSV	NA	NA	NA	NA	NA	Not tested	Not tested	NA	NA	3,4
W705	LTRI-376	JAN (7) 2019	pre-COVID-19	NASOP	Negative for A B RSV	NA	NA	NA	NA	NA	Not tested	Not tested	NA	NA	3,4
W706	LTRI-377	JAN (7) 2019	pre-COVID-19	NASOP	Negative for A B RSV	NA	NA	NA	NA	NA	Not tested	Not tested	NA	NA	3,4
W707	LTRI-378	JAN (7) 2019	pre-COVID-19	NASOP	Negative for A B RSV	NA	NA	NA	NA	NA	Not tested	Not tested	NA	NA	3,4
W708	LTRI-379	JAN (7) 2019	pre-COVID-19	NASOP	Negative for A B RSV	NA	NA	NA	NA	NA	Not tested	Not tested	NA	NA	3,4
W709	LTRI-380	JAN (7) 2019	pre-COVID-19	NASOP	Negative for A B RSV	NA	NA	NA	NA	NA	Not tested	Not tested	NA	NA	3,4
W710	LTRI-381	JAN (7) 2019	pre-COVID-19	NASOP	Negative for A B RSV	NA	NA	NA	NA	NA	Not tested	Not tested	NA	NA	3,4
W711	LTRI-382	JAN (7) 2019	pre-COVID-19	NASOP	Negative for A B RSV	NA	NA	NA	NA	NA	Not tested	Not tested	NA	NA	3,4
W712	LTRI-383	JAN (7) 2019	pre-COVID-19	NASOP	Negative for A B RSV	NA	NA	NA	NA	NA	Not tested	Not tested	NA	NA	3,4
W713	LTRI-384	JAN (7) 2019	pre-COVID-19	NASOP	Negative for A B RSV	NA	NA	NA	NA	NA	Not tested	Not tested	NA	NA	3,4
W714	LTRI-385	JAN (7) 2019	pre-COVID-19	NASOP	Negative for A B RSV	NA	NA	NA	NA	NA	Not tested	Not tested	NA	NA	3,4
W715	LTRI-386	JAN (7) 2019	pre-COVID-19	NASOP	Negative for A B RSV	NA	NA	NA	NA	NA	Not tested	Not tested	NA	NA	3,4
W716	LTRI-387	JAN (7) 2019	pre-COVID-19	NASOP	Negative for A B RSV	NA	NA	NA	NA	NA	Not tested	Not tested	NA	NA	3,4
W717	LTRI-388	JAN (7) 2019	pre-COVID-19	NASOP	Negative for A B RSV	NA	NA	NA	NA	NA	Not tested	Not tested	NA	NA	3,4
W718	LTRI-389	JAN (7) 2019	pre-COVID-19	NASOP	Negative for A B RSV	NA	NA	NA	NA	NA	Not tested	Not tested	NA	NA	3,4
W719	LTRI-390	JAN (7) 2019	pre-COVID-19	NASOP	Negative for A B RSV	NA	NA	NA	NA	NA	Not tested	Not tested	NA	NA	3,4
W720	LTRI-391	JAN (7) 2019	pre-COVID-19	NASOP	Negative for A B RSV	NA	NA	NA	NA	NA	Not tested	Not tested	NA	NA	3,4
W721	LTRI-392	NOV (29) 2019	pre-COVID-19	NASOP	Negative for A B RSV	NA	NA	NA	NA	NA	Not tested	Not tested	NA	NA	3,4
W722	LTRI-393	NOV (29) 2019	pre-COVID-19	BAL	Negative for A B RSV	NA	NA	NA	NA	NA	Not tested	Not tested	NA	NA	3,4
W723	LTRI-394	NOV (29) 2019	pre-COVID-19	BAL	Negative for A B RSV	NA	NA	NA	NA	NA	Not tested	Not tested	NA	NA	3,4
W724	LTRI-395	NOV (29) 2019	pre-COVID-19	BAL	Negative for A B RSV	NA	NA	NA	NA	NA	Not tested	Not tested	NA	NA	3,4
W725	LTRI-396	NOV (29) 2019	pre-COVID-19	BAL	Negative for A B RSV	NA	NA	NA	NA	NA	Not tested	Not tested	NA	NA	3,4
W726	LTRI-397	NOV (29) 2019	pre-COVID-19	BAL	Negative for A B RSV	NA	NA	NA	NA	NA	Not tested	Not tested	NA	NA	3,4
W727	LTRI-398	NOV (29) 2019	pre-COVID-19	BAL	Negative for A B RSV	NA	NA	NA	NA	NA	Not tested	Not tested	NA	NA	3,4
W728	LTRI-399	NOV (29) 2019	pre-COVID-19	BAL	Negative for A B RSV	NA	NA	NA	NA	NA	Not tested	Not tested	NA	NA	3,4
W729	LTRI-400	NOV (29) 2019	pre-COVID-19	BAL	Negative for A B RSV	NA	NA	NA	NA	NA	Not tested	Not tested	NA	NA	3,4
W730	LTRI-401	NOV (29) 2019	pre-COVID-19	BAL	Negative for A B RSV	NA	NA	NA	NA	NA	Not tested	Not tested	NA	NA	3,4
W731	LTRI-402	NOV (29) 2019	pre-COVID-19	BAL	Negative for A B RSV	NA	NA	NA	NA	NA	Not tested	Not tested	NA	NA	3,4
W732	LTRI-403	NOV (29) 2019	pre-COVID-19	BAL	Influenza B virus	NA	NA	NA	NA	NA	Not tested	Not tested	NA	NA	3,4
W733	LTRI-404	NOV (29) 2019	pre-COVID-19	BAL	Negative for A B RSV	NA	NA	NA	NA	NA	Not tested	Not tested	NA	NA	3,4
W734	LTRI-405	NOV (29) 2019	pre-COVID-19	BAL	Negative for A B RSV	NA	NA	NA	NA	NA	Not tested	Not tested	NA	NA	3,4
W735	LTRI-406	NOV (29) 2019	pre-COVID-19	BAL	Negative for A B RSV	NA	NA	NA	NA	NA	Not tested	Not tested	NA	NA	3,4
W736	LTRI-407	NOV (29) 2019	pre-COVID-19	BAL	Negative for A B RSV	NA	NA	NA	NA	NA	Not tested	Not tested	NA	NA	3,4
W737	LTRI-408	NOV (29) 2019	pre-COVID-19	NASOP	Negative for A B RSV	NA	NA	NA	NA	NA	Not tested	Not tested	NA	NA	3,4
W738	LTRI-409	NOV (29) 2019	pre-COVID-19	BAL	Negative for A B RSV	NA	NA	NA	NA	NA	Not tested	Not tested	NA	NA	3,4
W739	LTRI-410	NOV (29) 2019	pre-COVID-19	BAL	Negative for A B RSV	NA	NA	NA	NA	NA	Not tested	Not tested	NA	NA	3,4
W740	LTRI-411	NOV (29) 2019	pre-COVID-19	BAL	Negative for A B RSV	NA	NA	NA	NA	NA	Not tested	Not tested	NA	NA	3,4
W741	LTRI-412	NOV (29) 2019	pre-COVID-19	BAL	Negative for A B RSV	NA	NA	NA	NA	NA	Not tested	Not tested	NA	NA	3,4
W742	LTRI-413	NOV (29) 2019	pre-COVID-19	NASOP	Respiratory syncytial virus	NA	NA	NA	NA	NA	Not tested	Not tested	NA	NA	3,4
W743	LTRI-414	NOV (29) 2019	pre-COVID-19	BAL	Negative for A B RSV	NA	NA	NA	NA	NA	Not tested	Not tested	NA	NA	3,4
W744	LTRI-415	NOV (29) 2019	pre-COVID-19	BAL	Negative for A B RSV	NA	NA	NA	NA	NA	Not tested	Not tested	NA	NA	3,4
W602	LTRI-416	NOV (29) 2019	pre-COVID-19	BAL	Negative for A B RSV	NA	NA	NA	NA	NA	Not tested	Not tested	NA	NA	3,4
W626	LTRI-417	NOV (29) 2019	pre-COVID-19	NASOP	Negative for A B RSV	NA	NA	NA	NA	NA	Not tested	Not tested	NA	NA	3,4
W627	LTRI-418	NOV (29) 2019	pre-COVID-19	NASOP	Respiratory syncytial virus	NA	NA	NA	NA	NA	Not tested	Not tested	NA	NA	3,4
W628	LTRI-419	NOV (29) 2019	pre-COVID-19	BAL	Negative for A B RSV	NA	NA	NA	NA	NA	Not tested	Not tested	NA	NA	3,4
W629	LTRI-420	NOV (29) 2019	pre-COVID-19	BAL	Negative for A B RSV	NA	NA	NA	NA	NA	Not tested	Not tested	NA	NA	3,4
W630	LTRI-421	NOV (29) 2019	pre-COVID-19	BAL	Negative for A B RSV	NA	NA	NA	NA	NA	Not tested	Not tested	NA	NA	3,4
W631	LTRI-422	NOV (29) 2019	pre-COVID-19	BAL	Negative for A B RSV	NA	NA	NA	NA	NA	Not tested	Not tested	NA	NA	3,4
W632	LTRI-423	NOV (29) 2019	pre-COVID-19	BALCF	Negative for A B RSV	NA	NA	NA	NA	NA	Not tested	Not tested	NA	NA	3,4
W633	LTRI-424	NOV (29) 2019	pre-COVID-19	BAL	Negative for A B RSV	NA	NA	NA	NA	NA	Not tested	Not tested	NA	NA	3,4
W634	LTRI-425	NOV (29) 2019	pre-COVID-19	NASOP	Negative for A B RSV	NA	NA	NA	NA	NA	Not tested	Not tested	NA	NA	3,4
W635	LTRI-426	NOV (29) 2019	pre-COVID-19	BAL	Negative for A B RSV	NA	NA	NA	NA	NA	Not tested	Not tested	NA	NA	3,4
W636	LTRI-427	NOV (29) 2019	pre-COVID-19	BAL	Negative for A B RSV	NA	NA	NA	NA	NA	Not tested	Not tested	NA	NA	3,4
W603	LTRI-428	NOV (29) 2019	pre-COVID-19	BAL	Negative for A B RSV	NA	NA	NA	NA	NA	Not tested	Not tested	NA	NA	3,4
W638	LTRI-429	NOV (29) 2019	pre-COVID-19	BAL	Negative for A B RSV	NA	NA	NA	NA	NA	Not tested	Not tested	NA	NA	3,4
W639	LTRI-430	NOV (29) 2019	pre-COVID-19	BAL	Negative for A B RSV	NA	NA	NA	NA	NA	Not tested	Not tested	NA	NA	3,4
W640	LTRI-431	NOV (29) 2019	pre-COVID-19	NASOP	Negative for A B RSV	NA	NA	NA	NA	NA	Not tested	Not tested	NA	NA	3,4
W641	LTRI-432	NOV (29) 2019	pre-COVID-19	BAL	Negative for A B RSV	NA	NA	NA	NA	NA	Not tested	Not tested	NA	NA	3,4
W642	LTRI-433	NOV (29) 2019	pre-COVID-19	NASOP	Respiratory syncytial virus	NA	NA	NA	NA	NA	Not tested	Not tested	NA	NA	3,4
W643	LTRI-434	NOV (29) 2019	pre-COVID-19	NASOP	Negative for A B RSV	NA	NA	NA	NA	NA	Not tested	Not tested	NA	NA	3,4
W644	LTRI-435	NOV (29) 2019	pre-COVID-19	NASOP	Negative for A B RSV	NA	NA	NA	NA	NA	Not tested	Not tested	NA	NA	3,4
W645	LTRI-436	NOV (29) 2019	pre-COVID-19	BAL	Negative for A B RSV	NA	NA	NA	NA	NA	Not tested	Not tested	NA	NA	3,4
W646	LTRI-437	NOV (29) 2019	pre-COVID-19	BAL	Negative for A B RSV	NA	NA	NA	NA	NA	Not tested	Not tested	NA	NA	3,4
W647	LTRI-438	NOV (29) 2019	pre-COVID-19	BMSH	Negative for A B RSV	NA	NA	NA	NA	NA	Not tested	Not tested	NA	NA	3,4
W648	LTRI-439	NOV (29) 2019	pre-COVID-19	BAL	Negative for A B RSV	NA	NA	NA	NA	NA	Not tested	Not tested	NA	NA	3,4
W604	LTRI-440	NOV (29) 2019	pre-COVID-19	BAL	Negative for A B RSV	NA	NA	NA	NA	NA	Not tested	Not tested	NA	NA	3,4
W026	LTRI-441	NOV (29) 2019	pre-COVID-19	BAL	Negative for A B RSV	NA	NA	NA	NA	NA	Not tested	Not tested	NA	NA	3,4
W027	LTRI-442	NOV (29) 2019	pre-COVID-19	BAL	Negative for A B RSV	NA	NA	NA	NA	NA	Not tested	Not tested	NA	NA	3,4
W028	LTRI-443	NOV (29) 2019	pre-COVID-19	BAL	Negative for A B RSV	NA	NA	NA	NA	NA	Not tested	Not tested	NA	NA	3,4
W029	LTRI-444	NOV (29) 2019	pre-COVID-19	BAL	Negative for A B RSV	NA	NA	NA	NA	NA	Not tested	Not tested	NA	NA	3,4
W030	LTRI-445	NOV (29) 2019	pre-COVID-19	BAL	Negative for A B RSV	NA	NA	NA	NA	NA	Not tested	Not tested	NA	NA	3,4
W031	LTRI-446	NOV (29) 2019	pre-COVID-19	BAL	Negative for A B RSV	NA	NA	NA	NA	NA	Not tested	Not tested	NA	NA	3,4
W032	LTRI-447	NOV (29) 2019	pre-COVID-19	NASOP	Negative for A B RSV	NA	NA	NA	NA	NA	Not tested	Not tested	NA	NA	3,4
W033	LTRI-448	NOV (29) 2019	pre-COVID-19	BAL	Negative for A B RSV	NA	NA	NA	NA	NA	Not tested	Not tested	NA	NA	3,4
W034	LTRI-449	NOV (29) 2019	pre-COVID-19	NASOP	Negative for A B RSV	NA	NA	NA	NA	NA	Not tested	Not tested	NA	NA	3,4
W035	LTRI-450	NOV (29) 2019	pre-COVID-19	BAL	Negative for A B RSV	NA	NA	NA	NA	NA	Not tested	Not tested	NA	NA	3,4
W036	LTRI-451	NOV (29) 2019	pre-COVID-19	NASOP	Negative for A B RSV	NA	NA	NA	NA	NA	Not tested	Not tested	NA	NA	3,4
W605	LTRI-452	NOV (29) 2019	pre-COVID-19	BAL	Negative for A B RSV	NA	NA	NA	NA	NA	Not tested	Not tested	NA	NA	3,4
W038	LTRI-453	NOV (29) 2019	pre-COVID-19	BAL	Negative for A B RSV	NA	NA	NA	NA	NA	Not tested	Not tested	NA	NA	3,4
W039	LTRI-454	NOV (29) 2019	pre-COVID-19	BAL	Negative for A B RSV	NA	NA	NA	NA	NA	Not tested	Not tested	NA	NA	3,4
W040	LTRI-455	NOV (29) 2019	pre-COVID-19	BAL	Negative for A B RSV	NA	NA	NA	NA	NA	Not tested	Not tested	NA	NA	3,4
W041	LTRI-456	NOV (29) 2019	pre-COVID-19	NASOP	Negative for A B RSV	NA	NA	NA	NA	NA	Not tested	Not tested	NA	NA	3,4
W042	LTRI-457	NOV (29) 2019	pre-COVID-19	BAL	Negative for A B RSV	NA	NA	NA	NA	NA	Not tested	Not tested	NA	NA	3,4
W043	LTRI-458	NOV (29) 2019	pre-COVID-19	BAL	Negative for A B RSV	NA	NA	NA	NA	NA	Not tested	Not tested	NA	NA	3,4
W044	LTRI-459	NOV (29) 2019	pre-COVID-19	BAL	Negative for A B RSV	NA	NA	NA	NA	NA	Not tested	Not tested	NA	NA	3,4
W045	LTRI-460	NOV (29) 2019	pre-COVID-19	BAL	Negative for A B RSV	NA	NA	NA	NA	NA	Not tested	Not tested	NA	NA	3,4
W046	LTRI-461	NOV (29) 2019	pre-COVID-19	BAL	Negative for A B RSV	NA	NA	NA	NA	NA	Not tested	Not tested	NA	NA	3,4
W047	LTRI-462	NOV (29) 2019	pre-COVID-19	BAL	Negative for A B RSV	NA	NA	NA	NA	NA	Not tested	Not tested	NA	NA	3,4
W048	LTRI-463	NOV (29) 2019	pre-COVID-19	BAL	Negative for A B RSV	NA	NA	NA	NA	NA	Not tested	Not tested	NA	NA	3,4
W606	LTRI-464	NOV (29) 2019	pre-COVID-19	BAL	Negative for A B RSV	NA	NA	NA	NA	NA	Not tested	Not tested	NA	NA	3,4
W050	LTRI-465	DEC (6) 2019	pre-COVID-19	BAL	Negative for A B RSV	NA	NA	NA	NA	NA	Not tested	Not tested	NA	NA	3,4
W051	LTRI-466	DEC (6) 2019	pre-COVID-19	BAL	Negative for A B RSV	NA	NA	NA	NA	NA	Not tested	Not tested	NA	NA	3,4
W052	LTRI-467	DEC (6) 2019	pre-COVID-19	BAL	Negative for A B RSV	NA	NA	NA	NA	NA	Not tested	Not tested	NA	NA	3,4
W053	LTRI-468	DEC (6) 2019	pre-COVID-19	NASOP	Negative for A B RSV	NA	NA	NA	NA	NA	Not tested	Not tested	NA	NA	3,4
W054	LTRI-469	DEC (6) 2019	pre-COVID-19	NASOP	Negative for A B RSV	NA	NA	NA	NA	NA	Not tested	Not tested	NA	NA	3,4
W055	LTRI-470	DEC (6) 2019	pre-COVID-19	NASOP	Negative for A B RSV	NA	NA	NA	NA	NA	Not tested	Not tested	NA	NA	3,4
W056	LTRI-471	DEC (6) 2019	pre-COVID-19	NASOP	Negative for A B RSV	NA	NA	NA	NA	NA	Not tested	Not tested	NA	NA	3,4
W057	LTRI-472	DEC (6) 2019	pre-COVID-19	NASOP	Negative for A B RSV	NA	NA	NA	NA	NA	Not tested	Not tested	NA	NA	3,4
W058	LTRI-473	DEC (6) 2019	pre-COVID-19	NASOP	Negative for A B RSV	NA	NA	NA	NA	NA	Not tested	Not tested	NA	NA	3,4
W059	LTRI-474	DEC (6) 2019	pre-COVID-19	NASOP	Negative for A B RSV	NA	NA	NA	NA	NA	Not tested	Not tested	NA	NA	3,4
W060	LTRI-475	DEC (6) 2019	pre-COVID-19	NASOP	Negative for A B RSV	NA	NA	NA	NA	NA	Not tested	Not tested	NA	NA	3,4
W607	LTRI-476	DEC (6) 2019	pre-COVID-19	NNP	Negative for A B RSV	NA	NA	NA	NA	NA	Not tested	Not tested	NA	NA	3,4
W062	LTRI-477	DEC (6) 2019	pre-COVID-19	NASOP	Negative for A B RSV	NA	NA	NA	NA	NA	Not tested	Not tested	NA	NA	3,4
W063	LTRI-478	DEC (6) 2019	pre-COVID-19	BAL	Negative for A B RSV	NA	NA	NA	NA	NA	Not tested	Not tested	NA	NA	3,4
W064	LTRI-479	DEC (6) 2019	pre-COVID-19	BAL	Negative for A B RSV	NA	NA	NA	NA	NA	Not tested	Not tested	NA	NA	3,4
W065	LTRI-480	DEC (6) 2019	pre-COVID-19	BAL	Negative for A B RSV	NA	NA	NA	NA	NA	Not tested	Not tested	NA	NA	3,4
W066	LTRI-481	DEC (6) 2019	pre-COVID-19	BAL	Negative for A B RSV	NA	NA	NA	NA	NA	Not tested	Not tested	NA	NA	3,4
W067	LTRI-482	DEC (6) 2019	pre-COVID-19	NASOP	Negative for A B RSV	NA	NA	NA	NA	NA	Not tested	Not tested	NA	NA	3,4
W068	LTRI-483	DEC (6) 2019	pre-COVID-19	BAL	Negative for A B RSV	NA	NA	NA	NA	NA	Not tested	Not tested	NA	NA	3,4
W069	LTRI-484	DEC (6) 2019	pre-COVID-19	BAL	Negative for A B RSV	NA	NA	NA	NA	NA	Not tested	Not tested	NA	NA	3,4
W070	LTRI-485	DEC (6) 2019	pre-COVID-19	BAL	Negative for A B RSV	NA	NA	NA	NA	NA	Not tested	Not tested	NA	NA	3,4
W071	LTRI-486	DEC (6) 2019	pre-COVID-19	BAL	Negative for A B RSV	NA	NA	NA	NA	NA	Not tested	Not tested	NA	NA	3,4
W072	LTRI-487	DEC (6) 2019	pre-COVID-19	BAL	Respiratory syncytial virus	NA	NA	NA	NA	NA	Not tested	Not tested	NA	NA	3,4
W097	LTRI-488	DEC (6) 2019	pre-COVID-19	BAL	Negative for A B RSV	NA	NA	NA	NA	NA	Not tested	Not tested	NA	NA	4
W098	LTRI-489	DEC (6) 2019	pre-COVID-19	BAL	Negative for A B RSV	NA	NA	NA	NA	NA	Not tested	Not tested	NA	NA	4
W099	LTRI-490	DEC (6) 2019	pre-COVID-19	BAL	Negative for PJP and Galactomannan	NA	NA	NA	NA	NA	Not tested	Not tested	NA	NA	4
W100	LTRI-491	DEC (6) 2019	pre-COVID-19	BAL	Negative for PJP and Galactomannan	NA	NA	NA	NA	NA	Not tested	Not tested	NA	NA	4
W101	LTRI-492	DEC (6) 2019	pre-COVID-19	BAL	Influenza A virus	NA	NA	NA	NA	NA	Not tested	Not tested	NA	NA	4
W102	LTRI-493	DEC (6) 2019	pre-COVID-19	BAL	Negative for A B RSV	NA	NA	NA	NA	NA	Not tested	Not tested	NA	NA	4
W103	LTRI-494	DEC (6) 2019	pre-COVID-19	NASOP	Negative for A B RSV	NA	NA	NA	NA	NA	Not tested	Not tested	NA	NA	4
W104	LTRI-495	DEC (6) 2019	pre-COVID-19	BAL	Negative for A B RSV	NA	NA	NA	NA	NA	Not tested	Not tested	NA	NA	4
W105	LTRI-496	DEC (6) 2019	pre-COVID-19	NASOP	Negative for A B RSV	NA	NA	NA	NA	NA	Not tested	Not tested	NA	NA	4
W106	LTRI-497	DEC (6) 2019	pre-COVID-19	NASOP	Negative for A B RSV	NA	NA	NA	NA	NA	Not tested	Not tested	NA	NA	4
W107	LTRI-498	DEC (6) 2019	pre-COVID-19	BAL	Negative for A B RSV	NA	NA	NA	NA	NA	Not tested	Not tested	NA	NA	4
W108	LTRI-499	DEC (6) 2019	pre-COVID-19	BAL	Negative for A B RSV	NA	NA	NA	NA	NA	Not tested	Not tested	NA	NA	4
W109	LTRI-500	DEC (6) 2019	pre-COVID-19	NASOP	Negative for A B RSV	NA	NA	NA	NA	NA	Not tested	Not tested	NA	NA	4
W110	LTRI-501	DEC (6) 2019	pre-COVID-19	BAL	Negative for A B RSV	NA	NA	NA	NA	NA	Not tested	Not tested	NA	NA	4
W111	LTRI-502	DEC (6) 2019	pre-COVID-19	BAL	Negative for A B RSV	NA	NA	NA	NA	NA	Not tested	Not tested	NA	NA	4
W112	LTRI-503	DEC (6) 2019	pre-COVID-19	NASOP	Negative for A B RSV	NA	NA	NA	NA	NA	Not tested	Not tested	NA	NA	4
W113	LTRI-504	DEC (6) 2019	pre-COVID-19	BAL	Negative for A B RSV	NA	NA	NA	NA	NA	Not tested	Not tested	NA	NA	4
W114	LTRI-505	DEC (6) 2019	pre-COVID-19	NASOP	Negative for A B RSV	NA	NA	NA	NA	NA	Not tested	Not tested	NA	NA	4
W115	LTRI-506	DEC (6) 2019	pre-COVID-19	BAL	Negative for A B RSV	NA	NA	NA	NA	NA	Not tested	Not tested	NA	NA	4
W116	LTRI-507	DEC (6) 2019	pre-COVID-19	NASOP	Negative for A B RSV	NA	NA	NA	NA	NA	Not tested	Not tested	NA	NA	4
W117	LTRI-508	DEC (6) 2019	pre-COVID-19	BAL	Negative for A B RSV	NA	NA	NA	NA	NA	Not tested	Not tested	NA	NA	4
W118	LTRI-509	DEC (6) 2019	pre-COVID-19	BAL	Negative for A B RSV	NA	NA	NA	NA	NA	Not tested	Not tested	NA	NA	4
W119	LTRI-510	DEC (6) 2019	pre-COVID-19	BAL	Negative for A B RSV	NA	NA	NA	NA	NA	Not tested	Not tested	NA	NA	4
W120	LTRI-511	DEC (6) 2019	pre-COVID-19	BAL	Negative for A B RSV	NA	NA	NA	NA	NA	Not tested	Not tested	NA	NA	4
W121	LTRI-512	DEC (6) 2019	pre-COVID-19	BAL	Negative for A B RSV	NA	NA	NA	NA	NA	Not tested	Not tested	NA	NA	4
W122	LTRI-513	DEC (6) 2019	pre-COVID-19	BAL	Negative for A B RSV	NA	NA	NA	NA	NA	Not tested	Not tested	NA	NA	4
W123	LTRI-514	DEC (6) 2019	pre-COVID-19	BAL	Negative for A B RSV	NA	NA	NA	NA	NA	Not tested	Not tested	NA	NA	4
W124	LTRI-515	DEC (6) 2019	pre-COVID-19	NASOP	Negative for A B RSV	NA	NA	NA	NA	NA	Not tested	Not tested	NA	NA	4
W125	LTRI-516	DEC (6) 2019	pre-COVID-19	BAL	Negative for A B RSV	NA	NA	NA	NA	NA	Not tested	Not tested	NA	NA	4
W126	LTRI-517	DEC (6) 2019	pre-COVID-19	NASOP	Negative for A B RSV	NA	NA	NA	NA	NA	Not tested	Not tested	NA	NA	4
W127	LTRI-518	DEC (6) 2019	pre-COVID-19	BAL	Negative for A B RSV	NA	NA	NA	NA	NA	Not tested	Not tested	NA	NA	4
W128	LTRI-519	DEC (6) 2019	pre-COVID-19	BAL	Negative for A B RSV	NA	NA	NA	NA	NA	Not tested	Not tested	NA	NA	4
W129	LTRI-520	DEC (6) 2019	pre-COVID-19	BAL	Negative for A B RSV	NA	NA	NA	NA	NA	Not tested	Not tested	NA	NA	4
W130	LTRI-521	DEC (6) 2019	pre-COVID-19	BAL	Negative for A B RSV	NA	NA	NA	NA	NA	Not tested	Not tested	NA	NA	4
W131	LTRI-522	DEC (6) 2019	pre-COVID-19	BAL	Negative for A B RSV	NA	NA	NA	NA	NA	Not tested	Not tested	NA	NA	4
W132	LTRI-523	DEC (6) 2019	pre-COVID-19	BAL	Negative for A B RSV	NA	NA	NA	NA	NA	Not tested	Not tested	NA	NA	4
W133	LTRI-524	DEC (6) 2019	pre-COVID-19	BAL	Negative for A B RSV	NA	NA	NA	NA	NA	Not tested	Not tested	NA	NA	4
W134	LTRI-525	DEC (6) 2019	pre-COVID-19	BALCF	Negative for A B RSV	NA	NA	NA	NA	NA	Not tested	Not tested	NA	NA	4
W135	LTRI-526	DEC (6) 2019	pre-COVID-19	BAL	Negative for A B RSV	NA	NA	NA	NA	NA	Not tested	Not tested	NA	NA	4
W136	LTRI-527	DEC (6) 2019	pre-COVID-19	BAL	Negative for A B RSV	NA	NA	NA	NA	NA	Not tested	Not tested	NA	NA	4
W137	LTRI-528	DEC (6) 2019	pre-COVID-19	BAL	Negative for A B RSV	NA	NA	NA	NA	NA	Not tested	Not tested	NA	NA	4
W138	LTRI-529	DEC (6) 2019	pre-COVID-19	BAL	Negative for A B RSV	NA	NA	NA	NA	NA	Not tested	Not tested	NA	NA	4
W139	LTRI-530	DEC (6) 2019	pre-COVID-19	BAL	Negative for A B RSV	NA	NA	NA	NA	NA	Not tested	Not tested	NA	NA	4
W140	LTRI-531	DEC (6) 2019	pre-COVID-19	BAL	Negative for A B RSV	NA	NA	NA	NA	NA	Not tested	Not tested	NA	NA	4
W141	LTRI-532	DEC (6) 2019	pre-COVID-19	BAL	Negative for A B RSV	NA	NA	NA	NA	NA	Not tested	Not tested	NA	NA	4
W142	LTRI-533	DEC (6) 2019	pre-COVID-19	BAL	Negative for A B RSV	NA	NA	NA	NA	NA	Not tested	Not tested	NA	NA	4
W143	LTRI-534	DEC (6) 2019	pre-COVID-19	BAL	Negative for A B RSV	NA	NA	NA	NA	NA	Not tested	Not tested	NA	NA	4
W144	LTRI-535	DEC (6) 2019	pre-COVID-19	BAL	Negative for A B RSV	NA	NA	NA	NA	NA	Not tested	Not tested	NA	NA	4
W145	LTRI-536	DEC (14) 2019	pre-COVID-19	BAL	Negative for A B RSV	NA	NA	NA	NA	NA	Not tested	Not tested	NA	NA	4
W146	LTRI-537	DEC (14) 2019	pre-COVID-19	BAL	Negative for A B RSV	NA	NA	NA	NA	NA	Not tested	Not tested	NA	NA	4
W147	LTRI-538	DEC (14) 2019	pre-COVID-19	BAL	Negative for A B RSV	NA	NA	NA	NA	NA	Not tested	Not tested	NA	NA	4
W148	LTRI-539	DEC (14) 2019	pre-COVID-19	BAL	Negative for A B RSV	NA	NA	NA	NA	NA	Not tested	Not tested	NA	NA	4
W149	LTRI-540	DEC (14) 2019	pre-COVID-19	NASOP	Negative for A B RSV	NA	NA	NA	NA	NA	Not tested	Not tested	NA	NA	4
W150	LTRI-541	DEC (14) 2019	pre-COVID-19	NASOP	Negative for A B RSV	NA	NA	NA	NA	NA	Not tested	Not tested	NA	NA	4
W151	LTRI-542	DEC (14) 2019	pre-COVID-19	NASOP	Negative for A B RSV	NA	NA	NA	NA	NA	Not tested	Not tested	NA	NA	4
W152	LTRI-543	DEC (14) 2019	pre-COVID-19	BAL	Negative for A B RSV	NA	NA	NA	NA	NA	Not tested	Not tested	NA	NA	4
W153	LTRI-544	DEC (14) 2019	pre-COVID-19	BAL	Negative for A B RSV	NA	NA	NA	NA	NA	Not tested	Not tested	NA	NA	4
W154	LTRI-545	DEC (14) 2019	pre-COVID-19	BAL	Negative for A B RSV	NA	NA	NA	NA	NA	Not tested	Not tested	NA	NA	4
W155	LTRI-546	DEC (14) 2019	pre-COVID-19	BAL	Negative for A B RSV	NA	NA	NA	NA	NA	Not tested	Not tested	NA	NA	4
W156	LTRI-547	DEC (14) 2019	pre-COVID-19	BAL	Negative for A B RSV	NA	NA	NA	NA	NA	Not tested	Not tested	NA	NA	4
W157	LTRI-548	DEC (14) 2019	pre-COVID-19	BAL	Negative for A B RSV	NA	NA	NA	NA	NA	Not tested	Not tested	NA	NA	4
W158	LTRI-549	DEC (14) 2019	pre-COVID-19	BAL	Negative for A B RSV	NA	NA	NA	NA	NA	Not tested	Not tested	NA	NA	4
W159	LTRI-550	DEC (14) 2019	pre-COVID-19	BAL	Negative for A B RSV	NA	NA	NA	NA	NA	Not tested	Not tested	NA	NA	4
W160	LTRI-551	DEC (14) 2019	pre-COVID-19	BAL	Negative for A B RSV	NA	NA	NA	NA	NA	Not tested	Not tested	NA	NA	4
W161	LTRI-552	DEC (14) 2019	pre-COVID-19	BAL	Negative for A B RSV	NA	NA	NA	NA	NA	Not tested	Not tested	NA	NA	4
W162	LTRI-553	DEC (14) 2019	pre-COVID-19	NASOP	Negative for A B RSV	NA	NA	NA	NA	NA	Not tested	Not tested	NA	NA	4
W163	LTRI-554	DEC (14) 2019	pre-COVID-19	BAL	Negative for A B RSV	NA	NA	NA	NA	NA	Not tested	Not tested	NA	NA	4
W164	LTRI-555	DEC (14) 2019	pre-COVID-19	BAL	Negative for A B RSV	NA	NA	NA	NA	NA	Not tested	Not tested	NA	NA	4
W165	LTRI-556	DEC (14) 2019	pre-COVID-19	BAL	Negative for A B RSV	NA	NA	NA	NA	NA	Not tested	Not tested	NA	NA	4
W166	LTRI-557	DEC (14) 2019	pre-COVID-19	BAL	Negative for A B RSV	NA	NA	NA	NA	NA	Not tested	Not tested	NA	NA	4
W167	LTRI-558	DEC (14) 2019	pre-COVID-19	BAL	Negative for A B RSV	NA	NA	NA	NA	NA	Not tested	Not tested	NA	NA	4
W168	LTRI-559	DEC (14) 2019	pre-COVID-19	NASOP	Negative for A B RSV	NA	NA	NA	NA	NA	Not tested	Not tested	NA	NA	4
W661	LTRI-560	DEC (14) 2019	pre-COVID-19	BAL	Negative for A B RSV	NA	NA	NA	NA	NA	Not tested	Not tested	NA	NA	4
W578	LTRI-561	DEC (14) 2019	pre-COVID-19	BAL	Negative for A B RSV	NA	NA	NA	NA	NA	Not tested	Not tested	NA	NA	4
W579	LTRI-562	DEC (14) 2019	pre-COVID-19	BAL	Negative for A B RSV	NA	NA	NA	NA	NA	Not tested	Not tested	NA	NA	4
W580	LTRI-563	DEC (14) 2019	pre-COVID-19	BAL	Negative for A B RSV	NA	NA	NA	NA	NA	Not tested	Not tested	NA	NA	4
W581	LTRI-564	DEC (14) 2019	pre-COVID-19	NASOP	Negative for A B RSV	NA	NA	NA	NA	NA	Not tested	Not tested	NA	NA	4
W582	LTRI-565	DEC (14) 2019	pre-COVID-19	BAL	Negative for A B RSV	NA	NA	NA	NA	NA	Not tested	Not tested	NA	NA	4
W583	LTRI-566	DEC (14) 2019	pre-COVID-19	BAL	Negative for A B RSV	NA	NA	NA	NA	NA	Not tested	Not tested	NA	NA	4
W584	LTRI-567	DEC (14) 2019	pre-COVID-19	BAL	Negative for A B RSV	NA	NA	NA	NA	NA	Not tested	Not tested	NA	NA	4
W585	LTRI-568	DEC (14) 2019	pre-COVID-19	BAL	Negative for A B RSV	NA	NA	NA	NA	NA	Not tested	Not tested	NA	NA	4
W586	LTRI-569	DEC (14) 2019	pre-COVID-19	BAL	Negative for A B RSV	NA	NA	NA	NA	NA	Not tested	Not tested	NA	NA	4
W587	LTRI-570	DEC (14) 2019	pre-COVID-19	BAL	Negative for A B RSV	NA	NA	NA	NA	NA	Not tested	Not tested	NA	NA	4
W588	LTRI-571	DEC (14) 2019	pre-COVID-19	BAL	Negative for A B RSV	NA	NA	NA	NA	NA	Not tested	Not tested	NA	NA	4
W397	LTRI-572	DEC (14) 2019	pre-COVID-19	BAL	Negative for A B RSV	NA	NA	NA	NA	NA	Not tested	Not tested	NA	NA	4
W398	LTRI-573	DEC (14) 2019	pre-COVID-19	BAL	Negative for A B RSV	NA	NA	NA	NA	NA	Not tested	Not tested	NA	NA	4
W399	LTRI-574	DEC (14) 2019	pre-COVID-19		Negative	NA	NA	NA	NA	NA	Not tested	Not tested	NA	NA	4
W400	LTRI-575	DEC (14) 2019	pre-COVID-19	BAL	Negative for A B RSV	NA	NA	NA	NA	NA	Not tested	Not tested	NA	NA	4
W401	LTRI-576	DEC (14) 2019	pre-COVID-19	BAL	Negative for PJP and Galactomannan	NA	NA	NA	NA	NA	Not tested	Not tested	NA	NA	4
W402	LTRI-577	DEC (14) 2019	pre-COVID-19	NASOP	Negative for A B RSV	NA	NA	NA	NA	NA	Not tested	Not tested	NA	NA	4
W391	LTRI-578	DEC (14) 2019	pre-COVID-19	NASOP	Negative for A B RSV	NA	NA	NA	NA	NA	Not tested	Not tested	NA	NA	4
W404	LTRI-579	DEC (14) 2019	pre-COVID-19	BAL	Negative for A B RSV	NA	NA	NA	NA	NA	Not tested	Not tested	NA	NA	4
W405	LTRI-580	DEC (14) 2019	pre-COVID-19	NASOP	Negative for A B RSV	NA	NA	NA	NA	NA	Not tested	Not tested	NA	NA	4
W406	LTRI-581	DEC (14) 2019	pre-COVID-19	NASOP	Negative for A B RSV	NA	NA	NA	NA	NA	Not tested	Not tested	NA	NA	4
W407	LTRI-582	DEC (14) 2019	pre-COVID-19	BAL	Negative for A B RSV	NA	NA	NA	NA	NA	Not tested	Not tested	NA	NA	4
W408	LTRI-583	DEC (14) 2019	pre-COVID-19	NASOP	Negative for A B RSV	NA	NA	NA	NA	NA	Not tested	Not tested	NA	NA	4
W409	LTRI-584	DEC (14) 2019	pre-COVID-19	BAL	Negative for PJP and Galactomannan	NA	NA	NA	NA	NA	Not tested	Not tested	NA	NA	4
W410	LTRI-585	DEC (14) 2019	pre-COVID-19	BAL	Negative for A B RSV	NA	NA	NA	NA	NA	Not tested	Not tested	NA	NA	4
W411	LTRI-586	DEC (14) 2019	pre-COVID-19	BAL	Negative for A B RSV	NA	NA	NA	NA	NA	Not tested	Not tested	NA	NA	4
W412	LTRI-587	DEC (14) 2019	pre-COVID-19	BAL	Negative for A B RSV	NA	NA	NA	NA	NA	Not tested	Not tested	NA	NA	4
W413	LTRI-588	DEC (14) 2019	pre-COVID-19	BAL	Negative for A B RSV	NA	NA	NA	NA	NA	Not tested	Not tested	NA	NA	4
W414	LTRI-589	DEC (14) 2019	pre-COVID-19	BAL	Negative for A B RSV	NA	NA	NA	NA	NA	Not tested	Not tested	NA	NA	4
W415	LTRI-590	DEC (14) 2019	pre-COVID-19	BAL	Negative for A B RSV	NA	NA	NA	NA	NA	Not tested	Not tested	NA	NA	4
W416	LTRI-591	DEC (14) 2019	pre-COVID-19	BAL	Negative for A B RSV	NA	NA	NA	NA	NA	Not tested	Not tested	NA	NA	4
W417	LTRI-592	DEC (14) 2019	pre-COVID-19	BAL	Negative for A B RSV	NA	NA	NA	NA	NA	Not tested	Not tested	NA	NA	4
W418	LTRI-593	DEC (14) 2019	pre-COVID-19	BAL	Negative for A B RSV	NA	NA	NA	NA	NA	Not tested	Not tested	NA	NA	4
W419	LTRI-594	DEC (14) 2019	pre-COVID-19	BAL	Negative for A B RSV	NA	NA	NA	NA	NA	Not tested	Not tested	NA	NA	4
W420	LTRI-595	DEC (14) 2019	pre-COVID-19	BAL	Negative for PJP and Galactomannan	NA	NA	NA	NA	NA	Not tested	Not tested	NA	NA	4
W421	LTRI-596	DEC (14) 2019	pre-COVID-19	BAL	PJP Detected	NA	NA	NA	NA	NA	Not tested	Not tested	NA	NA	4
W422	LTRI-597	DEC (14) 2019	pre-COVID-19	NASOP	Negative for A B RSV	NA	NA	NA	NA	NA	Not tested	Not tested	NA	NA	4
W423	LTRI-598	DEC (14) 2019	pre-COVID-19	NASOP	Negative for A B RSV	NA	NA	NA	NA	NA	Not tested	Not tested	NA	NA	4
W424	LTRI-599	DEC (14) 2019	pre-COVID-19	BAL	Negative for A B RSV	NA	NA	NA	NA	NA	Not tested	Not tested	NA	NA	4
W425	LTRI-600	DEC (14) 2019	pre-COVID-19	BAL	Negative for Galactomannan	NA	NA	NA	NA	NA	Not tested	Not tested	NA	NA	4
W426	LTRI-601	DEC (14) 2019	pre-COVID-19	Tissue	CMV Detected	NA	NA	NA	NA	NA	Not tested	Not tested	NA	NA	4
W427	LTRI-602	DEC (14) 2019	pre-COVID-19	NASOP	Negative for A B RSV	NA	NA	NA	NA	NA	Not tested	Not tested	NA	NA	4
W428	LTRI-603	DEC (14) 2019	pre-COVID-19	NASOP	Negative for A B RSV	NA	NA	NA	NA	NA	Not tested	Not tested	NA	NA	4
W429	LTRI-604	DEC (14) 2019	pre-COVID-19	NASOP	Negative for A B RSV	NA	NA	NA	NA	NA	Not tested	Not tested	NA	NA	4
W430	LTRI-605	DEC (14) 2019	pre-COVID-19	BAL	Negative for A B RSV	NA	NA	NA	NA	NA	Not tested	Not tested	NA	NA	4
W431	LTRI-606	DEC (14) 2019	pre-COVID-19	BAL	Negative for A B RSV	NA	NA	NA	NA	NA	Not tested	Not tested	NA	NA	4
W432	LTRI-607	DEC (14) 2019	pre-COVID-19	BAL	Negative for A B RSV	NA	NA	NA	NA	NA	Not tested	Not tested	NA	NA	4
W433	LTRI-608	DEC (14) 2019	pre-COVID-19	BAL	Negative for A B RSV	NA	NA	NA	NA	NA	Not tested	Not tested	NA	NA	4
W434	LTRI-609	DEC (14) 2019	pre-COVID-19	BAL	Negative for A B RSV	NA	NA	NA	NA	NA	Not tested	Not tested	NA	NA	4
W435	LTRI-610	DEC (14) 2019	pre-COVID-19	BAL	Respiratory syncytial virus	NA	NA	NA	NA	NA	Not tested	Not tested	NA	NA	4
W436	LTRI-611	DEC (14) 2019	pre-COVID-19	BAL	Negative for A B RSV	NA	NA	NA	NA	NA	Not tested	Not tested	NA	NA	4
W437	LTRI-612	DEC (14) 2019	pre-COVID-19	BAL	Negative for A B RSV	NA	NA	NA	NA	NA	Not tested	Not tested	NA	NA	4
W438	LTRI-613	DEC (14) 2019	pre-COVID-19	BAL	Negative for A B RSV	NA	NA	NA	NA	NA	Not tested	Not tested	NA	NA	4
W439	LTRI-614	DEC (14) 2019	pre-COVID-19	BALCF	Negative for A B RSV	NA	NA	NA	NA	NA	Not tested	Not tested	NA	NA	4
W440	LTRI-615	DEC (14) 2019	pre-COVID-19	BAL	Negative for A B RSV	NA	NA	NA	NA	NA	Not tested	Not tested	NA	NA	4
W441	LTRI-616	DEC (14) 2019	pre-COVID-19	BAL	Negative for A B RSV	NA	NA	NA	NA	NA	Not tested	Not tested	NA	NA	4
W442	LTRI-617	DEC (14) 2019	pre-COVID-19	BAL	Negative for A B RSV	NA	NA	NA	NA	NA	Not tested	Not tested	NA	NA	4
W443	LTRI-618	DEC (14) 2019	pre-COVID-19	NASOP	Negative for A B RSV	NA	NA	NA	NA	NA	Not tested	Not tested	NA	NA	4
W444	LTRI-619	DEC (14) 2019	pre-COVID-19	NNP	Negative for A B RSV	NA	NA	NA	NA	NA	Not tested	Not tested	NA	NA	4
W445	LTRI-620	DEC (14) 2019	pre-COVID-19	NASOP	Negative for A B RSV	NA	NA	NA	NA	NA	Not tested	Not tested	NA	NA	4
W446	LTRI-621	DEC (14) 2019	pre-COVID-19	NASOP	Negative for A B RSV	NA	NA	NA	NA	NA	Not tested	Not tested	NA	NA	4
W447	LTRI-622	DEC (14) 2019	pre-COVID-19	Pericardial Fluid	Negative for CMV, HSV, VZV, Enterovirus, TB	NA	NA	NA	NA	NA	Not tested	Not tested	NA	NA	4
W448	LTRI-623	DEC (14) 2019	pre-COVID-19	BAL	Negative for A B RSV	NA	NA	NA	NA	NA	Not tested	Not tested	NA	NA	4
W449	LTRI-624	DEC (14) 2019	pre-COVID-19	NAS	Negative for A B RSV	NA	NA	NA	NA	NA	Not tested	Not tested	NA	NA	4
W450	LTRI-625	DEC (14) 2019	pre-COVID-19	NASOP	Negative for A B RSV	NA	NA	NA	NA	NA	Not tested	Not tested	NA	NA	4
W451	LTRI-626	DEC (14) 2019	pre-COVID-19	BAL	Negative for A B RSV	NA	NA	NA	NA	NA	Not tested	Not tested	NA	NA	4
W452	LTRI-627	DEC (14) 2019	pre-COVID-19	BAL	Negative for A B RSV	NA	NA	NA	NA	NA	Not tested	Not tested	NA	NA	4
W453	LTRI-628	DEC (14) 2019	pre-COVID-19	NASOP	Negative for A B RSV	NA	NA	NA	NA	NA	Not tested	Not tested	NA	NA	4
W454	LTRI-629	DEC (14) 2019	pre-COVID-19	NASOP	Negative for A B RSV	NA	NA	NA	NA	NA	Not tested	Not tested	NA	NA	4
W455	LTRI-630	DEC (14) 2019	pre-COVID-19	NASOP	Negative for A B RSV	NA	NA	NA	NA	NA	Not tested	Not tested	NA	NA	4
W456	LTRI-631	DEC (14) 2019	pre-COVID-19	BAL	Negative for A B RSV	NA	NA	NA	NA	NA	Not tested	Not tested	NA	NA	4
W673	LTRI-632	DEC (14) 2019	pre-COVID-19	NASOP	Negative for A B RSV	NA	NA	NA	NA	NA	Not tested	Not tested	NA	NA	4
W674	LTRI-633	DEC (14) 2019	pre-COVID-19	BAL	Negative for A B RSV	NA	NA	NA	NA	NA	Not tested	Not tested	NA	NA	4
W675	LTRI-634	DEC (14) 2019	pre-COVID-19	BAL	Negative for A B RSV	NA	NA	NA	NA	NA	Not tested	Not tested	NA	NA	4
W676	LTRI-635	DEC (14) 2019	pre-COVID-19	BAL	Negative for A B RSV	NA	NA	NA	NA	NA	Not tested	Not tested	NA	NA	4
W677	LTRI-636	DEC (14) 2019	pre-COVID-19	BAL	Negative for A B RSV	NA	NA	NA	NA	NA	Not tested	Not tested	NA	NA	4
W678	LTRI-637	DEC (14) 2019	pre-COVID-19	BAL	Negative for A B RSV	NA	NA	NA	NA	NA	Not tested	Not tested	NA	NA	4
W590	LTRI-638	DEC (14) 2019	pre-COVID-19	BAL	Negative for A B RSV	NA	NA	NA	NA	NA	Not tested	Not tested	NA	NA	4
W680	LTRI-639	DEC (14) 2019	pre-COVID-19	BAL	Negative for A B RSV	NA	NA	NA	NA	NA	Not tested	Not tested	NA	NA	4
W681	LTRI-640	DEC (14) 2019	pre-COVID-19	BAL	Negative for A B RSV	NA	NA	NA	NA	NA	Not tested	Not tested	NA	NA	4
W591	LTRI-641	DEC (14) 2019	pre-COVID-19	BAL	Negative for A B RSV	NA	NA	NA	NA	NA	Not tested	Not tested	NA	NA	4
W592	LTRI-642	DEC (14) 2019	pre-COVID-19	BAL	Negative for A B RSV	NA	NA	NA	NA	NA	Not tested	Not tested	NA	NA	4
W593	LTRI-643	DEC (14) 2019	pre-COVID-19	BAL	Negative for A B RSV	NA	NA	NA	NA	NA	Not tested	Not tested	NA	NA	4
W685	LTRI-644	DEC (14) 2019	pre-COVID-19	BAL	Negative for A B RSV	NA	NA	NA	NA	NA	Not tested	Not tested	NA	NA	4
W686	LTRI-645	DEC (14) 2019	pre-COVID-19	BAL	Negative for A B RSV	NA	NA	NA	NA	NA	Not tested	Not tested	NA	NA	4
W687	LTRI-646	DEC (14) 2019	pre-COVID-19	BAL	Influenza A virus	NA	NA	NA	NA	NA	Not tested	Not tested	NA	NA	4
W688	LTRI-647	DEC (14) 2019	pre-COVID-19	BAL	Negative for A B RSV	NA	NA	NA	NA	NA	Not tested	Not tested	NA	NA	4
W689	LTRI-648	DEC (14) 2019	pre-COVID-19	BAL	Negative for A B RSV	NA	NA	NA	NA	NA	Not tested	Not tested	NA	NA	4
W690	LTRI-649	DEC (14) 2019	pre-COVID-19	BAL	Negative for A B RSV	NA	NA	NA	NA	NA	Not tested	Not tested	NA	NA	4
W691	LTRI-650	DEC (14) 2019	pre-COVID-19	BAL	Negative for A B RSV	NA	NA	NA	NA	NA	Not tested	Not tested	NA	NA	4
W692	LTRI-651	DEC (14) 2019	pre-COVID-19	BAL	Negative for A B RSV	NA	NA	NA	NA	NA	Not tested	Not tested	NA	NA	4
W693	LTRI-652	DEC (14) 2019	pre-COVID-19	NASOP	Negative for A B RSV	NA	NA	NA	NA	NA	Not tested	Not tested	NA	NA	4
W694	LTRI-653	DEC (14) 2019	pre-COVID-19	NASOP	Negative for A B RSV	NA	NA	NA	NA	NA	Not tested	Not tested	NA	NA	4
W695	LTRI-654	DEC (14) 2019	pre-COVID-19	BAL	Influenza A virus	NA	NA	NA	NA	NA	Not tested	Not tested	NA	NA	4
W696	LTRI-655	DEC (14) 2019	pre-COVID-19	BAL	PJP Detected	NA	NA	NA	NA	NA	Not tested	Not tested	NA	NA	4
W697	LTRI-656	DEC (14) 2019	pre-COVID-19	BAL	Negative for PJP and Galactomannan	NA	NA	NA	NA	NA	Not tested	Not tested	NA	NA	4
W698	LTRI-657	DEC (14) 2019	pre-COVID-19	BAL	Negative for PJP and Galactomannan	NA	NA	NA	NA	NA	Not tested	Not tested	NA	NA	4
W699	LTRI-658	DEC (14) 2019	pre-COVID-19	BAL	Influenza A virus	NA	NA	NA	NA	NA	Not tested	Not tested	NA	NA	4
W700	LTRI-659	DEC (14) 2019	pre-COVID-19	BAL	Negative for A B RSV	NA	NA	NA	NA	NA	Not tested	Not tested	NA	NA	4
W701	LTRI-660	DEC (14) 2019	pre-COVID-19	NASOP	Negative for A B RSV	NA	NA	NA	NA	NA	Not tested	Not tested	NA	NA	4
W702	LTRI-661	DEC (14) 2019	pre-COVID-19	NASOP	Negative for A B RSV	NA	NA	NA	NA	NA	Not tested	Not tested	NA	NA	4
W703	LTRI-662	DEC (14) 2019	pre-COVID-19	NASOP	Negative for A B RSV	NA	NA	NA	NA	NA	Not tested	Not tested	NA	NA	4
W704	LTRI-663	DEC (14) 2019	pre-COVID-19	BAL	PJP Detected	NA	NA	NA	NA	NA	Not tested	Not tested	NA	NA	4
W705	LTRI-664	DEC (14) 2019	pre-COVID-19	BAL	Negative for PJP	NA	NA	NA	NA	NA	Not tested	Not tested	NA	NA	4
W706	LTRI-665	DEC (14) 2019	pre-COVID-19	BAL	Negative for A B RSV	NA	NA	NA	NA	NA	Not tested	Not tested	NA	NA	4
W707	LTRI-666	DEC (14) 2019	pre-COVID-19	BAL	Negative for A B RSV	NA	NA	NA	NA	NA	Not tested	Not tested	NA	NA	4
W708	LTRI-667	DEC (14) 2019	pre-COVID-19	BAL	Influenza A virus	NA	NA	NA	NA	NA	Not tested	Not tested	NA	NA	4
W709	LTRI-668	DEC (14) 2019	pre-COVID-19	NASOP	Negative for A B RSV	NA	NA	NA	NA	NA	Not tested	Not tested	NA	NA	4
W710	LTRI-669	DEC (14) 2019	pre-COVID-19	NASOP	Negative for A B RSV	NA	NA	NA	NA	NA	Not tested	Not tested	NA	NA	4
W711	LTRI-670	DEC (14) 2019	pre-COVID-19	BAL	Negative for A B RSV	NA	NA	NA	NA	NA	Not tested	Not tested	NA	NA	4
W712	LTRI-671	DEC (14) 2019	pre-COVID-19	BAL	Influenza A virus	NA	NA	NA	NA	NA	Not tested	Not tested	NA	NA	4
W713	LTRI-672	DEC (14) 2019	pre-COVID-19	BAL	Negative for PJP and Galactomannan	NA	NA	NA	NA	NA	Not tested	Not tested	NA	NA	4
W714	LTRI-673	DEC (14) 2019	pre-COVID-19	NASOP	Negative for A B RSV	NA	NA	NA	NA	NA	Not tested	Not tested	NA	NA	4
W715	LTRI-674	DEC (14) 2019	pre-COVID-19	NASOP	Negative for A B RSV	NA	NA	NA	NA	NA	Not tested	Not tested	NA	NA	4
W716	LTRI-675	DEC (14) 2019	pre-COVID-19	NASOP	Negative for A B RSV	NA	NA	NA	NA	NA	Not tested	Not tested	NA	NA	4
W717	LTRI-676	DEC (14) 2019	pre-COVID-19	NASOP	Negative for A B RSV	NA	NA	NA	NA	NA	Not tested	Not tested	NA	NA	4
W718	LTRI-677	DEC (14) 2019	pre-COVID-19	NASOP	Negative for A B RSV	NA	NA	NA	NA	NA	Not tested	Not tested	NA	NA	4
W719	LTRI-678	DEC (14) 2019	pre-COVID-19	NASOP	Negative for A B RSV	NA	NA	NA	NA	NA	Not tested	Not tested	NA	NA	4
W720	LTRI-679	DEC (14) 2019	pre-COVID-19	BAL	Negative for A B RSV	NA	NA	NA	NA	NA	Not tested	Not tested	NA	NA	4
W721	LTRI-680	DEC (30) 2019	pre-COVID-19	BAL	Negative for PJP	NA	NA	NA	NA	NA	Not tested	Not tested	NA	NA	4
W722	LTRI-681	DEC (30) 2019	pre-COVID-19	BAL	Negative for A B RSV	NA	NA	NA	NA	NA	Not tested	Not tested	NA	NA	4
W723	LTRI-682	DEC (30) 2019	pre-COVID-19	BAL	Negative for A B RSV	NA	NA	NA	NA	NA	Not tested	Not tested	NA	NA	4
W724	LTRI-683	DEC (30) 2019	pre-COVID-19	BAL	Negative for A B RSV	NA	NA	NA	NA	NA	Not tested	Not tested	NA	NA	4
W725	LTRI-684	DEC (30) 2019	pre-COVID-19	BAL	Negative for A B RSV	NA	NA	NA	NA	NA	Not tested	Not tested	NA	NA	4
W726	LTRI-685	DEC (30) 2019	pre-COVID-19	BAL	Negative for A B RSV	NA	NA	NA	NA	NA	Not tested	Not tested	NA	NA	4
W727	LTRI-686	DEC (30) 2019	pre-COVID-19	NASOP	Negative for A B RSV	NA	NA	NA	NA	NA	Not tested	Not tested	NA	NA	4
W728	LTRI-687	DEC (30) 2019	pre-COVID-19	NASOP	Negative for A B RSV	NA	NA	NA	NA	NA	Not tested	Not tested	NA	NA	4
W729	LTRI-688	JAN (3) 2020	pre-COVID-19	NASOP	Respiratory syncytial virus	NA	NA	NA	NA	NA	Not tested	Not tested	NA	NA	4
W730	LTRI-689	JAN (3) 2020	pre-COVID-19	BAL	Negative for A B RSV	NA	NA	NA	NA	NA	Not tested	Not tested	NA	NA	4
W731	LTRI-690	JAN (3) 2020	pre-COVID-19	BAL	Negative for A B RSV	NA	NA	NA	NA	NA	Not tested	Not tested	NA	NA	4
W732	LTRI-691	JAN (3) 2020	pre-COVID-19	BAL	Negative for A B RSV	NA	NA	NA	NA	NA	Not tested	Not tested	NA	NA	4
W733	LTRI-692	JAN (3) 2020	pre-COVID-19	NASOP	Respiratory syncytial virus	NA	NA	NA	NA	NA	Not tested	Not tested	NA	NA	4
W734	LTRI-693	JAN (3) 2020	pre-COVID-19	NASOP	Influenza A virus	NA	NA	NA	NA	NA	Not tested	Not tested	NA	NA	4
W735	LTRI-694	JAN (3) 2020	pre-COVID-19	NASOP	Influenza A H1N1 pdm09 (formerly Swine) virus	NA	NA	NA	NA	NA	Not tested	Not tested	NA	NA	4
W736	LTRI-695	JAN (3) 2020	pre-COVID-19	BAL	Influenza A H1N1 pdm09 (formerly Swine) virus	NA	NA	NA	NA	NA	Not tested	Not tested	NA	NA	4
W737	LTRI-696	JAN (3) 2020	pre-COVID-19	NASOP	Negative for A B RSV	NA	NA	NA	NA	NA	Not tested	Not tested	NA	NA	4
W738	LTRI-697	JAN (3) 2020	pre-COVID-19	BAL	Influenza A virus/Respiratory syncytial virus	NA	NA	NA	NA	NA	Not tested	Not tested	NA	NA	4
W739	LTRI-698	JAN (3) 2020	pre-COVID-19	BAL	Negative for PJP and Galactomannan	NA	NA	NA	NA	NA	Not tested	Not tested	NA	NA	4
W740	LTRI-699	JAN (3) 2020	pre-COVID-19	NASOP	Negative for A B RSV	NA	NA	NA	NA	NA	Not tested	Not tested	NA	NA	4
W741	LTRI-700	JAN (3) 2020	pre-COVID-19	NASOP	Influenza A H1N1 pdm09 (formerly Swine) virus	NA	NA	NA	NA	NA	Not tested	Not tested	NA	NA	4
W742	LTRI-701	JAN (3) 2020	pre-COVID-19	BAL	Negative for A B RSV	NA	NA	NA	NA	NA	Not tested	Not tested	NA	NA	4
W743	LTRI-702	JAN (3) 2020	pre-COVID-19	BAL	Negative for A B RSV	NA	NA	NA	NA	NA	Not tested	Not tested	NA	NA	4
W744	LTRI-703	JAN (3) 2020	pre-COVID-19	NASOP	Negative for A B RSV	NA	NA	NA	NA	NA	Not tested	Not tested	NA	NA	4
W668	LTRI-704	JAN (3) 2020	pre-COVID-19	NASOP	Negative for A B RSV	NA	NA	NA	Un	27.55	Negative	Negative	NA	NA	4
W626	LTRI-705	JAN (3) 2020	pre-COVID-19	BAL	Negative for A B RSV	NA	NA	NA	Un	22.78	Negative	Negative	NA	NA	4
W627	LTRI-706	JAN (3) 2020	pre-COVID-19	BAL	Negative for A B RSV	NA	NA	NA	Un	33.52	Inconclusive	Inconclusive	NA	NA	4
W628	LTRI-707	JAN (3) 2020	pre-COVID-19	BAL	Negative for A B RSV	NA	NA	NA	Un	19.35	Negative	Negative	NA	NA	4
W629	LTRI-708	JAN (3) 2020	pre-COVID-19	BAL	Negative for A B RSV	NA	NA	NA	Un	29.96	Negative	Negative	NA	NA	4
W630	LTRI-709	JAN (3) 2020	pre-COVID-19	BAL	Negative for A B RSV	NA	NA	NA	44.43	19.72	Negative	Negative	NA	NA	4
W631	LTRI-710	JAN (3) 2020	pre-COVID-19	NASOP	Negative for A B RSV	NA	NA	NA	Un	25.92	Negative	Negative	NA	NA	4
W632	LTRI-711	JAN (3) 2020	pre-COVID-19	NASOP	Negative for A B RSV	NA	NA	NA	Un	25.46	Negative	Negative	NA	NA	4
W633	LTRI-712	JAN (3) 2020	pre-COVID-19	NASOP	Negative for A B RSV; Enterovirus/Rhinovirus DETECTED	NA	NA	NA	Un	26.17	Negative	Negative	NA	NA	4
W634	LTRI-713	JAN (3) 2020	pre-COVID-19	NASOP	Negative for A B RSV	NA	NA	NA	Un	24.37	Negative	Negative	NA	NA	4
W635	LTRI-714	JAN (3) 2020	pre-COVID-19	BAL	Negative for A B RSV	NA	NA	NA	Un	26.28	Negative	Negative	NA	NA	4
W636	LTRI-715	JAN (3) 2020	pre-COVID-19	BAL	Negative for A B RSV	NA	NA	NA	Un	31.58	Negative	Negative	NA	NA	4
W669	LTRI-716	JAN (3) 2020	pre-COVID-19	BAL	Negative for A B RSV	NA	NA	NA	Un	30.45	Negative	Negative	NA	NA	4
W638	LTRI-717	JAN (3) 2020	pre-COVID-19	BAL	Negative for A B RSV	NA	NA	NA	Un	26.41	Negative	Negative	NA	NA	4
W639	LTRI-718	JAN (3) 2020	pre-COVID-19	BAL	Negative for A B RSV	NA	NA	NA	Un	27.12	Negative	Negative	NA	NA	4
W640	LTRI-719	JAN (3) 2020	pre-COVID-19	BAL	Negative for A B RSV	NA	NA	NA	Un	22.85	Negative	Negative	NA	NA	4
W641	LTRI-720	JAN (3) 2020	pre-COVID-19	NASOP	Negative for A B RSV	NA	NA	NA	Un	25.56	Negative	Negative	NA	NA	4
W642	LTRI-721	JAN (3) 2020	pre-COVID-19	NASOP	Negative for A B RSV	NA	NA	NA	Un	23.29	Negative	Negative	NA	NA	4
W643	LTRI-722	JAN (3) 2020	pre-COVID-19	NASOP	Negative for A B RSV	NA	NA	NA	Un	24.18	Negative	Negative	NA	NA	4
W644	LTRI-723	JAN (3) 2020	pre-COVID-19	NASOP	Negative for A B RSV	NA	NA	NA	Un	25.98	Negative	Negative	NA	NA	4
W645	LTRI-724	JAN (3) 2020	pre-COVID-19	NASOP	Negative for A B RSV	NA	NA	NA	Un	23.1	Negative	Negative	NA	NA	4
W646	LTRI-725	JAN (3) 2020	pre-COVID-19	NASOP	Influenza A virus	NA	NA	NA	Un	24.26	Negative	Negative	NA	NA	4
W647	LTRI-726	JAN (3) 2020	pre-COVID-19	NASOP	Negative for A B RSV	NA	NA	NA	Un	26.17	Negative	Negative	NA	NA	4
W648	LTRI-727	JAN (3) 2020	pre-COVID-19	BAL	Negative for A B RSV	NA	NA	NA	Un	25.45	Negative	Negative	NA	NA	4
W604	LTRI-728	JAN (3) 2020	pre-COVID-19	BAL	Negative for PJP	NA	NA	NA	Un	21.4	Negative	Negative	NA	NA	4
W026	LTRI-729	JAN (3) 2020	pre-COVID-19	NASOP	Negative for A B RSV	NA	NA	NA	Un	25.04	Negative	Negative	NA	NA	4
W027	LTRI-730	JAN (3) 2020	pre-COVID-19	NASOP	Negative for A B RSV	NA	NA	NA	Un	26.32	Negative	Negative	NA	NA	4
W028	LTRI-731	JAN (3) 2020	pre-COVID-19	NASOP	Negative for A B RSV	NA	NA	NA	Un	27.12	Negative	Negative	NA	NA	4
W029	LTRI-732	JAN (3) 2020	pre-COVID-19	NASOP	Negative for A B RSV	NA	NA	NA	Un	27.27	Negative	Negative	NA	NA	4
W030	LTRI-733	JAN (3) 2020	pre-COVID-19	BAL	Negative for A B RSV	NA	NA	NA	Un	28.44	Negative	Negative	NA	NA	4
W031	LTRI-734	JAN (3) 2020	pre-COVID-19	BAL	Negative for A B RSV	NA	NA	NA	Un	25.84	Negative	Negative	NA	NA	4
W032	LTRI-735	JAN (3) 2020	pre-COVID-19	BAL	Negative for A B RSV	NA	NA	NA	Un	24.96	Negative	Negative	NA	NA	4
W033	LTRI-736	JAN (3) 2020	pre-COVID-19	BAL	Negative for A B RSV	NA	NA	NA	Un	23.52	Negative	Negative	NA	NA	4
W034	LTRI-737	JAN (3) 2020	pre-COVID-19	BAL	Negative for A B RSV	NA	NA	NA	28.62	30	Negative (Irregular CoV-2 curve)	Negative (Irregular CoV-2 curve)	NA	NA	4
W035	LTRI-738	JAN (3) 2020	pre-COVID-19	BAL	Negative for A B RSV	NA	NA	NA	Un	26.15	Negative	Negative	NA	NA	4
W036	LTRI-739	JAN (3) 2020	pre-COVID-19	BAL	Negative for A B RSV	NA	NA	NA	Un	24.51	Negative	Negative	NA	NA	4
W605	LTRI-740	JAN (3) 2020	pre-COVID-19	BAL	Negative for A B RSV	NA	NA	NA	Un	21.4	Negative	Negative	NA	NA	4
W038	LTRI-741	JAN (3) 2020	pre-COVID-19	BAL	Negative for A B RSV	NA	NA	NA	Un	28.63	Negative	Negative	NA	NA	4
W039	LTRI-742	JAN (3) 2020	pre-COVID-19	NASOP	Influenza B virus	NA	NA	NA	Un	23.78	Negative	Negative	NA	NA	4
W040	LTRI-743	JAN (3) 2020	pre-COVID-19	NASOP	Negative for A B RSV	NA	NA	NA	Un	27.48	Negative	Negative	NA	NA	4
W041	LTRI-744	JAN (3) 2020	pre-COVID-19	NASOP	Negative for A B RSV	NA	NA	NA	Un	24.52	Negative	Negative	NA	NA	4
W042	LTRI-745	JAN (3) 2020	pre-COVID-19	NASOP	Negative for A B RSV	NA	NA	NA	Un	23.83	Negative	Negative	NA	NA	4
W043	LTRI-746	JAN (3) 2020	pre-COVID-19	NASOP	Negative for A B RSV	NA	NA	NA	Un	25.44	Negative	Negative	NA	NA	4
W044	LTRI-747	JAN (3) 2020	pre-COVID-19	NASOP	Negative for A B RSV	NA	NA	NA	Un	26.16	Negative	Negative	NA	NA	4
W045	LTRI-748	JAN (3) 2020	pre-COVID-19	NASOP	Negative for A B RSV	NA	NA	NA	37.93	24.67	Negative	Negative	NA	NA	4
W046	LTRI-749	JAN (3) 2020	pre-COVID-19	BAL	Influenza A virus	NA	NA	NA	Un	22.19	Negative	Negative	NA	NA	4
W047	LTRI-750	JAN (3) 2020	pre-COVID-19	NASOP	Negative for A B RSV	NA	NA	NA	Un	23.44	Negative	Negative	NA	NA	4
W048	LTRI-751	JAN (3) 2020	pre-COVID-19	BAL	Negative for A B RSV	NA	NA	NA	Un	30.02	Negative	Negative	NA	NA	4
W606	LTRI-752	JAN (3) 2020	pre-COVID-19	BAL	Negative for A B RSV	NA	NA	NA	NA	NA	Not tested	Not tested	NA	NA	4
W050	LTRI-753	JAN (3) 2020	pre-COVID-19	BAL	Negative for A B RSV	NA	NA	NA	NA	NA	Not tested	Not tested	NA	NA	4
W051	LTRI-754	JAN (3) 2020	pre-COVID-19	BAL	Negative for A B RSV	NA	NA	NA	NA	NA	Not tested	Not tested	NA	NA	4
W052	LTRI-755	JAN (3) 2020	pre-COVID-19	BAL	Negative for A B RSV	NA	NA	NA	NA	NA	Not tested	Not tested	NA	NA	4
W053	LTRI-756	JAN (3) 2020	pre-COVID-19	BAL	Negative for A B RSV	NA	NA	NA	NA	NA	Not tested	Not tested	NA	NA	4
W054	LTRI-757	JAN (3) 2020	pre-COVID-19	BAL	Negative for A B RSV	NA	NA	NA	NA	NA	Not tested	Not tested	NA	NA	4
W055	LTRI-758	JAN (3) 2020	pre-COVID-19	NASOP	Negative for A B RSV	NA	NA	NA	NA	NA	Not tested	Not tested	NA	NA	4
W056	LTRI-759	JAN (3) 2020	pre-COVID-19	NASOP	Respiratory syncytial virus	NA	NA	NA	NA	NA	Not tested	Not tested	NA	NA	4
W057	LTRI-760	JAN (3) 2020	pre-COVID-19	BAL	Negative for PJP and Galactomannan	NA	NA	NA	NA	NA	Not tested	Not tested	NA	NA	4
W058	LTRI-761	JAN (3) 2020	pre-COVID-19	BAL	Negative for A B RSV	NA	NA	NA	NA	NA	Not tested	Not tested	NA	NA	4
W059	LTRI-762	JAN (3) 2020	pre-COVID-19	BAL	Negative for A B RSV	NA	NA	NA	NA	NA	Not tested	Not tested	NA	NA	4
W060	LTRI-763	JAN (3) 2020	pre-COVID-19	BAL	Negative for A B RSV	NA	NA	NA	NA	NA	Not tested	Not tested	NA	NA	4
W289	LTRI-776	May (12) 2020	post-COVID-19	NASOP	COVID-19 postive (not tested by 'Seegene assay')				22.53	21.91	Positive	Positive	62627.8	53264.9	3,4
W290	LTRI-777	May (12) 2020	post-COVID-19	NASOP	COVID-19 postive	22.23	24.12	22.92	25.72	21.85	Positive	Positive	7684.46	6535.62	3,4
W291	LTRI-778	May (12) 2020	post-COVID-19	NASOP	COVID-19 postive	26.91	28.27	29.85	30.51	26.1	Positive	Positive	329.81	280.503	3,4
W292	LTRI-779	May (12) 2020	post-COVID-19	NASOP	COVID-19 postive	21.22	23.07	23.74	24.03	24.35	Positive	Positive	23234.5	19760.9	3,4
W294	LTRI-781	May (12) 2020	post-COVID-19	NASOP	COVID-19 postive	25.98	27.19	26.17	26.57	26.11	Positive	Positive	4393.9	3737	3,4
W296	LTRI-783	May (12) 2020	post-COVID-19	NASOP	COVID-19 postive	ND	ND	38.74	36.75	22.59	Positive	Negative	5.45	4.63522	4
W298	LTRI-785	May (12) 2020	post-COVID-19	NASOP	COVID-19 postive	24.22	25.39	26.66	31.46	23.09	Positive	Positive	176.55	150.155	4
W300	LTRI-787	May (12) 2020	post-COVID-19	NASOP	COVID-19 postive	29.17	31.29	32.36	36.51	20.83	Positive	Negative	6.39	5.43468	4
W302	LTRI-789	May (12) 2020	post-COVID-19	NASOP	COVID-19 postive	19.45	20.44	19.97	24.84	21.74	Positive	Positive	13688.1	11641.7	3,4
W303	LTRI-790	May (12) 2020	post-COVID-19	NASOP	COVID-19 negative	ND	ND	38.97	Un	23.39	Negative	Negative	NA	NA	3,4
W304	LTRI-791	May (12) 2020	post-COVID-19	NASOP	COVID-19 postive	14.04	16.43	16.15	19.37	19.19	Positive	Positive	498565	424029	3,4
W305	LTRI-792	May (12) 2020	post-COVID-19	NASOP	COVID-19 postive	25.73	27.26	27.46	31.05	21	Positive	Positive	231.15	196.593	3,4
W306	LTRI-793	May (12) 2020	post-COVID-19	NASOP	COVID-19 postive	28.97	30.41	30.78	33.53	23.35	Positive	Positive	45.45	38.6551	3,4
W307	LTRI-794	May (12) 2020	post-COVID-19	NASOP	COVID-19 postive	20.96	22.27	23.05	24.93	23.02	Positive	Positive	12916.8	10985.7	4
W309	LTRI-796	May (12) 2020	post-COVID-19	NASOP	COVID-19 postive	25.78	26.99	27.77	28.92	25.24	Positive	Positive	939.52	799.06	4
W311	LTRI-798	May (12) 2020	post-COVID-19	NASOP	COVID-19 postive	25.44	26.34	26.74	32.05	22.87	Positive	Positive	119.95	102.017	4
W313	LTRI-800	May (12) 2020	post-COVID-19	NASOP	COVID-19 postive	25.03	25.64	27.04	32.59	21.62	Positive	Positive	84.01	71.4504	3,4
W315	LTRI-802	May (12) 2020	post-COVID-19	NASOP	COVID-19 postive	30.98	30.51	30.92	34.18	20.62	Positive	Positive	29.52	25.1067	3,4
W316	LTRI-803	May (12) 2020	post-COVID-19	NASOP	COVID-19 postive	30.98	30.51	30.92	33.64	20.78	Positive	Positive	42.08	35.789	3,4
W317	LTRI-804	May (12) 2020	post-COVID-19	NASOP	COVID-19 postive (not tested by 'Seegene assay')				28.13	27.01	Positive	Positive	1570.97	1336.11	3,4
W318	LTRI-805	May (12) 2020	post-COVID-19	NASOP	COVID-19 postive (not tested by 'Seegene assay')				31.74	21.3	Positive	Positive	146.82	124.87	3,4
W320	LTRI-807	May (12) 2020	post-COVID-19	NASOP	COVID-19 postive	18.08	19.61	20.02	20.7	21.97	Positive	Positive	208333	177187	4
W323	LTRI-810	May (12) 2020	post-COVID-19	NASOP	COVID-19 postive	27.92	28.85	25.11	29.25	22.07	Positive	Positive	752.45	639.957	4
W327	LTRI-814	May (12) 2020	post-COVID-19	NASOP	COVID-19 postive	16.15	17.66	17.16	22.57	23.01	Positive	Positive	60664.8	51595.3	3,4
W328	LTRI-815	May (12) 2020	post-COVID-19	NASOP	COVID-19 postive	11.66	13.22	14.28	36.28	22.4	Positive	Negative	7.47	6.35322	3,4
W330	LTRI-817	May (12) 2020	post-COVID-19	NASOP	COVID-19 postive	14.04	16.13	16.44	22.78	20.62	Positive	Positive	52992.5	45070	3,4
W331	LTRI-818	May (12) 2020	post-COVID-19	NASOP	COVID-19 postive	18.36	19.98	19.71	25.51	20.37	Positive	Positive	8782.96	7469.89	4
W332	LTRI-819	May (12) 2020	post-COVID-19	NASOP	COVID-19 postive	26.84	27.99	30.19	30.1	22	Positive	Positive	431.78	367.228	4
W333	LTRI-820	May (12) 2020	post-COVID-19	NASOP	COVID-19 postive	21.24	22.9	22.97	26.16	23.1	Positive	Positive	5756.41	4895.82	4
W336	LTRI-823	May (12) 2020	post-COVID-19	NASOP	COVID-19 postive (not tested by 'Seegene assay')				31.27	23.1	Positive	Positive	200.51	170.533	4
W337	LTRI-824	May (12) 2020	post-COVID-19	NASOP	COVID-19 postive	29.11	30.76	32.44	33.21	26.31	Positive	Positive	56.1	47.713	3,4
W339	LTRI-826	May (12) 2020	post-COVID-19	NASOP	COVID-19 postive	21.95	23.44	24.83	26.1	21.9	Positive	Positive	5961.4	5070.16	3,4
W341	LTRI-828	May (12) 2020	post-COVID-19	NASOP	COVID-19 postive	24.04	24.75	25.58	29.72	19.94	Positive	Positive	554.17	471.321	3,4
W344	LTRI-831	May (12) 2020	post-COVID-19	NASOP	COVID-19 postive	26.87	28.22	28.5	35.81	21.34	Positive	Negative	10.11	8.59854	4
W345	LTRI-832	May (12) 2020	post-COVID-19	NASOP	COVID-19 postive	18.68	20.23	19.73	27.22	21.17	Positive	Positive	2871.14	2441.9	4
W346	LTRI-833	May (12) 2020	post-COVID-19	NASOP	COVID-19 postive	20.68	21.84	21.24	30.4	23.28	Positive	Positive	354.7	301.672	4
W348	LTRI-835	May (12) 2020	post-COVID-19	NASOP	COVID-19 postive	18.65	19.9	19.74	32.21	28.35	Positive	Positive	107.63	91.5391	4
W349	LTRI-836	May (12) 2020	post-COVID-19	NASOP	COVID-19 postive	13.61	15.47	15.81	25.71	25.28	Positive	Positive	7744.67	6586.83	3,4
W352	LTRI-839	May (12) 2020	post-COVID-19	NASOP	COVID-19 postive	19.47	20.93	21.55	27.16	21.48	Positive	Positive	2982.86	2536.92	3,4
W355	LTRI-842	May (12) 2020	post-COVID-19	NASOP	COVID-19 postive	29.23	29.45	30.46	32.09	20.81	Positive	Positive	116.95	99.4658	4
W358	LTRI-845	May (12) 2020	post-COVID-19	NASOP	COVID-19 postive (not tested by 'Seegene assay')				29.55	23.86	Positive	Positive	617.99	525.599	4
W359	LTRI-846	May (12) 2020	post-COVID-19	NASOP	COVID-19 postive (not tested by 'Seegene assay')				23.46	19.1	Positive	Positive	33776.5	28726.8	4
W616	LTRI-850	May (12) 2020	post-COVID-19	NASOP	COVID-19 postive	18.55	20.15	21.21	23.69	21.37	Positive	Positive	29169.5	24808.6	3,4
W621	LTRI-855	May (12) 2020	post-COVID-19	NASOP	COVID-19 postive	27.08	28.49	28.61	31.02	24.65	Positive	Positive	235.77	200.522	4
W202	LTRI-857	May (12) 2020	post-COVID-19	NASOP	COVID-19 postive	17.75	19.2	19.04	20.9	20.74	Positive	Positive	182647	155341	4
W203	LTRI-858	May (12) 2020	post-COVID-19	NASOP	COVID-19 postive (not tested by 'Seegene assay')				35.22	20.52	Positive	Negative	14.96	12.7235	4
W204	LTRI-859	May (12) 2020	post-COVID-19	NASOP	COVID-19 postive	23.1	24.11	25.38	25.56	23.16	Positive	Positive	8515.31	7242.26	4
W205	LTRI-860	May (12) 2020	post-COVID-19	NASOP	COVID-19 postive	27.19	28.12	29.31	33.61	27.49	Positive	Positive	42.93	36.5119	3,4
W207	LTRI-862	May (12) 2020	post-COVID-19	NASOP	COVID-19 postive	ND	ND	36.15	32.97	21.53	Positive	Positive	65.67	55.8522	3,4
W210	LTRI-865	May (12) 2020	post-COVID-19	NASOP	COVID-19 postive (not tested by 'Seegene assay')				23.17	19.9	Positive	Positive	41032.1	34897.7	3,4
W213	LTRI-868	May (12) 2020	post-COVID-19	NASOP	COVID-19 postive	ND	ND	35.1	27.88	20.19	Positive	Positive	1862.47	1584.03	4
W214	LTRI-869	May (12) 2020	post-COVID-19	NASOP	COVID-19 postive (not tested by 'Seegene assay')				34.02	24.17	Positive	Positive	32.91	27.9899	4
W215	LTRI-870	May (12) 2020	post-COVID-19	NASOP	COVID-19 postive (not tested by 'Seegene assay')				23.74	21.46	Positive	Positive	28098.1	23897.4	4
W216	LTRI-871	May (12) 2020	post-COVID-19	NASOP	COVID-19 postive (not tested by 'Seegene assay')				35.34	24.13	Positive	Negative	13.78	11.7199	4
W217	LTRI-872	May (12) 2020	post-COVID-19	NASOP	COVID-19 postive (not tested by 'Seegene assay')				30.24	21.37	Positive	Positive	393.94	335.045	3,4
W218	LTRI-873	May (12) 2020	post-COVID-19	NASOP	COVID-19 postive (not tested by 'Seegene assay')				30.03	21.66	Positive	Positive	452.04	384.459	3,4
W219	LTRI-874	May (12) 2020	post-COVID-19	NASOP	COVID-19 postive	14.63	16.26	15.79	22.3	22.36	Positive	Positive	72550.1	61703.7	3,4
W220	LTRI-875	May (12) 2020	post-COVID-19	NASOP	COVID-19 postive (not tested by 'Seegene assay')				31.17	22.97	Positive	Positive	213.08	181.224	3,4
W221	LTRI-876	May (12) 2020	post-COVID-19	NASOP	COVID-19 positive/Influenza testing not performed. Testing currently suspended.	30.57	32.39	32.94	34.72	22.88	Positive	Positive	20.81	17.6989	3,4
W222	LTRI-877	May (12) 2020	post-COVID-19	NASOP	COVID-19 postive	ND	31.98	32.71	33.8	22.56	Positive	Positive	38.08	32.387	3,4
W228	LTRI-883	May (12) 2020	post-COVID-19	NASOP	COVID-19 postive	23.31	24.38	22.97	31.52	22.37	Positive	Positive	170.21	144.763	4
W230	LTRI-885	May (12) 2020	post-COVID-19	NASOP	COVID-19 postive	14.89	17.3	15.86	24.62	23.08	Positive	Positive	15841.2	13472.9	3,4
W231	LTRI-886	May (12) 2020	post-COVID-19	NASOP	COVID-19 postive	19.57	20.83	20.74	27.28	21.58	Positive	Positive	2756.72	2344.59	3,4
W233	LTRI-888	May (12) 2020	post-COVID-19	NASOP	COVID-19 postive	27.86	29.14	29.85	36.03	23.28	Positive	Negative	8.79	7.47588	3,4
W234	LTRI-889	May (12) 2020	post-COVID-19	NASOP	COVID-19 postive	29.85	31.71	33.86	35.78	23.88	Positive	Negative	10.31	8.76864	3,4
W237	LTRI-892	May (12) 2020	post-COVID-19	NASOP	COVID-19 postive (not tested by 'Seegene assay')				35.39	20.13	Positive	Negative	13.33	11.3371	4
W240	LTRI-895	May (12) 2020	post-COVID-19	NASOP	COVID-19 postive	ND	ND	37.97	36.18	23.08	Positive	Negative	7.93	6.74445	4
W242	LTRI-897	May (12) 2020	post-COVID-19	NASOP	COVID-19 postive	15.23	17.1	18.13	20.45	21.06	Positive	Positive	245632	208909	3,4
W243	LTRI-898	May (12) 2020	post-COVID-19	NASOP	COVID-19 postive	27.26	29.33	29.37	34.43	21.19	Positive	Positive	25.17	21.407	3,4
W247	LTRI-902	May (12) 2020	post-COVID-19	NASOP	COVID-19 postive	14.22	15.99	15.35	19.92	19.21	Positive	Positive	345964	294242	4
W248	LTRI-903	May (12) 2020	post-COVID-19	NASOP	COVID-19 postive	16.1	17.64	17.06	25.76	23.63	Positive	Positive	7453.54	6339.22	4
W253	LTRI-908	May (12) 2020	post-COVID-19	NASOP	COVID-19 postive	21.27	22.28	22.76	26.61	21.49	Positive	Positive	4288.83	3647.64	3,4
W255	LTRI-910	May (12) 2020	post-COVID-19	NASOP	COVID-19 postive	ND	31.44	33.06	36.81	23.57	Positive	Negative	5.24	4.45661	3,4
W256	LTRI-911	May (12) 2020	post-COVID-19	NASOP	COVID-19 postive	26.34	27.93	27.07	32.44	21.21	Positive	Positive	92.88	78.9943	3,4
W257	LTRI-912	May (12) 2020	post-COVID-19	NASOP	COVID-19 postive (not tested by 'Seegene assay')				24.69	23.64	Positive	Positive	15073.3	12819.8	3,4
W258	LTRI-913	May (12) 2020	post-COVID-19	NASOP	COVID-19 postive (not tested by 'Seegene assay')				31.13	23.15	Positive	Positive	218.77	186.064	3,4
W259	LTRI-914	May (12) 2020	post-COVID-19	NASOP	COVID-19 postive (not tested by 'Seegene assay')				32.63	24.1	Positive	Positive	81.95	69.6983	4
W260	LTRI-915	May (12) 2020	post-COVID-19	NASOP	COVID-19 postive (not tested by 'Seegene assay')				32.56	22.65	Positive	Positive	85.49	72.7091	4
W262	LTRI-917	May (12) 2020	post-COVID-19	NASOP	COVID-19 postive	30.02	30.58	33.13	35.35	24.23	Positive	Negative	13.69	11.6433	4
W263	LTRI-918	May (12) 2020	post-COVID-19	NASOP	COVID-19 postive (not tested by 'Seegene assay')				25.28	24.23	Positive	Positive	10240.4	8709.46	4
W483	LTRI-922	May (12) 2020	post-COVID-19	NASOP	COVID-19 postive	27.5	28.86	29.58	34.04	20.72	Positive	Positive	32.48	27.6242	3,4
W484	LTRI-923	May (12) 2020	post-COVID-19	NASOP	COVID-19 postive	22.93	25.41	26.21	33.95	22.98	Positive	Positive	34.51	29.3507	3,4
W487	LTRI-926	May (12) 2020	post-COVID-19	NASOP	COVID-19 postive	24.8	25.66	26.26	32.97	22.12	Positive	Positive	65.61	55.8012	4
W489	LTRI-928	May (12) 2020	post-COVID-19	NASOP	COVID-19 postive	22.02	23.32	23.14	28.21	19.03	Positive	Positive	1497.57	1273.68	4
W490	LTRI-929	May (12) 2020	post-COVID-19	NASOP	COVID-19 postive	13.55	16.04	14.54	21.52	20.13	Positive	Positive	121140	103029	4
W491	LTRI-930	May (12) 2020	post-COVID-19	NASOP	COVID-19 postive	17.58	19.47	17.83	22.63	20.36	Positive	Positive	58501.8	49755.6	4
W545	LTRI-936	May (12) 2020	post-COVID-19	NASOP	COVID-19 postive	ND	ND	34.09	36.59	28.77	Positive	Negative	6.07	5.16252	3,4
W546	LTRI-937	May (12) 2020	post-COVID-19	NASOP	COVID-19 postive	24.08	25.87	25.99	31.57	22.29	Positive	Positive	164.03	139.507	3,4
W547	LTRI-938	May (12) 2020	post-COVID-19	NASOP	COVID-19 postive	25.72	27.16	27.78	33.02	20.53	Positive	Positive	63.18	53.7345	4
W549	LTRI-940	May (12) 2020	post-COVID-19	NASOP	COVID-19 postive	9.42	11.36	11.36	18.4	22.49	Positive	Positive	941697	800912	4
W550	LTRI-941	May (12) 2020	post-COVID-19	NASOP	COVID-19 postive	ND	33.29	33.18	36.7	20.88	Positive	Negative	5.66	4.81382	4
W551	LTRI-942	May (12) 2020	post-COVID-19	NASOP	COVID-19 postive (not tested by 'Seegene assay')				23.52	22.94	Positive	Positive	32541	27676	4
W552	LTRI-943	May (12) 2020	post-COVID-19	NASOP	COVID-19 postive (not tested by 'Seegene assay')				27.48	21.5	Positive	Positive	2413.4	2052.59	4
W530	LTRI-944	May (12) 2020	post-COVID-19	NASOP	COVID-19 postive (not tested by 'Seegene assay')				23.44	24.17	Positive	Positive	34408.8	29264.6	3,4
W531	LTRI-945	May (12) 2020	post-COVID-19	NASOP	COVID-19 postive	14.74	16.75	15.96	20.22	19.76	Positive	Positive	285396	242729	3,4
W532	LTRI-946	May (12) 2020	post-COVID-19	NASOP	COVID-19 postive	28.3	28.72	29.63	34.05	20.63	Positive	Positive	32.22	27.4031	3,4
W533	LTRI-947	May (12) 2020	post-COVID-19	NASOP	COVID-19 postive	ND	32.96	32.8	36.04	22.53	Positive	Negative	8.71	7.40784	3,4
W535	LTRI-949	May (12) 2020	post-COVID-19	NASOP	COVID-19 postive	ND	ND	37.86	36.97	23.45	Positive	Negative	4.72	4.01435	3,4
W536	LTRI-950	May (12) 2020	post-COVID-19	NASOP	COVID-19 postive	26.46	28.03	29.01	32.6	23.15	Positive	Positive	83.69	71.1782	4

## Sheet: Supplementary Table 8
Supplementary Table 8: Confusion matrix of extended cohort
'BGI' POSITIVE: Ct<37		Actual
		Positive (98)	Negative (444)
Predicted	Positive (82)	82	0
	Negative (460)	16	444
		Values
	Sensitivity	0.836735	Ct <35 = 0.91	35<Ct<37=0.44
	Specificity	1
	PPV	1
	NPV	0.965217
	Accuracy	0.97048

## Sheet: Supplementary Table 9
Supplementary Table 9: Group classifications
Group #	Cohort name	Nb of samples	After confirmed diagnosis	Nb of postive samples	Nb of negative samples
Group 1	Proof of Concept (PoC)	19	19	17	2
Group 2	Test	112	NA	24	88
Group 3	Pilot	378	341	52	289
Group 4	Extended	663	663	98	565
